# Supplementary material for: Secondary aerosol formation from dimethyl sulfide – improvedmechanistic understanding based on smog chamber experimentsand modelling
Source: Copernicus journal article supplement (doi:10.5194/acp-2020-1324), 2021-02-08
Supplement: Supplementary file 1 [file acp-2020-1324-supplement.pdf]

# Secondary aerosol formation from dimethyl sulfide - improved mechanistic understanding based on smog chamber experiments and modelling

Robin Wollesen de Jonge<sup>1</sup>, Jonas Elm<sup>2</sup>, Bernadette Rosati<sup>2,4</sup>, Sigurd Christiansen<sup>2</sup>, Noora Hyttinen<sup>3</sup>, Dana Lüdemann<sup>1</sup>, Merete Bilde<sup>2</sup>, and Pontus Roldin<sup>1</sup>

<sup>1</sup>Division of Nuclear Physics, Lund University, P.O. Box 118, Lund, Sweden

<sup>2</sup>Department of Chemistry, Aarhus University, Langelandsgade 140, Aarhus, Denmark

<sup>3</sup>Nano and Molecular Systems Research Unit, University of Oulu, P.O. Box 3000, FI-90014 Oulu, Finland

<sup>4</sup>Faculty of Physics, University of Vienna, Boltzmanngasse 5, AT-1090 Vienna, Austria

**Correspondence:** Robin Wollesen de Jonge (robin.wdejonge@nuclear.lu.se)

## S1 Reaction mechanism

Table S1: Multiphase DMS mechanism. Reactions related to the MCMv3.3.1 isoprene chemistry scheme have been excluded.

| #  | Reaction                            | Rate                                                                                                              | Ref. |
|----|-------------------------------------|-------------------------------------------------------------------------------------------------------------------|------|
| 1  | $O \rightarrow O_3$                 | $5.6D-34 \cdot [N_2] \cdot (T/300)^{-2.6} \cdot [O_2]$<br>$+6.0D-34 \cdot [O_2] \cdot (T/300)^{-2.6} \cdot [O_2]$ | [1]  |
| 2  | $O + O_3 \rightarrow \text{DUMMY}$  | $8.0D-12 \cdot \exp(-2060/T)$                                                                                     | [1]  |
| 3  | $O + NO \rightarrow NO_2$           | KMT01                                                                                                             | [1]  |
| 4  | $O + NO_2 \rightarrow NO$           | $5.5D-12 \cdot \exp(188/T)$                                                                                       | [1]  |
| 5  | $O + NO_2 \rightarrow NO_3$         | KMT02                                                                                                             | [1]  |
| 6  | $O1D \rightarrow O$                 | $3.2D-11 \cdot \exp(67/T) \cdot [O_2] + 2.0D-11 \cdot \exp(130/T) \cdot [N_2]$                                    | [1]  |
| 7  | $NO + O_3 \rightarrow NO_2$         | $1.4D-12 \cdot \exp(-1310/T)$                                                                                     | [1]  |
| 8  | $NO_2 + O_3 \rightarrow NO_3$       | $1.4D-13 \cdot \exp(-2470/T)$                                                                                     | [1]  |
| 9  | $NO + NO \rightarrow NO_2 + NO_2$   | $3.3D-39 \cdot \exp(530/T) \cdot [O_2]$                                                                           | [1]  |
| 10 | $NO + NO_3 \rightarrow NO_2 + NO_2$ | $1.8D-11 \cdot \exp(110/T)$                                                                                       | [1]  |
| 11 | $NO_2 + NO_3 \rightarrow NO + NO_2$ | $4.50D-14 \cdot \exp(-1260/T)$                                                                                    | [1]  |
| 12 | $NO_2 + NO_3 \rightarrow [N_2]O_5$  | KMT03                                                                                                             | [1]  |

[1] MCMv3.3.1 ; [2] Hoffmann et al. (2016) ; [3] Wu et al. (2014) ; [4] Berndt et al. (2019) ; [5] Kukui et al. (2003)

[6] Atkinson et al. (2007) ; [7] Sander et al. (2006) ; [8] Atkinson et al. (2008) ; [9] Braeuer et al. (2013) ; [10] Jacobson (2005)

[11] Demore et al. (1997) ; [12] Berndt et al. (2020) ; [13] Kahan et al. (2012) ; [14] Burkholder et al. (2015)

[E] Estimate based on equilibrium coefficients ; [C] Based on pKa value from COSMOtherm ; [A] Assumed

| #  | Reaction                                                                                | Rate                                                                                                                                            | Ref.     |
|----|-----------------------------------------------------------------------------------------|-------------------------------------------------------------------------------------------------------------------------------------------------|----------|
| 13 | $\text{O1D} \rightarrow \text{OH} + \text{OH}$                                          | $2.14\text{D}\cdot 10\cdot \text{H}_2\text{O}$                                                                                                  | [1]      |
| 14 | $\text{OH} + \text{O}_3 \rightarrow \text{HO}_2$                                        | $1.70\text{D}\cdot 12\cdot \exp(-940/\text{T})$                                                                                                 | [1]      |
| 15 | $\text{OH} + \text{H}_2 \rightarrow \text{HO}_2$                                        | $7.7\text{D}\cdot 12\cdot \exp(-2100/\text{T})$                                                                                                 | [1]      |
| 16 | $\text{OH} + \text{CO} \rightarrow \text{HO}_2$                                         | KMT05                                                                                                                                           | [1]      |
| 17 | $\text{OH} + \text{H}_2\text{O}_2 \rightarrow \text{HO}_2$                              | $2.9\text{D}\cdot 12\cdot \exp(-160/\text{T})$                                                                                                  | [1]      |
| 18 | $\text{HO}_2 + \text{O}_3 \rightarrow \text{OH}$                                        | $2.03\text{D}\cdot 16\cdot (\text{T}/300)^{4.57}\cdot \exp(693/\text{T})$                                                                       | [1]      |
| 19 | $\text{OH} + \text{HO}_2 \rightarrow \text{DUMMY}$                                      | $4.8\text{D}\cdot 11\cdot \exp(250/\text{T})$                                                                                                   | [1]      |
| 20 | $\text{HO}_2 + \text{HO}_2 \rightarrow \text{H}_2\text{O}_2$                            | $2.20\text{D}\cdot 13\cdot \text{KMT06}\cdot \exp(600/\text{T}) + 1.90\text{D}\cdot 33\cdot \text{M}\cdot \text{KMT06}\cdot \exp(980/\text{T})$ | [1]      |
| 21 | $\text{OH} + \text{NO} \rightarrow \text{HONO}$                                         | KMT07                                                                                                                                           | [1]      |
| 22 | $\text{OH} + \text{NO}_2 \rightarrow \text{HNO}_3$                                      | KMT08                                                                                                                                           | [1]      |
| 23 | $\text{OH} + \text{NO}_3 \rightarrow \text{HO}_2 + \text{NO}_2$                         | 2.0D-11                                                                                                                                         | [1]      |
| 24 | $\text{HO}_2 + \text{NO} \rightarrow \text{OH} + \text{NO}_2$                           | $3.45\text{D}\cdot 12\cdot \exp(270/\text{T})$                                                                                                  | [1]      |
| 25 | $\text{HO}_2 + \text{NO}_2 \rightarrow \text{HO}_2\text{NO}_2$                          | KMT09                                                                                                                                           | [1]      |
| 26 | $\text{OH} + \text{HO}_2\text{NO}_2 \rightarrow \text{NO}_2$                            | $3.2\text{D}\cdot 13\cdot \exp(690/\text{T})\cdot 1.0$                                                                                          | [1]      |
| 27 | $\text{HO}_2 + \text{NO}_3 \rightarrow \text{OH} + \text{NO}_2$                         | 4.0D-12                                                                                                                                         | [1]      |
| 28 | $\text{OH} + \text{HONO} \rightarrow \text{NO}_2$                                       | $2.5\text{D}\cdot 12\cdot \exp(260/\text{T})$                                                                                                   | [1]      |
| 29 | $\text{OH} + \text{HNO}_3 \rightarrow \text{NO}_3$                                      | KMT11                                                                                                                                           | [1]      |
| 30 | $\text{O} + \text{SO}_2 \rightarrow \text{SO}_3$                                        | $4.0\text{D}\cdot 32\cdot \exp(-1000/\text{T})\cdot \text{M}$                                                                                   | [1]      |
| 31 | $\text{OH} + \text{SO}_2 \rightarrow \text{HSO}_3$                                      | KMT12                                                                                                                                           | [1]      |
| 32 | $\text{HSO}_3 \rightarrow \text{HO}_2 + \text{SO}_3$                                    | $1.3\text{D}\cdot 12\cdot \exp(-330/\text{T})\cdot [\text{O}_2]$                                                                                | [1]      |
| 33 | $\text{SO}_3 \rightarrow \text{H}_2\text{SO}_4$                                         | 1.20D-15-H <sub>2</sub> O                                                                                                                       | [1]      |
| 34 | $\text{O}_3 \rightarrow \text{O1D}$                                                     | J(1)                                                                                                                                            | [1]      |
| 35 | $\text{O}_3 \rightarrow \text{O}$                                                       | J(2)                                                                                                                                            | [1]      |
| 36 | $\text{H}_2\text{O}_2 \rightarrow \text{OH} + \text{OH}$                                | J(3)                                                                                                                                            | [8] [13] |
| 37 | $\text{NO}_2 \rightarrow \text{NO} + \text{O}$                                          | J(4)                                                                                                                                            | [1]      |
| 38 | $\text{NO}_3 \rightarrow \text{NO}$                                                     | J(5)                                                                                                                                            | [1]      |
| 39 | $\text{NO}_3 \rightarrow \text{NO}_2 + \text{O}$                                        | J(6)                                                                                                                                            | [1]      |
| 40 | $\text{HONO} \rightarrow \text{OH} + \text{NO}$                                         | J(7)                                                                                                                                            | [1]      |
| 41 | $\text{HNO}_3 \rightarrow \text{OH} + \text{NO}_2$                                      | J(8)                                                                                                                                            | [1]      |
| 42 | $[\text{N}_2]\text{O}_5 \rightarrow \text{NO}_2 + \text{NO}_3$                          | KMT04                                                                                                                                           | [1]      |
| 43 | $\text{HO}_2\text{NO}_2 \rightarrow \text{HO}_2 + \text{NO}_2$                          | KMT10                                                                                                                                           | [1]      |
| 44 | $\text{DMS} + \text{NO}_3 \rightarrow \text{CH}_3\text{SCH}_2\text{O}_2 + \text{HNO}_3$ | $1.9\text{D}\cdot 13\cdot \exp(520/\text{T})$                                                                                                   | [1]      |
| 45 | $\text{DMS} + \text{OH} \rightarrow \text{CH}_3\text{SCH}_2\text{O}_2$                  | $1.12\text{D}\cdot 11\cdot \exp(-250/\text{T})$                                                                                                 | [1]      |
| 46 | $\text{DMS} + \text{OH} \rightarrow \text{HODMSO}_2$                                    | KMT18                                                                                                                                           | [1]      |
| 47 | $\text{DMS} + \text{OH} \rightarrow \text{CH}_3\text{SOHCH}_3$                          | KMT18                                                                                                                                           | [2]      |
| 48 | $\text{CH}_3\text{SOHCH}_3 \rightarrow \text{DMS} + \text{OH}$                          | $(1.7\text{D}\cdot 42\cdot \text{O}_2\cdot \exp(7810/\text{T})) / (1\text{D}0 + 5.5\text{D}\cdot 31\cdot \text{O}_2\cdot$                       | [2]      |

[1] MCMv3.3.1 ; [2] Hoffmann et al. (2016) ; [3] Wu et al. (2014) ; [4] Berndt et al. (2019) ; [5] Kukui et al. (2003)  
 [6] Atkinson et al. (2007) ; [7] Sander et al. (2006) ; [8] Atkinson et al. (2008) ; [9] Braeuer et al. (2013) ; [10] Jacobson (2005)  
 [11] Demore et al. (1997) ; [12] Berndt et al. (2020) ; [13] Kahan et al. (2012) ; [14] Burkholder et al. (2015)  
 [E] Estimate based on equilibrium coefficients ; [C] Based on pKa value from COSMOtherm ; [A] Assumed

| #  | Reaction                                                                                                                    | Rate                                                                                         | Ref. |
|----|-----------------------------------------------------------------------------------------------------------------------------|----------------------------------------------------------------------------------------------|------|
|    |                                                                                                                             | $\exp(7640/T)/((8.3D-29 \cdot T \cdot \exp(5136/T)))$                                        |      |
| 49 | $\text{CH}_3\text{SOHCH}_3 \rightarrow \text{HODMSO}_2$                                                                     | $8.5D-13 \cdot [\text{O}_2]$                                                                 | [2]  |
| 50 | $\text{CH}_3\text{SOHCH}_3 \rightarrow \text{CH}_3\text{SOH} + \text{CH}_3\text{O}_2$                                       | 5D5                                                                                          | [2]  |
| 51 | $\text{CH}_3\text{SOH} + \text{OH} \rightarrow \text{CH}_3\text{SO}$                                                        | 5D-11                                                                                        | [2]  |
| 52 | $\text{DMS} + \text{Cl} \rightarrow \text{CH}_3\text{SCH}_2\text{O}_2 + \text{HCl}$                                         | $0.45 \cdot 3.4D-10$                                                                         | [2]  |
| 53 | $\text{DMS} + \text{Cl} \rightarrow \text{CH}_3\text{SCH}_3\text{Cl}$                                                       | $0.55 \cdot 3.4D-10$                                                                         | [2]  |
| 54 | $\text{DMS} + \text{ClO} \rightarrow \text{DMSO} + \text{Cl}$                                                               | $0.73 \cdot 1.7D-15 \cdot \exp(340/T)$                                                       | [2]  |
| 55 | $\text{DMS} + \text{ClO} \rightarrow \text{CH}_3\text{SCH}_2\text{O}_2 + \text{HOCl}$                                       | $0.27 \cdot 1.7D-15 \cdot \exp(340/T)$                                                       | [2]  |
| 56 | $\text{DMS} + \text{Cl}_2 \rightarrow \text{CH}_3\text{SCH}_2\text{Cl} + \text{HCl}$                                        | 3.4D-14                                                                                      | [2]  |
| 57 | $\text{CH}_3\text{SCH}_2\text{Cl} + \text{OH} \rightarrow \text{CH}_3\text{SOH} + \text{CH}_2\text{ClO}_2$                  | 2.5D-12                                                                                      | [2]  |
| 58 | $\text{CH}_3\text{SCH}_3\text{Cl} + \text{NO}_2 \rightarrow \text{DMS} + \text{ClNO}_2$                                     | 2.7D-11                                                                                      | [2]  |
| 59 | $\text{CH}_3\text{SCH}_3\text{Cl} + \text{NO} \rightarrow \text{DMS} + \text{ClNO}$                                         | 1.2D-11                                                                                      | [2]  |
| 60 | $\text{CH}_3\text{SCH}_3\text{Cl} \rightarrow \text{DMSO} + \text{ClO}$                                                     | $4D-18 \cdot [\text{O}_2]$                                                                   | [2]  |
| 61 | $\text{CH}_3\text{SCH}_3\text{Cl} \rightarrow \text{DMS} + \text{Cl}$                                                       | 9D1                                                                                          | [2]  |
| 62 | $\text{CH}_3\text{SOCH}_3\text{Cl} \rightarrow \text{DMSO}_2 + \text{ClO}$                                                  | $3D-18 \cdot [\text{O}_2]$                                                                   | [2]  |
| 63 | $\text{CH}_3\text{SOCH}_3\text{Cl} + \text{NO} \rightarrow \text{DMSO} + \text{ClNO}$                                       | 1.2D-11                                                                                      | [2]  |
| 64 | $\text{CH}_3\text{SOCH}_3\text{Cl} + \text{NO}_2 \rightarrow \text{DMSO} + \text{ClNO}_2$                                   | 2.1D-11                                                                                      | [2]  |
| 65 | $\text{CH}_3\text{SOCH}_3\text{Cl} + \text{CH}_3\text{SOCH}_3\text{Cl} \rightarrow \text{DMSO} + \text{DMSO} + \text{Cl}_2$ | 3D-11                                                                                        | [2]  |
| 66 | $\text{CH}_3\text{SOCH}_3\text{Cl} \rightarrow \text{DMSO} + \text{Cl}$                                                     | 9D1                                                                                          | [2]  |
| 67 | $\text{CH}_3\text{SCH}_2\text{O}_2 + \text{HO}_2 \rightarrow \text{CH}_3\text{SCH}_2\text{OOH}$                             | $\text{KRO}_2\text{HO}_2 \cdot 0.387$                                                        | [1]  |
| 68 | $\text{CH}_3\text{SCH}_2\text{O}_2 + \text{NO} \rightarrow \text{CH}_3\text{SCH}_2\text{O} + \text{NO}_2$                   | $4.9D-12 \cdot \exp(260/T)$                                                                  | [1]  |
| 69 | $\text{CH}_3\text{SCH}_2\text{O}_2 + \text{NO}_3 \rightarrow \text{CH}_3\text{SCH}_2\text{O} + \text{NO}_2$                 | $\text{KRO}_2\text{NO}_3$                                                                    | [1]  |
| 70 | $\text{CH}_3\text{SCH}_2\text{O}_2 \rightarrow \text{CH}_3\text{SCH}_2\text{O}$                                             | $2 \cdot (\text{K}298\text{CH}_3\text{O}_2 \cdot 1.0D-11)^{0.5} \cdot \text{RO}_2 \cdot 0.8$ | [1]  |
| 71 | $\text{CH}_3\text{SCH}_2\text{O}_2 \rightarrow \text{CH}_3\text{SCH}_2\text{OH}$                                            | $2 \cdot (\text{K}298\text{CH}_3\text{O}_2 \cdot 1.0D-11)^{0.5} \cdot \text{RO}_2 \cdot 0.1$ | [1]  |
| 72 | $\text{CH}_3\text{SCH}_2\text{O}_2 \rightarrow \text{CH}_3\text{SCHO}$                                                      | $2 \cdot (\text{K}298\text{CH}_3\text{O}_2 \cdot 1.0D-11)^{0.5} \cdot \text{RO}_2 \cdot 0.1$ | [1]  |
| 73 | $\text{CH}_3\text{SCH}_2\text{O}_2 \rightarrow \text{OOCH}_2\text{SCH}_2\text{OOH}$                                         | $2.2433D11 \cdot \exp(-9.8016D3/T) \cdot \exp(1.0348E8/T^3) \cdot 5D0$                       | [4]  |
| 74 | $\text{OOCH}_2\text{SCH}_2\text{OOH} \rightarrow \text{HPMTF} + \text{OH}$                                                  | $6.097D11 \cdot \exp(-9.4892D3/T) \cdot \exp(1.102E8/T^3)$                                   | [4]  |
| 75 | $\text{OOCH}_2\text{SCH}_2\text{OOH} + \text{NO} \rightarrow \text{HOOCH}_2\text{S} + \text{NO}_2 + \text{HCHO}$            | $4.9D-12 \cdot \exp(260/T)$                                                                  | [1]  |
| 76 | $\text{OOCH}_2\text{SCH}_2\text{OOH} + \text{HO}_2 \rightarrow \text{HOOCH}_2\text{SCH}_2\text{OOH}$                        | $1.13D-13 \cdot \exp(1300/T)$                                                                | [1]  |
| 77 | $\text{HPMTF} + \text{OH} \rightarrow \text{HOOCH}_2\text{SCO}$                                                             | $1.4D-12 \cdot \exp(0D0/T)$                                                                  | [3]  |
| 78 | $\text{HOOCH}_2\text{SCO} \rightarrow \text{HOOCH}_2\text{S} + \text{CO}$                                                   | $9.2D9 \cdot \exp(-505.4/T)$                                                                 | [3]  |
| 79 | $\text{HOOCH}_2\text{SCO} \rightarrow \text{HCHO} + \text{OH} + \text{OCS}$                                                 | $1.6D7 \cdot \exp(-1468.6/T)$                                                                | [3]  |
| 80 | $\text{HOOCH}_2\text{S} + \text{O}_3 \rightarrow \text{HOOCH}_2\text{SO}$                                                   | $1.15D-12 \cdot \exp(430/T)$                                                                 | [3]  |
| 81 | $\text{HOOCH}_2\text{S} + \text{NO}_2 \rightarrow \text{HOOCH}_2\text{SO} + \text{NO}$                                      | $6.00D-11 \cdot \exp(240/T)$                                                                 | [3]  |
| 82 | $\text{HOOCH}_2\text{SO} + \text{O}_3 \rightarrow \text{SO}_2 + \text{HCHO} + \text{OH}$                                    | 4.00D-13                                                                                     | [3]  |
| 83 | $\text{HOOCH}_2\text{SO} + \text{NO}_2 \rightarrow \text{SO}_2 + \text{HCHO} + \text{OH} + \text{NO}$                       | 1.20D-11                                                                                     | [3]  |
| 84 | $\text{HODMSO}_2 + \text{NO} \rightarrow \text{DMSO}_2 + \text{HO}_2 + \text{NO}_2$                                         | $\text{KRO}_2\text{NO}$                                                                      | [1]  |

[1] MCMv3.3.1 ; [2] Hoffmann et al. (2016) ; [3] Wu et al. (2014) ; [4] Berndt et al. (2019) ; [5] Kukui et al. (2003)  
 [6] Atkinson et al. (2007) ; [7] Sander et al. (2006) ; [8] Atkinson et al. (2008) ; [9] Brauer et al. (2013) ; [10] Jacobson (2005)  
 [11] Demore et al. (1997) ; [12] Berndt et al. (2020) ; [13] Kahan et al. (2012) ; [14] Burkholder et al. (2015)  
 [E] Estimate based on equilibrium coefficients ; [C] Based on pKa value from COSMOtherm ; [A] Assumed

| #   | Reaction                                                                                                      | Rate                                                                               | Ref. |
|-----|---------------------------------------------------------------------------------------------------------------|------------------------------------------------------------------------------------|------|
| 85  | $\text{HODMSO}_2 \rightarrow \text{DMSO} + \text{HO}_2$                                                       | $8.90\text{D}+10\cdot\exp(-6040/\text{T})$                                         | [1]  |
| 86  | $\text{CH}_3\text{SCH}_2\text{OOH} + \text{OH} \rightarrow \text{CH}_3\text{SCHO} + \text{OH}$                | 7.03D-11                                                                           | [1]  |
| 87  | $\text{CH}_3\text{SCH}_2\text{OOH} \rightarrow \text{CH}_3\text{SCH}_2\text{O} + \text{OH}$                   | J(41)                                                                              | [1]  |
| 88  | $\text{CH}_3\text{SCH}_2\text{O} \rightarrow \text{CH}_3\text{S} + \text{HCHO}$                               | KDEC                                                                               | [1]  |
| 89  | $\text{CH}_3\text{SCH}_2\text{OH} + \text{OH} \rightarrow \text{CH}_3\text{SCHO} + \text{HO}_2$               | 2.78D-11                                                                           | [1]  |
| 90  | $\text{CH}_3\text{SCHO} + \text{OH} \rightarrow \text{CH}_3\text{S} + \text{CO}$                              | 1.11D-11                                                                           | [1]  |
| 91  | $\text{CH}_3\text{SCHO} \rightarrow \text{CH}_3\text{S} + \text{CO} + \text{HO}_2$                            | J(15)                                                                              | [1]  |
| 92  | $\text{DMSO}_2 + \text{OH} \rightarrow \text{DMSO}_2\text{O}_2$                                               | 4.40D-14                                                                           | [1]  |
| 93  | $\text{DMSO} + \text{OH} \rightarrow \text{MSIA} + \text{CH}_3\text{O}_2$                                     | $6.10\text{D}-12\cdot\exp(800/\text{T})$                                           | [1]  |
| 94  | $\text{DMSO} + \text{NO}_3 \rightarrow \text{DMSO}_2 + \text{NO}_2$                                           | 2.9D-13                                                                            | [2]  |
| 95  | $\text{DMSO} + \text{Cl} \rightarrow \text{CH}_3\text{SOCH}_2\text{O}_2 + \text{HCl}$                         | 1.45D-11                                                                           | [2]  |
| 96  | $\text{DMSO} + \text{Cl} \rightarrow \text{CH}_3\text{SOCH}_2\text{Cl}$                                       | 7.4D-11                                                                            | [2]  |
| 97  | $\text{CH}_3\text{SOCH}_2\text{O}_2 + \text{NO} \rightarrow \text{CH}_3\text{SO} + \text{HCHO} + \text{NO}_2$ | 7.5D-12                                                                            | [2]  |
| 98  | $\text{CH}_3\text{SOCH}_2\text{O}_2 + \text{HO}_2 \rightarrow \text{CH}_3\text{SOCH}_2\text{OOH}$             | 1.5D-12                                                                            | [2]  |
| 99  | $\text{CH}_3\text{S} + \text{NO}_2 \rightarrow \text{CH}_3\text{SO} + \text{NO}$                              | $6.00\text{D}-11\cdot\exp(240/\text{T})$                                           | [1]  |
| 100 | $\text{CH}_3\text{S} + \text{O}_3 \rightarrow \text{CH}_3\text{SO}$                                           | $1.15\text{D}-12\cdot\exp(430/\text{T})$                                           | [1]  |
| 101 | $\text{CH}_3\text{S} \rightarrow \text{CH}_3\text{SOO}$                                                       | $1.20\text{D}-16\cdot\exp(1580/\text{T})\cdot[\text{O}_2]$                         | [1]  |
| 102 | $\text{HCHO} \rightarrow \text{CO} + \text{HO}_2 + \text{HO}_2$                                               | J(11)                                                                              | [1]  |
| 103 | $\text{HCHO} \rightarrow \text{H}_2 + \text{CO}$                                                              | J(12)                                                                              | [1]  |
| 104 | $\text{NO}_3 + \text{HCHO} \rightarrow \text{HNO}_3 + \text{CO} + \text{HO}_2$                                | 5.5D-16                                                                            | [1]  |
| 105 | $\text{OH} + \text{HCHO} \rightarrow \text{HO}_2 + \text{CO}$                                                 | $5.4\text{D}-12\cdot\exp(135/\text{T})$                                            | [1]  |
| 106 | $\text{DMSO}_2\text{O}_2 + \text{HO}_2 \rightarrow \text{DMSO}_2\text{OOH}$                                   | $\text{KRO}_2\text{HO}_2\cdot 0.387$                                               | [1]  |
| 107 | $\text{DMSO}_2\text{O}_2 + \text{NO} \rightarrow \text{DMSO}_2\text{O} + \text{NO}_2$                         | $\text{KRO}_2\text{NO}$                                                            | [1]  |
| 108 | $\text{DMSO}_2\text{O}_2 + \text{NO}_3 \rightarrow \text{DMSO}_2\text{O} + \text{NO}_2$                       | $\text{KRO}_2\text{NO}_3$                                                          | [1]  |
| 109 | $\text{DMSO}_2\text{O}_2 \rightarrow \text{CH}_3\text{SO}_2\text{CHO}$                                        | $2.00\text{D}-12\cdot\text{RO}_2\cdot 0.2$                                         | [1]  |
| 110 | $\text{DMSO}_2\text{O}_2 \rightarrow \text{DMSO}_2\text{O}$                                                   | $2.00\text{D}-12\cdot\text{RO}_2\cdot 0.6$                                         | [1]  |
| 111 | $\text{DMSO}_2\text{O}_2 \rightarrow \text{DMSO}_2\text{OH}$                                                  | $2.00\text{D}-12\cdot\text{RO}_2\cdot 0.2$                                         | [1]  |
| 112 | $\text{MSIA} + \text{OH} \rightarrow \text{CH}_3\text{O}_2 + \text{SO}_2$                                     | 0D0-9.00D-11                                                                       | [1]  |
| 113 | $\text{MSIA} + \text{OH} \rightarrow \text{CH}_3\text{SO}_2$                                                  | $1\text{D}-10\cdot\exp(0\text{D}0/\text{T})$                                       | [5]  |
| 114 | $\text{MSIA} + \text{NO}_3 \rightarrow \text{CH}_3\text{SO}_2 + \text{HNO}_3$                                 | 1D-13                                                                              | [2]  |
| 115 | $\text{CH}_3\text{O}_2 + \text{HO}_2 \rightarrow \text{CH}_3\text{OOH}$                                       | $3.8\text{D}-13\cdot\exp(780/\text{T})\cdot(1-1/(1+498\cdot\exp(-1160/\text{T})))$ | [1]  |
| 116 | $\text{CH}_3\text{O}_2 + \text{HO}_2 \rightarrow \text{HCHO}$                                                 | $3.8\text{D}-13\cdot\exp(780/\text{T})\cdot(1/(1+498\cdot\exp(-1160/\text{T})))$   | [1]  |
| 117 | $\text{CH}_3\text{O}_2 + \text{NO} \rightarrow \text{CH}_3\text{NO}_3$                                        | $2.3\text{D}-12\cdot\exp(360/\text{T})\cdot 0.001$                                 | [1]  |
| 118 | $\text{CH}_3\text{O}_2 + \text{NO} \rightarrow \text{CH}_3\text{O} + \text{NO}_2$                             | $2.3\text{D}-12\cdot\exp(360/\text{T})\cdot 0.999$                                 | [1]  |
| 119 | $\text{CH}_3\text{O}_2 + \text{NO}_2 \rightarrow \text{CH}_3\text{O}_2\text{NO}_2$                            | KMT13                                                                              | [1]  |
| 120 | $\text{CH}_3\text{O}_2 + \text{NO}_3 \rightarrow \text{CH}_3\text{O} + \text{NO}_2$                           | 1.2D-12                                                                            | [1]  |
| 121 | $\text{CH}_3\text{O}_2 \rightarrow \text{CH}_3\text{O}$                                                       | $2\cdot\text{KCH}_3\text{O}_2\cdot\text{RO}_2\cdot 7.18\cdot\exp(-885/\text{T})$   | [1]  |

[1] MCMv3.3.1 ; [2] Hoffmann et al. (2016) ; [3] Wu et al. (2014) ; [4] Berndt et al. (2019) ; [5] Kukui et al. (2003)  
 [6] Atkinson et al. (2007) ; [7] Sander et al. (2006) ; [8] Atkinson et al. (2008) ; [9] Braeuer et al. (2013) ; [10] Jacobson (2005)  
 [11] Demore et al. (1997) ; [12] Berndt et al. (2020) ; [13] Kahan et al. (2012) ; [14] Burkholder et al. (2015)  
 [E] Estimate based on equilibrium coefficients ; [C] Based on pKa value from COSMOtherm ; [A] Assumed

| #   | Reaction                                                                                         | Rate                                                                                             | Ref. |
|-----|--------------------------------------------------------------------------------------------------|--------------------------------------------------------------------------------------------------|------|
| 122 | $\text{CH}_3\text{O}_2 \rightarrow \text{CH}_3\text{OH}$                                         | $2 \cdot \text{KCH}_3\text{O}_2 \cdot \text{RO}_2 \cdot 0.5 \cdot (1 - 7.18 \cdot \exp(-885/T))$ | [1]  |
| 123 | $\text{CH}_3\text{O}_2 \rightarrow \text{HCHO}$                                                  | $2 \cdot \text{KCH}_3\text{O}_2 \cdot \text{RO}_2 \cdot 0.5 \cdot (1 - 7.18 \cdot \exp(-885/T))$ | [1]  |
| 124 | $\text{CH}_3\text{SO} + \text{NO}_2 \rightarrow \text{CH}_3\text{O}_2 + \text{SO}_2 + \text{NO}$ | 1.20D-11-0.25                                                                                    | [1]  |
| 125 | $\text{CH}_3\text{SO} + \text{NO}_2 \rightarrow \text{CH}_3\text{SO}_2 + \text{NO}$              | 1.20D-11-0.75                                                                                    | [1]  |
| 126 | $\text{CH}_3\text{SO} + \text{O}_3 \rightarrow \text{CH}_3\text{O}_2 + \text{SO}_2$              | 4.00D-13                                                                                         | [1]  |
| 127 | $\text{CH}_3\text{SO} \rightarrow \text{CH}_3\text{SOO}_2$                                       | $3.12\text{D}-16 \cdot \exp(1580/T) \cdot [\text{O}_2]$                                          | [1]  |
| 128 | $\text{CH}_3\text{SOO} + \text{NO} \rightarrow \text{CH}_3\text{SO} + \text{NO}_2$               | 1.1D-11                                                                                          | [1]  |
| 129 | $\text{CH}_3\text{SOO} + \text{NO}_2 \rightarrow \text{CH}_3\text{SO} + \text{NO}_3$             | 2.2D-11                                                                                          | [1]  |
| 130 | $\text{CH}_3\text{SOO} \rightarrow \text{CH}_3\text{O}_2 + \text{SO}_2$                          | $5.60\text{D}+16 \cdot \exp(-10870/T)$                                                           | [1]  |
| 131 | $\text{CH}_3\text{SOO} \rightarrow \text{CH}_3\text{S}$                                          | $3.50\text{D}+10 \cdot \exp(-3560/T)$                                                            | [1]  |
| 132 | $\text{CH}_3\text{SOO} + \text{HO}_2 \rightarrow \text{CH}_3\text{SOOH}$                         | 4D-12                                                                                            | [2]  |
| 133 | $\text{CH}_3\text{SOO} \rightarrow \text{CH}_3\text{SO}_2$                                       | 1D0                                                                                              | [2]  |
| 134 | $\text{DMSO}_2\text{OOH} + \text{OH} \rightarrow \text{CH}_3\text{SO}_2\text{CHO} + \text{OH}$   | 1.26D-12                                                                                         | [1]  |
| 135 | $\text{DMSO}_2\text{OOH} + \text{OH} \rightarrow \text{DMSO}_2\text{O}_2$                        | 3.60D-12                                                                                         | [1]  |
| 136 | $\text{DMSO}_2\text{OOH} \rightarrow \text{DMSO}_2\text{O} + \text{OH}$                          | J(41)                                                                                            | [1]  |
| 137 | $\text{DMSO}_2\text{O} \rightarrow \text{CH}_3\text{SO}_2 + \text{HCHO}$                         | KDEC                                                                                             | [1]  |
| 138 | $\text{CH}_3\text{SO}_2\text{CHO} + \text{OH} \rightarrow \text{CH}_3\text{SO}_2 + \text{CO}$    | 1.78D-12                                                                                         | [1]  |
| 139 | $\text{CH}_3\text{SO}_2\text{CHO} \rightarrow \text{CH}_3\text{SO}_2 + \text{CO} + \text{HO}_2$  | J(15)                                                                                            | [1]  |
| 140 | $\text{DMSO}_2\text{OH} + \text{OH} \rightarrow \text{CH}_3\text{SO}_2\text{CHO} + \text{HO}_2$  | 5.23D-13                                                                                         | [1]  |
| 141 | $\text{DMSO}_2\text{OH} + \text{OH} \rightarrow \text{DMSO}_2\text{O}$                           | 1.40D-13                                                                                         | [1]  |
| 142 | $\text{CH}_3\text{OOH} \rightarrow \text{CH}_3\text{O} + \text{OH}$                              | J(41)                                                                                            | [1]  |
| 143 | $\text{OH} + \text{CH}_3\text{OOH} \rightarrow \text{CH}_3\text{O}_2$                            | $5.3\text{D}-12 \cdot \exp(190/T) \cdot 0.6$                                                     | [1]  |
| 144 | $\text{OH} + \text{CH}_3\text{OOH} \rightarrow \text{HCHO} + \text{OH}$                          | $5.3\text{D}-12 \cdot \exp(190/T) \cdot 0.4$                                                     | [1]  |
| 145 | $\text{CH}_3\text{NO}_3 \rightarrow \text{CH}_3\text{O} + \text{NO}_2$                           | J(51)                                                                                            | [1]  |
| 146 | $\text{OH} + \text{CH}_3\text{NO}_3 \rightarrow \text{HCHO} + \text{NO}_2$                       | $4.0\text{D}-13 \cdot \exp(-845/T)$                                                              | [1]  |
| 147 | $\text{CH}_3\text{O} \rightarrow \text{HCHO} + \text{HO}_2$                                      | $7.2\text{D}-14 \cdot \exp(-1080/T) \cdot [\text{O}_2]$                                          | [1]  |
| 148 | $\text{CH}_3\text{O}_2\text{NO}_2 \rightarrow \text{CH}_3\text{O}_2 + \text{NO}_2$               | KMT14                                                                                            | [1]  |
| 149 | $\text{CH}_3\text{OH} + \text{OH} \rightarrow \text{HO}_2 + \text{HCHO}$                         | $2.85\text{D}-12 \cdot \exp(-345/T)$                                                             | [1]  |
| 150 | $\text{CH}_3\text{SO}_2 + \text{O}_3 \rightarrow \text{CH}_3\text{SO}_3$                         | 3.00D-13                                                                                         | [1]  |
| 151 | $\text{CH}_3\text{SO}_2 \rightarrow \text{CH}_3\text{O}_2 + \text{SO}_2$                         | $5.00\text{D}+13 \cdot \exp(-9673/T)$                                                            | [1]  |
| 152 | $\text{CH}_3\text{SO}_2 \rightarrow \text{CH}_3\text{SO}_2\text{O}_2$                            | $1.03\text{D}-16 \cdot \exp(1580/T) \cdot [\text{O}_2]$                                          | [1]  |
| 153 | $\text{CH}_3\text{SO}_2 + \text{OH} \rightarrow \text{MSA}$                                      | 5D-11                                                                                            | [2]  |
| 154 | $\text{CH}_3\text{SO}_2 + \text{NO}_2 \rightarrow \text{CH}_3\text{SO}_3 + \text{NO}$            | 2.2D-11                                                                                          | [2]  |
| 155 | $\text{CH}_3\text{SOO}_2 + \text{HO}_2 \rightarrow \text{CH}_3\text{SO}_2 + \text{OH}$           | KAPHO <sub>2</sub> ·0.44                                                                         | [1]  |
| 156 | $\text{CH}_3\text{SOO}_2 + \text{HO}_2 \rightarrow \text{CH}_3\text{SOOOH}$                      | KAPHO <sub>2</sub> ·0.41                                                                         | [1]  |
| 157 | $\text{CH}_3\text{SOO}_2 + \text{HO}_2 \rightarrow \text{MSIA} + \text{O}_3$                     | KAPHO <sub>2</sub> ·0.15                                                                         | [1]  |
| 158 | $\text{CH}_3\text{SOO}_2 + \text{NO} \rightarrow \text{CH}_3\text{SO}_2 + \text{NO}_2$           | 1.00D-11                                                                                         | [1]  |

[1] MCMv3.3.1 ; [2] Hoffmann et al. (2016) ; [3] Wu et al. (2014) ; [4] Berndt et al. (2019) ; [5] Kukui et al. (2003)  
 [6] Atkinson et al. (2007) ; [7] Sander et al. (2006) ; [8] Atkinson et al. (2008) ; [9] Braeuer et al. (2013) ; [10] Jacobson (2005)  
 [11] Demore et al. (1997) ; [12] Berndt et al. (2020) ; [13] Kahan et al. (2012) ; [14] Burkholder et al. (2015)  
 [E] Estimate based on equilibrium coefficients ; [C] Based on pKa value from COSMOtherm ; [A] Assumed

| #   | Reaction                                                                                                    | Rate                                                                                    | Ref.        |
|-----|-------------------------------------------------------------------------------------------------------------|-----------------------------------------------------------------------------------------|-------------|
| 159 | $\text{CH}_3\text{SOO}_2 + \text{NO}_2 \rightarrow \text{CH}_3\text{SOO}_2\text{NO}_2$                      | $1.20\text{D}-12 \cdot (\text{T}/300)^{-0.9}$                                           | [1]         |
| 160 | $\text{CH}_3\text{SOO}_2 + \text{NO}_3 \rightarrow \text{CH}_3\text{SO}_2 + \text{NO}_2$                    | $\text{KRO}_2\text{NO}_3 \cdot 1.74$                                                    | [1]         |
| 161 | $\text{CH}_3\text{SOO}_2 \rightarrow \text{CH}_3\text{SO}$                                                  | $9.10\text{D}+10 \cdot \exp(-3560/\text{T})$                                            | [1]         |
| 162 | $\text{CH}_3\text{SOO}_2 \rightarrow \text{CH}_3\text{SO}_2$                                                | $1.00\text{D}-11 \cdot \text{RO}_2 \cdot 0.7$                                           | [1]         |
| 163 | $\text{CH}_3\text{SOO}_2 \rightarrow \text{MSIA}$                                                           | $1.00\text{D}-11 \cdot \text{RO}_2 \cdot 0.3$                                           | [1]         |
| 164 | $\text{CH}_3\text{SO}_3 + \text{HO}_2 \rightarrow \text{MSA}$                                               | $5.00\text{D}-11$                                                                       | [1]         |
| 165 | $\text{CH}_3\text{SO}_3 \rightarrow \text{CH}_3\text{O}_2 + \text{SO}_3$                                    | $5.00\text{D}+13 \cdot \exp(-9946/\text{T})$                                            | [1]         |
| 166 | $\text{CH}_3\text{SO}_2\text{O}_2 + \text{HO}_2 \rightarrow \text{CH}_3\text{SO}_2\text{OOH}$               | $\text{KAPHO}_2 \cdot 0.41$                                                             | [1]         |
| 167 | $\text{CH}_3\text{SO}_2\text{O}_2 + \text{HO}_2 \rightarrow \text{CH}_3\text{SO}_3 + \text{OH}$             | $\text{KAPHO}_2 \cdot 0.44$                                                             | [1]         |
| 168 | $\text{CH}_3\text{SO}_2\text{O}_2 + \text{HO}_2 \rightarrow \text{MSA} + \text{O}_3$                        | $\text{KAPHO}_2 \cdot 0.15$                                                             | [1]         |
| 169 | $\text{CH}_3\text{SO}_2\text{O}_2 + \text{NO} \rightarrow \text{CH}_3\text{SO}_3 + \text{NO}_2$             | $1.00\text{D}-11$                                                                       | [1]         |
| 170 | $\text{CH}_3\text{SO}_2\text{O}_2 + \text{NO}_2 \rightarrow \text{CH}_3\text{SO}_4\text{NO}_2$              | $1.20\text{D}-12 \cdot (\text{T}/300)^{0.9}$                                            | [1]         |
| 171 | $\text{CH}_3\text{SO}_2\text{O}_2 + \text{NO}_3 \rightarrow \text{CH}_3\text{SO}_3 + \text{NO}_2$           | $\text{KRO}_2\text{NO}_3 \cdot 1.74$                                                    | [1]         |
| 172 | $\text{CH}_3\text{SO}_2\text{O}_2 \rightarrow \text{CH}_3\text{SO}_2$                                       | $3.01\text{D}+10 \cdot \exp(-3560/\text{T})$                                            | [1]         |
| 173 | $\text{CH}_3\text{SO}_2\text{O}_2 \rightarrow \text{CH}_3\text{SO}_3$                                       | $1.00\text{D}-11 \cdot \text{RO}_2 \cdot 0.7$                                           | [1]         |
| 174 | $\text{CH}_3\text{SO}_2\text{O}_2 \rightarrow \text{MSA}$                                                   | $1.00\text{D}-11 \cdot \text{RO}_2 \cdot 0.3$                                           | [1]         |
| 175 | $\text{CH}_3\text{SOOOH} + \text{OH} \rightarrow \text{CH}_3\text{SOO}_2$                                   | $9.00\text{D}-11$                                                                       | [1]         |
| 176 | $\text{CH}_3\text{SOOOH} \rightarrow \text{CH}_3\text{SO}_2 + \text{OH}$                                    | $\text{J}(41)$                                                                          | [1]         |
| 177 | $\text{CH}_3\text{SOO}_2\text{NO}_2 + \text{OH} \rightarrow \text{MSIA} + \text{NO}_2$                      | $1.00\text{D}-11$                                                                       | [1]         |
| 178 | $\text{CH}_3\text{SOO}_2\text{NO}_2 \rightarrow \text{CH}_3\text{SOO}_2 + \text{NO}_2$                      | $5.40\text{D}+16 \cdot \exp(-13112/\text{T})$                                           | [1]         |
| 179 | $\text{MSA} + \text{OH} \rightarrow \text{CH}_3\text{SO}_3$                                                 | $2.24\text{D}-14$                                                                       | [1]         |
| 180 | $\text{CH}_3\text{SO}_2\text{OOH} + \text{OH} \rightarrow \text{CH}_3\text{SO}_2\text{O}_2$                 | $3.60\text{D}-12$                                                                       | [1]         |
| 181 | $\text{CH}_3\text{SO}_2\text{OOH} \rightarrow \text{CH}_3\text{SO}_3 + \text{OH}$                           | $\text{J}(41)$                                                                          | [1]         |
| 182 | $\text{CH}_3\text{SO}_4\text{NO}_2 + \text{OH} \rightarrow \text{CH}_3\text{SO}_2\text{O}_2 + \text{HNO}_3$ | $3.60\text{D}-13$                                                                       | [1]         |
| 183 | $\text{CH}_3\text{SO}_4\text{NO}_2 \rightarrow \text{CH}_3\text{SO}_2\text{O}_2 + \text{NO}_2$              | $5.40\text{D}+16 \cdot \exp(-13112/\text{T})$                                           | [1]         |
| 184 | $\text{Cl} + \text{O}_3 \rightarrow \text{ClO}$                                                             | $2.8\text{D}-11 \cdot \exp(-250/\text{T})$                                              | [9] [2] [6] |
| 185 | $\text{Cl} + \text{H}_2 \rightarrow \text{HCl} + \text{HO}_2$                                               | $3.9\text{D}-11 \cdot \exp(-2310/\text{T})$                                             | [9] [2] [6] |
| 186 | $\text{Cl} + \text{HO}_2 \rightarrow \text{HCl}$                                                            | $3.4\text{D}-11$                                                                        | [9] [2] [6] |
| 187 | $\text{Cl} + \text{HO}_2 \rightarrow \text{ClO} + \text{OH}$                                                | $6.3\text{D}-11 \cdot \exp(-570/\text{T})$                                              | [9] [2] [6] |
| 188 | $\text{Cl} + \text{H}_2\text{O}_2 \rightarrow \text{HCl} + \text{HO}_2$                                     | $1.1\text{D}-11 \cdot \exp(-980/\text{T})$                                              | [9] [2] [6] |
| 189 | $\text{Cl}_2 + \text{OH} \rightarrow \text{HOCl} + \text{Cl}$                                               | $3.6\text{D}-12 \cdot \exp(-1200/\text{T})$                                             | [9] [2] [6] |
| 190 | $\text{ClO} + \text{O}_3 \rightarrow \text{ClO}_2$                                                          | $1.13\text{D}-17 \cdot \exp(-3600 \cdot (1\text{D}0/\text{T}-1\text{D}0/298\text{D}0))$ | [9] [2]     |
| 191 | $\text{ClO} + \text{O}_3 \rightarrow \text{OClO}$                                                           | $1.48\text{D}-18 \cdot \exp(-4000 \cdot (1\text{D}0/\text{T}-1\text{D}0/298\text{D}0))$ | [9] [2]     |
| 192 | $\text{ClO} + \text{OH} \rightarrow \text{HO}_2 + \text{Cl}$                                                | $0.94 \cdot 7.3\text{D}-12 \cdot \exp(300/\text{T})$                                    | [9] [2] [6] |
| 193 | $\text{ClO} + \text{OH} \rightarrow \text{HCl}$                                                             | $0.06 \cdot 7.3\text{D}-12 \cdot \exp(300/\text{T})$                                    | [9] [2] [6] |
| 194 | $\text{ClO} + \text{HO}_2 \rightarrow \text{HOCl}$                                                          | $2.2\text{D}-12 \cdot \exp(340/\text{T})$                                               | [9] [2] [6] |
| 195 | $\text{ClO} + \text{ClO} \rightarrow \text{Cl}_2$                                                           | $1\text{D}-12 \cdot \exp(-1590/\text{T})$                                               | [9] [2] [6] |

[1] MCMv3.3.1 ; [2] Hoffmann et al. (2016) ; [3] Wu et al. (2014) ; [4] Berndt et al. (2019) ; [5] Kukui et al. (2003)

[6] Atkinson et al. (2007) ; [7] Sander et al. (2006) ; [8] Atkinson et al. (2008) ; [9] Braeuer et al. (2013) ; [10] Jacobson (2005)

[11] Demore et al. (1997) ; [12] Berndt et al. (2020) ; [13] Kahan et al. (2012) ; [14] Burkholder et al. (2015)

[E] Estimate based on equilibrium coefficients ; [C] Based on pKa value from COSMOtherm ; [A] Assumed

| #   | Reaction                                                                                  | Rate                                                                                                          | Ref.        |
|-----|-------------------------------------------------------------------------------------------|---------------------------------------------------------------------------------------------------------------|-------------|
| 196 | $\text{ClO} + \text{ClO} \rightarrow \text{Cl} + \text{ClO}_2$                            | $3\text{D}\cdot 11 \cdot \exp(-2450/\text{T})$                                                                | [9] [2] [6] |
| 197 | $\text{ClO} + \text{ClO} \rightarrow \text{Cl} + \text{OCIO}$                             | $3.5\text{D}\cdot 13 \cdot \exp(-1370/\text{T})$                                                              | [9] [2] [6] |
| 198 | $\text{ClO} + \text{ClO} \rightarrow \text{Cl}_2\text{O}_2$                               | KMT46, 1.52D-15                                                                                               | [9] [2]     |
| 199 | $\text{Cl} \rightarrow \text{ClO}_2$                                                      | KMT47·[O <sub>2</sub> ], 5.17D-14·[O <sub>2</sub> ]                                                           | [9] [2]     |
| 200 | $\text{ClO}_2 \rightarrow \text{Cl}$                                                      | $2.8\text{D}\cdot 10 \cdot \exp(-1820/\text{T}) \cdot [\text{N}_2]$                                           | [9] [2] [6] |
| 201 | $\text{Cl} + \text{ClO}_2 \rightarrow \text{Cl}_2$                                        | $0.95 \cdot 2.42\text{D}\cdot 10$                                                                             | [9] [2] [7] |
| 202 | $\text{Cl} + \text{ClO}_2 \rightarrow \text{ClO} + \text{ClO}$                            | $0.05 \cdot 2.42\text{D}\cdot 10$                                                                             | [9] [2] [7] |
| 203 | $\text{Cl}_2\text{O}_2 \rightarrow \text{ClO} + \text{ClO}$                               | KMT48, 2.87D-3                                                                                                | [9] [2]     |
| 204 | $\text{Cl}_2\text{O}_2 + \text{O}_3 \rightarrow \text{ClO} + \text{ClO}_2$                | 1D-19                                                                                                         | [9] [2] [6] |
| 205 | $\text{Cl}_2\text{O}_2 + \text{Cl} \rightarrow \text{Cl}_2 + \text{ClO}_2$                | $7.6\text{D}\cdot 11 \cdot \exp(65/\text{T})$                                                                 | [9] [2] [6] |
| 206 | $\text{OCIO} + \text{OH} \rightarrow \text{HOCl}$                                         | $1.4\text{D}\cdot 12 \cdot \exp(600/\text{T})$                                                                | [9] [2] [6] |
| 207 | $\text{Cl} + \text{OCIO} \rightarrow \text{ClO} + \text{ClO}$                             | $3.2\text{D}\cdot 11 \cdot \exp(170/\text{T})$                                                                | [9] [2] [6] |
| 208 | $\text{ClO} + \text{OCIO} \rightarrow \text{Cl}_2\text{O}_3$                              | KMT49, 1.08D-19                                                                                               | [9] [2]     |
| 209 | $\text{Cl}_2\text{O}_3 \rightarrow \text{ClO} + \text{OCIO}$                              | KMT50 + J(65), 6.17D-2                                                                                        | [9] [2]     |
| 210 | $\text{HCl} + \text{OH} \rightarrow \text{Cl}$                                            | $1.7\text{D}\cdot 12 \cdot \exp(-230/\text{T})$                                                               | [9] [2] [6] |
| 211 | $\text{HOCl} + \text{OH} \rightarrow \text{ClO}$                                          | $5.60\text{D}\cdot 13 \cdot \exp(-500 \cdot (1\text{D}0/\text{T} - 1\text{D}0/298\text{D}0))$                 | [9] [2] [7] |
| 212 | $\text{HOCl} + \text{Cl} \rightarrow \text{HCl} + \text{ClO}$                             | $0.76 \cdot 1.62\text{D}\cdot 12 \cdot \exp(-130 \cdot (1\text{D}0/\text{T} - 1\text{D}0/298\text{D}0))$      | [9] [2] [7] |
| 213 | $\text{HOCl} + \text{Cl} \rightarrow \text{Cl}_2 + \text{OH}$                             | $0.24 \cdot 1.62\text{D}\cdot 12 \cdot \exp(-130 \cdot (1\text{D}0/\text{T} - 1\text{D}0/298\text{D}0))$      | [9] [2] [7] |
| 214 | $\text{ClO} + \text{NO} \rightarrow \text{Cl} + \text{NO}_2$                              | $6.2\text{D}\cdot 12 \cdot \exp(295/\text{T})$                                                                | [9] [2] [6] |
| 215 | $\text{OCIO} + \text{NO} \rightarrow \text{ClO} + \text{NO}_2$                            | $1.16\text{D}\cdot 13 \cdot \exp(350/\text{T})$                                                               | [9] [2] [6] |
| 216 | $\text{Cl} + \text{NO}_3 \rightarrow \text{ClO} + \text{NO}_2$                            | 2.40D-11                                                                                                      | [9] [2] [6] |
| 217 | $\text{ClO} + \text{NO}_3 \rightarrow \text{ClO}_2 + \text{NO}_2$                         | 0.68·4.61D-13                                                                                                 | [9] [2] [6] |
| 218 | $\text{ClO} + \text{NO}_3 \rightarrow \text{OCIO} + \text{NO}_2$                          | 0.32·4.61D-13                                                                                                 | [9] [2] [6] |
| 219 | $\text{Cl} + \text{NO} \rightarrow \text{ClNO}$                                           | KMT51, 1.92D-12                                                                                               | [9] [2]     |
| 220 | $\text{Cl} + \text{ClNO} \rightarrow \text{Cl}_2 + \text{NO}$                             | $8.11\text{D}\cdot 11 \cdot \exp(100 \cdot (1\text{D}0/\text{T} - 1\text{D}0/298\text{D}0))$                  | [9] [2] [7] |
| 221 | $\text{Cl} + \text{NO}_2 \rightarrow \text{ClNO}_2$                                       | KMT52, 5.80D-14                                                                                               | [9] [2]     |
| 222 | $\text{ClNO}_2 + \text{OH} \rightarrow \text{HOCl} + \text{NO}_2$                         | $3.62\text{D}\cdot 14 \cdot \exp(-1250 \cdot (1\text{D}0/\text{T} - 1\text{D}0/298\text{D}0))$                | [9] [2] [7] |
| 223 | $\text{ClO} + \text{NO}_2 \rightarrow \text{ClNO}_3$                                      | KMT53, 1.85D-19                                                                                               | [9] [2]     |
| 224 | $\text{ClNO}_3 \rightarrow \text{ClO} + \text{NO}_2$                                      | $1.47\text{D}\cdot 3 \cdot \exp(-11438 \cdot (1\text{D}0/\text{T} - 1\text{D}0/298\text{D}0)) + \text{J}(70)$ | [9] [2]     |
| 225 | $\text{ClNO}_3 + \text{OH} \rightarrow \text{ClO} + \text{HNO}_3$                         | $0.5 \cdot 1.2\text{D}\cdot 12 \cdot \exp(-330/\text{T})$                                                     | [9] [2] [6] |
| 226 | $\text{ClNO}_3 + \text{OH} \rightarrow \text{HOCl} + \text{NO}_3$                         | $0.5 \cdot 1.2\text{D}\cdot 12 \cdot \exp(-330/\text{T})$                                                     | [9] [2] [6] |
| 227 | $\text{ClNO}_3 + \text{Cl} \rightarrow \text{Cl}_2 + \text{NO}_3$                         | $6.2\text{D}\cdot 12 \cdot \exp(145/\text{T})$                                                                | [9] [2] [6] |
| 228 | $\text{Cl} + \text{CH}_4 \rightarrow \text{CH}_3\text{O}_2 + \text{HCl}$                  | $6.6\text{D}\cdot 12 \cdot \exp(-1240/\text{T})$                                                              | [9] [2]     |
| 229 | $\text{Cl} + \text{CH}_3\text{OOH} \rightarrow \text{CH}_3\text{O}_2 + \text{HCl}$        | 5.7D-11                                                                                                       | [9] [2]     |
| 230 | $\text{Cl} + \text{CH}_3\text{O}_2 \rightarrow \text{HCHO} + \text{ClO}$                  | $0.5 \cdot 1.60\text{D}\cdot 10$                                                                              | [9] [2] [7] |
| 231 | $\text{Cl} + \text{CH}_3\text{O}_2 \rightarrow \text{HO}_2 + \text{HCl} + \text{HCOOH}$   | $0.5 \cdot 1.60\text{D}\cdot 10$                                                                              | [9] [2] [7] |
| 232 | $\text{ClO} + \text{CH}_3\text{O}_2 \rightarrow \text{ClO}_2 + \text{HCHO} + \text{HO}_2$ | $1.63\text{D}\cdot 12 \cdot \exp(-238 \cdot (1\text{D}0/\text{T} - 1\text{D}0/298\text{D}0))$                 | [9] [2]     |

[1] MCMv3.3.1 ; [2] Hoffmann et al. (2016) ; [3] Wu et al. (2014) ; [4] Berndt et al. (2019) ; [5] Kukui et al. (2003)  
 [6] Atkinson et al. (2007) ; [7] Sander et al. (2006) ; [8] Atkinson et al. (2008) ; [9] Braeuer et al. (2013) ; [10] Jacobson (2005)  
 [11] Demore et al. (1997) ; [12] Berndt et al. (2020) ; [13] Kahan et al. (2012) ; [14] Burkholder et al. (2015)  
 [E] Estimate based on equilibrium coefficients ; [C] Based on pKa value from COSMOtherm ; [A] Assumed

| #   | Reaction                                                                                        | Rate                                                                                                               | Ref.        |
|-----|-------------------------------------------------------------------------------------------------|--------------------------------------------------------------------------------------------------------------------|-------------|
| 233 | $\text{Cl} + \text{HCHO} \rightarrow \text{HCl} + \text{CO} + \text{HO}_2$                      | $7.23\text{D}-11 \cdot \exp(-34 \cdot (1\text{D}0/\text{T}-1\text{D}0/298\text{D}0))$                              | [9] [2]     |
| 234 | $\text{ClO} + \text{HCHO} \rightarrow \text{HOCl} + \text{CO} + \text{HO}_2$                    | $8.7\text{D}-16 \cdot \exp(-2100 \cdot (1\text{D}0/\text{T}-1\text{D}0/298\text{D}0))$                             | [9] [2]     |
| 235 | $\text{Cl} + \text{CH}_3\text{CHO} \rightarrow \text{HCl} + \text{CH}_3\text{CO}_3$             | 8D-11                                                                                                              | [9] [2]     |
| 236 | $\text{Cl}_2 \rightarrow \text{Cl} + \text{Cl}$                                                 | J(61)                                                                                                              | [9] [2] [7] |
| 237 | $\text{ClO} \rightarrow \text{Cl} + \text{O}$                                                   | J(62)                                                                                                              | [9] [2] [7] |
| 238 | $\text{OCIO} \rightarrow \text{ClO} + \text{O}$                                                 | J(63)                                                                                                              | [9] [2] [7] |
| 239 | $\text{Cl}_2\text{O}_2 \rightarrow \text{Cl} + \text{ClO}_2$                                    | J(64)                                                                                                              | [9] [2] [7] |
| 240 | $\text{Cl}_2\text{O}_3 \rightarrow \text{ClO} + \text{OCIO}$                                    | J(65)                                                                                                              | [9] [2] [6] |
| 241 | $\text{HOCl} \rightarrow \text{Cl} + \text{OH}$                                                 | J(66)                                                                                                              | [9] [2] [6] |
| 242 | $\text{ClNO} \rightarrow \text{Cl} + \text{NO}$                                                 | J(67)                                                                                                              | [9] [2] [6] |
| 243 | $\text{ClNO}_2 \rightarrow \text{Cl} + \text{NO}_2$                                             | J(68)                                                                                                              | [9] [2] [6] |
| 244 | $\text{ClNO}_3 \rightarrow \text{Cl} + \text{NO}_3$                                             | J(69)                                                                                                              | [9] [2] [7] |
| 245 | $\text{ClNO}_3 \rightarrow \text{ClO} + \text{NO}_2$                                            | J(70)                                                                                                              | [9] [2] [7] |
| 246 | $\text{CH}_3\text{SOCH}_2\text{OOH} \rightarrow \text{CH}_3\text{SO} + \text{HCHO} + \text{OH}$ | J(41)                                                                                                              | [9] [2]     |
| 247 | $\text{CH}_3\text{SCH}_2\text{Cl} \rightarrow \text{CH}_3\text{S} + \text{CH}_2\text{ClO}_2$    | J(71)                                                                                                              | [9] [2]     |
| 248 | $\text{CH}_3\text{SOOH} \rightarrow \text{CH}_3\text{SO} + \text{OH}$                           | J(41)                                                                                                              | [9] [2]     |
| 249 | $\text{CH}_3\text{Cl} + \text{OH} \rightarrow \text{CH}_2\text{ClO}_2$                          | $7.33\text{D}-18 \cdot \text{T}^{-2} \cdot \exp(-809/\text{T})$                                                    | [9] [2]     |
| 250 | $\text{CH}_3\text{Cl} + \text{Cl} \rightarrow \text{CH}_2\text{ClO}_2 + \text{HCl}$             | $4.85\text{D}-13 \cdot \exp(-1150 \cdot (1\text{D}0/\text{T}-1\text{D}0/298\text{D}0))$                            | [9] [2]     |
| 251 | $\text{CH}_2\text{ClO}_2 + \text{HO}_2 \rightarrow \text{CH}_2\text{ClOOH}$                     | $3.2\text{D}-13 \cdot \exp(820/\text{T}) \cdot 0.3$                                                                | [1]         |
| 252 | $\text{CH}_2\text{ClO}_2 + \text{HO}_2 \rightarrow \text{CHOCl}$                                | $3.2\text{D}-13 \cdot \exp(820/\text{T}) \cdot 0.7$                                                                | [1]         |
| 253 | $\text{CH}_2\text{ClO}_2 + \text{NO} \rightarrow \text{CH}_2\text{ClO} + \text{NO}_2$           | $\text{KRO}_2\text{NO} \cdot 1.5$                                                                                  | [9] [2]     |
| 254 | $\text{CH}_2\text{ClO}_2 + \text{NO}_3 \rightarrow \text{CH}_2\text{ClO} + \text{NO}_2$         | $\text{KRO}_2\text{NO}_3$                                                                                          | [9] [2]     |
| 255 | $\text{CH}_2\text{ClO}_2 \rightarrow \text{CH}_2\text{ClO}$                                     | $2 \cdot (\text{KCH}_3\text{O}_2 \cdot 1.9\text{D}-13 \cdot \exp(870/\text{T}))^{0.5} \cdot \text{RO}_2 \cdot 0.6$ | [1]         |
| 256 | $\text{CH}_2\text{ClO}_2 \rightarrow \text{CH}_2\text{ClOH}$                                    | $2 \cdot (\text{KCH}_3\text{O}_2 \cdot 1.9\text{D}-13 \cdot \exp(870/\text{T}))^{0.5} \cdot \text{RO}_2 \cdot 0.2$ | [1]         |
| 257 | $\text{CH}_2\text{ClO}_2 \rightarrow \text{CHOCl}$                                              | $2 \cdot (\text{KCH}_3\text{O}_2 \cdot 1.9\text{D}-13 \cdot \exp(870/\text{T}))^{0.5} \cdot \text{RO}_2 \cdot 0.2$ | [1]         |
| 258 | $\text{CH}_2\text{ClOOH} + \text{OH} \rightarrow \text{CH}_2\text{ClO}_2$                       | $1.90\text{D}-12 \cdot \exp(190/\text{T})$                                                                         | [1]         |
| 259 | $\text{CH}_2\text{ClOOH} + \text{OH} \rightarrow \text{CHOCl} + \text{OH}$                      | 4.14D-12                                                                                                           | [1]         |
| 260 | $\text{CH}_2\text{ClOOH} \rightarrow \text{CH}_2\text{ClO} + \text{OH}$                         | J(41)                                                                                                              | [1]         |
| 261 | $\text{CHOCl} + \text{NO}_3 \rightarrow \text{CO} + \text{Cl} + \text{HNO}_3$                   | $\text{KNO}_3\text{AL}$                                                                                            | [1]         |
| 262 | $\text{CHOCl} + \text{OH} \rightarrow \text{CO} + \text{Cl}$                                    | 6.12D-12                                                                                                           | [1]         |
| 263 | $\text{CHOCl} \rightarrow \text{HO}_2 + \text{CO} + \text{Cl}$                                  | J(11)                                                                                                              | [1]         |
| 264 | $\text{CH}_2\text{ClO} \rightarrow \text{CHOCl} + \text{HO}_2$                                  | $\text{KROPRIM} \cdot [\text{O}_2]$                                                                                | [1]         |
| 265 | $\text{CH}_2\text{ClOH} + \text{OH} \rightarrow \text{CHOCl} + \text{HO}_2$                     | 1.08D-12                                                                                                           | [1]         |
| 266 | $\text{DMS} + \text{Br} \rightarrow \text{CH}_3\text{SCH}_2\text{O}_2 + \text{HBr}$             | $9\text{D}-11 \cdot \exp(-2390/\text{T})$                                                                          | [9] [2]     |
| 267 | $\text{DMS} + \text{Br} \rightarrow \text{CH}_3\text{SCH}_3\text{Br}$                           | KMT54                                                                                                              | [9] [2]     |
| 268 | $\text{DMS} + \text{BrO} \rightarrow \text{DMSO} + \text{Br}$                                   | $1.5\text{D}-14 \cdot \exp(1000/\text{T})$                                                                         | [9] [2]     |
| 269 | $\text{CH}_3\text{SCH}_3\text{Br} \rightarrow \text{DMSO} + \text{BrO}$                         | $1\text{D}-18 \cdot [\text{O}_2]$                                                                                  | [9] [2]     |

[1] MCMv3.3.1 ; [2] Hoffmann et al. (2016) ; [3] Wu et al. (2014) ; [4] Berndt et al. (2019) ; [5] Kukui et al. (2003)

[6] Atkinson et al. (2007) ; [7] Sander et al. (2006) ; [8] Atkinson et al. (2008) ; [9] Braeuer et al. (2013) ; [10] Jacobson (2005)

[11] Demore et al. (1997) ; [12] Berndt et al. (2020) ; [13] Kahan et al. (2012) ; [14] Burkholder et al. (2015)

[E] Estimate based on equilibrium coefficients ; [C] Based on pKa value from COSMOtherm ; [A] Assumed



| #   | Reaction                                                                               | Rate                                                                                                   | Ref.        |
|-----|----------------------------------------------------------------------------------------|--------------------------------------------------------------------------------------------------------|-------------|
| 270 | $\text{CH}_3\text{SCH}_3\text{Br} \rightarrow \text{DMS} + \text{Br}$                  | 1.02D4                                                                                                 | [9] [2]     |
| 271 | $\text{DMSO} + \text{BrO} \rightarrow \text{DMSO}_2 + \text{Br}$                       | 1D-14                                                                                                  | [9] [2]     |
| 272 | $\text{Br} + \text{O}_3 \rightarrow \text{BrO}$                                        | $1.7\text{D}-11 \cdot \exp(-800/\text{T})$                                                             | [9] [2] [6] |
| 273 | $\text{Br} + \text{HO}_2 \rightarrow \text{HBr}$                                       | $7.7\text{D}-12 \cdot \exp(-450/\text{T})$                                                             | [9] [2] [6] |
| 274 | $\text{Br} + \text{H}_2\text{O}_2 \rightarrow \text{HBr} + \text{HO}_2$                | 5D-16                                                                                                  | [9] [2] [6] |
| 275 | $\text{Br}_2 + \text{OH} \rightarrow \text{HOBr} + \text{Br}$                          | $2\text{D}-11 \cdot \exp(240/\text{T})$                                                                | [9] [2] [6] |
| 276 | $\text{BrO} + \text{O}_3 \rightarrow \text{Br}$                                        | 0.9-2D-17                                                                                              | [9] [2] [6] |
| 277 | $\text{BrO} + \text{O}_3 \rightarrow \text{OBrO}$                                      | 0.1-2D-17                                                                                              | [9] [2] [6] |
| 278 | $\text{BrO} + \text{OH} \rightarrow \text{Br} + \text{HO}_2$                           | $1.8\text{D}-11 \cdot \exp(250/\text{T})$                                                              | [9] [2] [6] |
| 279 | $\text{BrO} + \text{HO}_2 \rightarrow \text{HOBr}$                                     | $4.5\text{D}-12 \cdot \exp(500/\text{T})$                                                              | [9] [2] [6] |
| 280 | $\text{BrO} + \text{BrO} \rightarrow \text{Br} + \text{Br}$                            | 0.85-2.7D-12                                                                                           | [9] [2] [6] |
| 281 | $\text{BrO} + \text{BrO} \rightarrow \text{Br}_2$                                      | 0.15-2.7D-12                                                                                           | [9] [2] [6] |
| 282 | $\text{HBr} + \text{OH} \rightarrow \text{Br}$                                         | $6.7\text{D}-12 \cdot \exp(155/\text{T})$                                                              | [9] [2] [6] |
| 283 | $\text{Br} + \text{NO}_2 \rightarrow \text{BrNO}_2$                                    | KMT55                                                                                                  | [9] [2] [6] |
| 284 | $\text{Br} + \text{NO}_3 \rightarrow \text{BrO} + \text{NO}_2$                         | 1.6D-11                                                                                                | [9] [2] [6] |
| 285 | $\text{BrO} + \text{NO} \rightarrow \text{Br} + \text{NO}_2$                           | $8.7\text{D}-12 \cdot \exp(260/\text{T})$                                                              | [9] [2] [6] |
| 286 | $\text{BrO} + \text{NO}_2 \rightarrow \text{BrNO}_3$                                   | KMT56                                                                                                  | [9] [2] [6] |
| 287 | $\text{BrNO}_3 \rightarrow \text{BrO} + \text{NO}_2$                                   | $2.75\text{D}-5 \cdot \exp(-12360 \cdot (1\text{D}0/\text{T}-1\text{D}0/298\text{D}0)) + \text{J}(78)$ | [9] [2]     |
| 288 | $\text{BrNO}_3 + \text{Br} \rightarrow \text{Br}_2 + \text{NO}_3$                      | 4.9D-11                                                                                                | [9] [2]     |
| 289 | $\text{HBr} + \text{NO}_3 \rightarrow \text{Br} + \text{HNO}_3$                        | 1D-16                                                                                                  | [9] [2] [6] |
| 290 | $\text{Br} + \text{Cl}_2\text{O}_2 \rightarrow \text{BrCl} + \text{ClO}_2$             | $5.9\text{D}-12 \cdot \exp(-170/\text{T})$                                                             | [9] [2] [6] |
| 291 | $\text{Br} + \text{OCIO} \rightarrow \text{BrO} + \text{ClO}$                          | $2.7\text{D}-11 \cdot \exp(-1300/\text{T})$                                                            | [9] [2] [6] |
| 292 | $\text{BrO} + \text{ClO} \rightarrow \text{Br} + \text{OCIO}$                          | $1.6\text{D}-12 \cdot \exp(430/\text{T})$                                                              | [9] [2] [6] |
| 293 | $\text{BrO} + \text{ClO} \rightarrow \text{Br} + \text{ClO}_2$                         | $2.9\text{D}-12 \cdot \exp(220/\text{T})$                                                              | [9] [2] [6] |
| 294 | $\text{BrO} + \text{ClO} \rightarrow \text{BrCl}$                                      | $5.8\text{D}-13 \cdot \exp(170/\text{T})$                                                              | [9] [2] [6] |
| 295 | $\text{Br}_2 + \text{Cl} \rightarrow \text{BrCl} + \text{Br}$                          | $3.62\text{D}-10 \cdot \exp(135 \cdot (1\text{D}0/\text{T}-1\text{D}0/298\text{D}0))$                  | [9] [2]     |
| 296 | $\text{BrCl} + \text{Br} \rightarrow \text{Br}_2 + \text{Cl}$                          | 3.32D-15                                                                                               | [9] [2]     |
| 297 | $\text{Br} + \text{Cl}_2 \rightarrow \text{BrCl} + \text{Cl}$                          | 1.1D-15                                                                                                | [9] [2]     |
| 298 | $\text{BrCl} + \text{Cl} \rightarrow \text{Br} + \text{Cl}_2$                          | 1.45D-11                                                                                               | [9] [2]     |
| 299 | $\text{Br} + \text{CH}_3\text{OOH} \rightarrow \text{HBr} + \text{CH}_3\text{O}_2$     | $1.18\text{D}-14 \cdot \exp(-1610 \cdot (1\text{D}0/\text{T}-1\text{D}0/298\text{D}0))$                | [9] [2]     |
| 300 | $\text{BrO} + \text{CH}_3\text{O}_2 \rightarrow \text{Br} + \text{HCHO} + \text{HO}_2$ | $0.25-6.01\text{D}-12 \cdot \exp(800 \cdot (1\text{D}0/\text{T}-1\text{D}0/298\text{D}0))$             | [9] [2]     |
| 301 | $\text{BrO} + \text{CH}_3\text{O}_2 \rightarrow \text{HOBr} + \text{HCOOH}$            | $0.75-6.01\text{D}-12 \cdot \exp(800 \cdot (1\text{D}0/\text{T}-1\text{D}0/298\text{D}0))$             | [9] [2]     |
| 302 | $\text{Br} + \text{HCHO} \rightarrow \text{HBr} + \text{CO} + \text{HO}_2$             | $1.161\text{D}-12 \cdot \exp(-800 \cdot (1\text{D}0/\text{T}-1\text{D}0/298\text{D}0))$                | [9] [2] [7] |
| 303 | $\text{BrO} + \text{HCHO} \rightarrow \text{HOBr} + \text{CO} + \text{HO}_2$           | 1.5D-14                                                                                                | [9] [2]     |
| 304 | $\text{Br} + \text{CH}_3\text{CHO} \rightarrow \text{HBr} + \text{CH}_3\text{CO}_3$    | $3.841\text{D}-12 \cdot \exp(-460 \cdot (1\text{D}0/\text{T}-1\text{D}0/298\text{D}0))$                | [9] [2]     |
| 305 | $\text{Br}_2 \rightarrow \text{Br} + \text{Br}$                                        | J(72)                                                                                                  | [9] [2] [6] |
| 306 | $\text{BrO} \rightarrow \text{Br} + \text{O}$                                          | J(73)                                                                                                  | [9] [2] [6] |

[1] MCMv3.3.1 ; [2] Hoffmann et al. (2016) ; [3] Wu et al. (2014) ; [4] Berndt et al. (2019) ; [5] Kukui et al. (2003)  
 [6] Atkinson et al. (2007) ; [7] Sander et al. (2006) ; [8] Atkinson et al. (2008) ; [9] Braeuer et al. (2013) ; [10] Jacobson (2005)  
 [11] Demore et al. (1997) ; [12] Berndt et al. (2020) ; [13] Kahan et al. (2012) ; [14] Burkholder et al. (2015)  
 [E] Estimate based on equilibrium coefficients ; [C] Based on pKa value from COSMOtherm ; [A] Assumed

| #   | Reaction                                                                              | Rate                                                                                              | Ref.        |
|-----|---------------------------------------------------------------------------------------|---------------------------------------------------------------------------------------------------|-------------|
| 307 | $\text{OBrO} \rightarrow \text{BrO} + \text{O}$                                       | J(74)                                                                                             | [9] [2] [6] |
| 308 | $\text{HOBr} \rightarrow \text{Br} + \text{OH}$                                       | J(75)                                                                                             | [9] [2] [6] |
| 309 | $\text{BrNO}_2 \rightarrow \text{Br} + \text{NO}_2$                                   | J(76)                                                                                             | [9] [2] [6] |
| 310 | $\text{BrNO}_3 \rightarrow \text{Br} + \text{NO}_3$                                   | J(77)                                                                                             | [9] [2] [6] |
| 311 | $\text{BrNO}_3 \rightarrow \text{BrO} + \text{NO}_2$                                  | J(78)                                                                                             | [9] [2] [6] |
| 312 | $\text{BrCl} \rightarrow \text{Br} + \text{Cl}$                                       | J(79)                                                                                             | [9] [2] [6] |
| 313 | $\text{DMS} + \text{IO} \rightarrow \text{DMSO} + \text{IODINE}$                      | $3.3\text{D}-13 \cdot \exp(-925/\text{T})$                                                        | [9] [2]     |
| 314 | $\text{IODINE} + \text{IODINE} \rightarrow \text{IODINE}_2$                           | 2.99D-11                                                                                          | [9] [2]     |
| 315 | $\text{IODINE} + \text{O}_3 \rightarrow \text{IO}$                                    | $2.1\text{D}-11 \cdot \exp(-830/\text{T})$                                                        | [9] [2] [6] |
| 316 | $\text{IODINE}_2 + \text{OH} \rightarrow \text{IODINE} + \text{HOI}$                  | 2.1D-10                                                                                           | [9] [2] [6] |
| 317 | $\text{IODINE} + \text{HO}_2 \rightarrow \text{HI}$                                   | $1.5\text{D}-11 \cdot \exp(-1090/\text{T})$                                                       | [9] [2] [6] |
| 318 | $\text{IO} + \text{HO}_2 \rightarrow \text{HOI}$                                      | $1.4\text{D}-11 \cdot \exp(540/\text{T})$                                                         | [9] [2] [6] |
| 319 | $\text{IO} + \text{IO} \rightarrow \text{I}_2\text{O}_2$                              | $0.485 \cdot 8.03\text{D}-11 \cdot \exp(500 \cdot (1\text{D}0/\text{T}-1\text{D}0/298\text{D}0))$ | [9] [2] [7] |
| 320 | $\text{IO} + \text{IO} \rightarrow \text{OIO} + \text{IODINE}$                        | $0.38 \cdot 8.03\text{D}-11 \cdot \exp(500 \cdot (1\text{D}0/\text{T}-1\text{D}0/298\text{D}0))$  | [9] [2] [7] |
| 321 | $\text{IO} + \text{IO} \rightarrow \text{IODINE}_2$                                   | $0.025 \cdot 8.03\text{D}-11 \cdot \exp(500 \cdot (1\text{D}0/\text{T}-1\text{D}0/298\text{D}0))$ | [9] [2] [7] |
| 322 | $\text{IO} + \text{IO} \rightarrow \text{IODINE} + \text{IODINE}$                     | $0.11 \cdot 8.03\text{D}-11 \cdot \exp(500 \cdot (1\text{D}0/\text{T}-1\text{D}0/298\text{D}0))$  | [9] [2] [7] |
| 323 | $\text{OIO} + \text{OH} \rightarrow \text{HIO}_3$                                     | 0.5-2D-10                                                                                         | [9] [2]     |
| 324 | $\text{OIO} + \text{OH} \rightarrow \text{HOI}$                                       | 0.5-2D-10                                                                                         | [9] [2]     |
| 325 | $\text{OIO} + \text{OIO} \rightarrow \text{I}_2\text{O}_2$                            | 5D-11                                                                                             | [9] [2]     |
| 326 | $\text{I}_2\text{O}_2 \rightarrow \text{IO} + \text{IO}$                              | 2D1                                                                                               | [9] [2]     |
| 327 | $\text{HI} + \text{OH} \rightarrow \text{IODINE}$                                     | $1.6\text{D}-11 \cdot \exp(440/\text{T})$                                                         | [9] [2] [6] |
| 328 | $\text{IODINE} + \text{NO} \rightarrow \text{INO}$                                    | KMT57                                                                                             | [9] [2] [6] |
| 329 | $\text{IODINE} + \text{NO}_2 \rightarrow \text{INO}_2$                                | KMT58                                                                                             | [9] [2] [6] |
| 330 | $\text{IODINE} + \text{NO}_3 \rightarrow \text{IO} + \text{NO}_2$                     | 4.5D-10                                                                                           | [9] [2]     |
| 331 | $\text{IODINE}_2 + \text{NO}_3 \rightarrow \text{IODINE} + \text{INO}_3$              | 1.5D-12                                                                                           | [9] [2] [6] |
| 332 | $\text{IO} + \text{NO} \rightarrow \text{IODINE} + \text{NO}_2$                       | $7.15\text{D}-12 \cdot \exp(300/\text{T})$                                                        | [9] [2] [6] |
| 333 | $\text{IO} + \text{NO}_2 \rightarrow \text{INO}_3$                                    | KMT59                                                                                             | [9] [2] [6] |
| 334 | $\text{OIO} + \text{NO} \rightarrow \text{IO} + \text{NO}_2$                          | $1.1\text{D}-12 \cdot \exp(542/\text{T})$                                                         | [9] [2] [6] |
| 335 | $\text{HI} + \text{NO}_3 \rightarrow \text{IODINE} + \text{HNO}_3$                    | $1.3\text{D}-12 \cdot \exp(-1830/\text{T})$                                                       | [9] [2] [6] |
| 336 | $\text{INO} + \text{INO} \rightarrow \text{IODINE}_2 + \text{NO} + \text{NO}$         | $8.5\text{D}-11 \cdot \exp(-2620/\text{T})$                                                       | [9] [2] [6] |
| 337 | $\text{INO}_2 + \text{INO}_2 \rightarrow \text{IODINE}_2 + \text{NO}_2 + \text{NO}_2$ | $4.7\text{D}-13 \cdot \exp(-1670/\text{T})$                                                       | [9] [2] [6] |
| 338 | $\text{INO}_2 \rightarrow \text{IODINE} + \text{NO}_2$                                | $9.8\text{D}-20 \cdot \text{M} + \text{J}(88)$                                                    | [9] [2]     |
| 339 | $\text{INO}_3 \rightarrow \text{IO} + \text{NO}_2$                                    | $4.5\text{D}-5 \cdot \exp(-12060/\text{T}) \cdot \text{M} + \text{J}(90)$                         | [9] [2] [6] |
| 340 | $\text{IODINE}_2 + \text{Cl} \rightarrow \text{IODINE} + \text{ICl}$                  | 2.1D-10                                                                                           | [9] [2]     |
| 341 | $\text{IODINE}_2 + \text{Br} \rightarrow \text{IODINE} + \text{IBr}$                  | 1.2D-10                                                                                           | [9] [2]     |
| 342 | $\text{IODINE} + \text{BrO} \rightarrow \text{IO} + \text{Br}$                        | 1.2D-11                                                                                           | [9] [2]     |
| 343 | $\text{IO} + \text{ClO} \rightarrow \text{OCIO} + \text{IODINE}$                      | $0.55 \cdot 4.7\text{D}-12 \cdot \exp(280/\text{T})$                                              | [9] [2] [6] |

[1] MCMv3.3.1 ; [2] Hoffmann et al. (2016) ; [3] Wu et al. (2014) ; [4] Berndt et al. (2019) ; [5] Kukui et al. (2003)  
 [6] Atkinson et al. (2007) ; [7] Sander et al. (2006) ; [8] Atkinson et al. (2008) ; [9] Braeuer et al. (2013) ; [10] Jacobson (2005)  
 [11] Demore et al. (1997) ; [12] Berndt et al. (2020) ; [13] Kahan et al. (2012) ; [14] Burkholder et al. (2015)  
 [E] Estimate based on equilibrium coefficients ; [C] Based on pKa value from COSMOtherm ; [A] Assumed

| #   | Reaction                                                                                                                                               | Rate                                                                                                                 | Ref.        |
|-----|--------------------------------------------------------------------------------------------------------------------------------------------------------|----------------------------------------------------------------------------------------------------------------------|-------------|
| 344 | $\text{IO} + \text{ClO} \rightarrow \text{Cl} + \text{IODINE}$                                                                                         | $0.25 \cdot 4.7\text{D} \cdot 12 \cdot \exp(280/\text{T})$                                                           | [9] [2] [6] |
| 345 | $\text{IO} + \text{ClO} \rightarrow \text{ICl}$                                                                                                        | $0.2 \cdot 4.7\text{D} \cdot 12 \cdot \exp(280/\text{T})$                                                            | [9] [2] [6] |
| 346 | $\text{IO} + \text{BrO} \rightarrow \text{OIO} + \text{Br}$                                                                                            | $0.8 \cdot 1.5\text{D} \cdot 11 \cdot \exp(510/\text{T})$                                                            | [9] [2] [6] |
| 347 | $\text{IO} + \text{BrO} \rightarrow \text{IODINE} + \text{Br}$                                                                                         | $0.2 \cdot 1.5\text{D} \cdot 11 \cdot \exp(510/\text{T})$                                                            | [9] [2] [6] |
| 348 | $\text{C}_3\text{H}_7\text{I} + \text{OH} \rightarrow \text{CH}_3\text{ClO}_2\text{CH}_3$                                                              | 1.6D-12                                                                                                              | [9] [2]     |
| 349 | $\text{CH}_3\text{ClO}_2\text{CH}_3 + \text{CH}_3\text{O}_2 \rightarrow \text{CH}_3\text{ClOCH}_3 + \text{HCHO} + \text{HO}_2$                         | 2.4D-14                                                                                                              | [9] [2]     |
| 350 | $\text{CH}_3\text{ClO}_2\text{CH}_3 + \text{CH}_3\text{ClO}_2\text{CH}_3 \rightarrow \text{CH}_3\text{ClOCH}_3 + \text{CH}_3\text{ClOCH}_3$            | $5.57\text{D} \cdot 16 \cdot \exp(-2200 \cdot (1\text{D}_0/\text{T} - 1\text{D}_0/298\text{D}_0))$                   | [9] [2]     |
| 351 | $\text{CH}_3\text{ClO}_2\text{CH}_3 + \text{NO} \rightarrow \text{CH}_3\text{ClOCH}_3 + \text{NO}_2$                                                   | $9.04\text{D} \cdot 12 \cdot \exp(360 \cdot (1\text{D}_0/\text{T} - 1\text{D}_0/298\text{D}_0))$                     | [9] [2]     |
| 352 | $\text{CH}_3\text{ClOCH}_3 \rightarrow \text{CH}_3\text{COCH}_3 + \text{IODINE}$                                                                       | 1D1                                                                                                                  | [9] [2]     |
| 353 | $\text{C}_2\text{H}_5\text{I} + \text{OH} \rightarrow \text{CH}_3\text{CHIO}_2$                                                                        | $0.13 \cdot 3.69\text{D} \cdot 13 \cdot \exp(-800 \cdot (1\text{D}_0/\text{T} - 1\text{D}_0/298\text{D}_0))$         | [9] [2]     |
| 354 | $\text{C}_2\text{H}_5\text{I} + \text{OH} \rightarrow \text{CH}_2\text{ICH}_2\text{O}_2$                                                               | $0.87 \cdot 3.69\text{D} \cdot 13 \cdot \exp(-800 \cdot (1\text{D}_0/\text{T} - 1\text{D}_0/298\text{D}_0))$         | [9] [2]     |
| 355 | $\text{CH}_2\text{ICH}_2\text{O}_2 + \text{CH}_3\text{O}_2 \rightarrow \text{CH}_2\text{ICH}_2\text{OH} + \text{HCHO}$                                 | 0.2-2D-12                                                                                                            | [9] [2]     |
| 356 | $\text{CH}_2\text{ICH}_2\text{O}_2 + \text{CH}_3\text{O}_2 \rightarrow \text{CH}_2\text{ICH}_2\text{OH} + \text{CH}_3\text{OH}$                        | 0.2-2D-12                                                                                                            | [9] [2]     |
| 357 | $\text{CH}_2\text{ICH}_2\text{O}_2 + \text{CH}_3\text{O}_2 \rightarrow \text{CH}_2\text{ICH}_2\text{O} + \text{HCHO} + \text{HO}_2$                    | 0.6-2D-12                                                                                                            | [9] [2]     |
| 358 | $\text{CH}_2\text{ICH}_2\text{O}_2 + \text{CH}_2\text{ICH}_2\text{O}_2 \rightarrow \text{CH}_2\text{ICH}_2\text{OH} + \text{CH}_2\text{ICH}_2\text{O}$ | $0.43 \cdot 3.98\text{D} \cdot 12 \cdot \exp(1240 \cdot (1\text{D}_0/\text{T} - 1\text{D}_0/298\text{D}_0))$         | [9] [2]     |
| 359 | $\text{CH}_2\text{ICH}_2\text{O}_2 + \text{CH}_2\text{ICH}_2\text{O}_2 \rightarrow \text{CH}_2\text{ICH}_2\text{O} + \text{CH}_2\text{ICH}_2\text{O}$  | $0.57 \cdot 3.98\text{D} \cdot 12 \cdot \exp(1240 \cdot (1\text{D}_0/\text{T} - 1\text{D}_0/298\text{D}_0))$         | [9] [2]     |
| 360 | $\text{CH}_2\text{ICH}_2\text{O}_2 + \text{NO} \rightarrow \text{CH}_2\text{ICH}_2\text{O} + \text{NO}_2$                                              | 9.7D-12                                                                                                              | [9] [2]     |
| 361 | $\text{CH}_2\text{ICH}_2\text{OH} + \text{OH} \rightarrow \text{CH}_2\text{ICH}_2\text{O} + \text{HO}_2$                                               | 4.6D-12                                                                                                              | [9] [2]     |
| 362 | $\text{CH}_2\text{ICH}_2\text{O} \rightarrow \text{CH}_2\text{ICH}_2\text{O} + \text{HO}_2$                                                            | $9.48\text{D} \cdot 15 \cdot \exp(-550 \cdot (1\text{D}_0/\text{T} - 1\text{D}_0/298\text{D}_0)) \cdot [\text{O}_2]$ | [9] [2]     |
| 363 | $\text{CH}_2\text{ICH}_2\text{O} + \text{OH} \rightarrow \text{CH}_2\text{ICO}_3$                                                                      | 3.1D-12                                                                                                              | [9] [2]     |
| 364 | $\text{CH}_2\text{ICO}_3 + \text{HO}_2 \rightarrow \text{CH}_2\text{ICO}_3\text{H}$                                                                    | $0.71 \cdot 1.41\text{D} \cdot 11 \cdot \exp(1040 \cdot (1\text{D}_0/\text{T} - 1\text{D}_0/298\text{D}_0))$         | [9] [2]     |
| 365 | $\text{CH}_2\text{ICO}_3 + \text{HO}_2 \rightarrow \text{CH}_2\text{ICOOH}$                                                                            | $0.29 \cdot 1.41\text{D} \cdot 11 \cdot \exp(1040 \cdot (1\text{D}_0/\text{T} - 1\text{D}_0/298\text{D}_0))$         | [9] [2]     |
| 366 | $\text{CH}_2\text{ICO}_3 + \text{CH}_3\text{O}_2 \rightarrow \text{CH}_2\text{ICOOH} + \text{HCHO}$                                                    | 0.3-1D-11                                                                                                            | [9] [2]     |
| 367 | $\text{CH}_2\text{ICO}_3 + \text{CH}_3\text{O}_2 \rightarrow \text{CH}_2\text{IO}_2 + \text{HCHO} + \text{HO}_2$                                       | 0.7-1D-11                                                                                                            | [9] [2]     |
| 368 | $\text{CH}_2\text{ICO}_3 + \text{NO} \rightarrow \text{CH}_2\text{IO}_2 + \text{NO}_2$                                                                 | $2\text{D} \cdot 11 \cdot \exp(270 \cdot (1\text{D}_0/\text{T} - 1\text{D}_0/298\text{D}_0))$                        | [9] [2]     |
| 369 | $\text{CH}_2\text{ICO}_3 + \text{NO}_2 \rightarrow \text{CH}_2\text{ICOOONO}_2$                                                                        | KMT62                                                                                                                | [9] [2]     |
| 370 | $\text{CH}_2\text{ICOOONO}_2 \rightarrow \text{CH}_2\text{ICO}_3 + \text{NO}_2$                                                                        | KMT63                                                                                                                | [9] [2]     |
| 371 | $\text{CH}_2\text{ICOOONO}_2 + \text{OH} \rightarrow \text{O}_2\text{CHICOOONO}_2$                                                                     | 6.26D-13                                                                                                             | [9] [2]     |
| 372 | $\text{O}_2\text{CHICOOONO}_2 + \text{NO} \rightarrow \text{CHOI} + \text{CO} + \text{NO}_2 + \text{NO}_2$                                             | $1.36\text{D} \cdot 11 \cdot \exp(360 \cdot (1\text{D}_0/\text{T} - 1\text{D}_0/298\text{D}_0))$                     | [9] [2]     |
| 373 | $\text{CH}_2\text{ICO}_3\text{H} + \text{OH} \rightarrow \text{CH}_2\text{ICO}_3$                                                                      | 4.29D-12                                                                                                             | [9] [2]     |
| 374 | $\text{CH}_2\text{ICOOH} + \text{OH} \rightarrow \text{CH}_2\text{IO}_2$                                                                               | $3.59\text{D} \cdot 12 \cdot \exp(190 \cdot (1\text{D}_0/\text{T} - 1\text{D}_0/298\text{D}_0))$                     | [9] [2]     |
| 375 | $\text{CH}_3\text{CHIO}_2 + \text{CH}_3\text{O}_2 \rightarrow \text{CH}_3\text{CHO} + \text{IODINE} + \text{HCHO} + \text{HO}_2$                       | 0.6-8.8D-13                                                                                                          | [9] [2]     |
| 376 | $\text{CH}_3\text{CHIO}_2 + \text{CH}_3\text{O}_2 \rightarrow \text{CH}_3\text{CHIOH} + \text{HCHO}$                                                   | 0.2-8.8D-13                                                                                                          | [9] [2]     |
| 377 | $\text{CH}_3\text{CHIO}_2 + \text{CH}_3\text{O}_2 \rightarrow \text{CH}_3\text{ClO} + \text{CH}_3\text{OH}$                                            | 0.2-8.8D-13                                                                                                          | [9] [2]     |
| 378 | $\text{CH}_3\text{CHIO}_2 + \text{NO} \rightarrow \text{CH}_3\text{CHO} + \text{IODINE} + \text{NO}_2$                                                 | $1.87\text{D} \cdot 11 \cdot \exp(360 \cdot (1\text{D}_0/\text{T} - 1\text{D}_0/298\text{D}_0))$                     | [9] [2]     |
| 379 | $\text{CH}_3\text{CHIOH} + \text{OH} \rightarrow \text{CH}_3\text{ClO} + \text{HO}_2$                                                                  | 2.77D-12                                                                                                             | [9] [2]     |
| 380 | $\text{CH}_3\text{ClO} + \text{OH} \rightarrow \text{ClOCH}_2\text{O}_2$                                                                               | 3.88D-14                                                                                                             | [9] [2]     |

[1] MCMv3.3.1 ; [2] Hoffmann et al. (2016) ; [3] Wu et al. (2014) ; [4] Berndt et al. (2019) ; [5] Kukui et al. (2003)  
 [6] Atkinson et al. (2007) ; [7] Sander et al. (2006) ; [8] Atkinson et al. (2008) ; [9] Braeuer et al. (2013) ; [10] Jacobson (2005)  
 [11] Demore et al. (1997) ; [12] Berndt et al. (2020) ; [13] Kahan et al. (2012) ; [14] Burkholder et al. (2015)  
 [E] Estimate based on equilibrium coefficients ; [C] Based on pKa value from COSMOtherm ; [A] Assumed

| #   | Reaction                                                                                                                | Rate                                                                                                      | Ref.        |
|-----|-------------------------------------------------------------------------------------------------------------------------|-----------------------------------------------------------------------------------------------------------|-------------|
| 381 | $\text{ClOCH}_2\text{O}_2 + \text{CH}_3\text{O}_2 \rightarrow \text{IODINE} + \text{CO} + \text{HCHO} + \text{HCHO} +$  | 2D-12                                                                                                     | [9] [2]     |
| 382 | $\text{ClOCH}_2\text{O}_2 + \text{NO} \rightarrow \text{IODINE} + \text{CO} + \text{HCHO} + \text{NO}_2$                | $1.36\text{D}-11 \cdot \exp(360 \cdot (1\text{D}0/\text{T}-1\text{D}0/298\text{D}0))$                     | [9] [2]     |
| 383 | $\text{CH}_2\text{I}_2 + \text{OH} \rightarrow \text{CHI}_2\text{O}_2$                                                  | $2.75\text{D}-14 \cdot \exp(-929 \cdot (1\text{D}0/\text{T}-1\text{D}0/298\text{D}0))$                    | [9] [2]     |
| 384 | $\text{CH}_2\text{I}_2 + \text{Cl} \rightarrow \text{CHI}_2\text{O}_2 + \text{HCl}$                                     | $4.7\text{D}-13 \cdot \exp(-1135 \cdot (1\text{D}0/\text{T}-1\text{D}0/298\text{D}0))$                    | [9] [2]     |
| 385 | $\text{CHI}_2\text{O}_2 + \text{HO}_2 \rightarrow \text{CHOI} + \text{HOI}$                                             | $0.3 \cdot 5.87\text{D}-12 \cdot \exp(700 \cdot (1\text{D}0/\text{T}-1\text{D}0/298\text{D}0))$           | [9] [2]     |
| 386 | $\text{CHI}_2\text{O}_2 + \text{HO}_2 \rightarrow \text{COI}_2$                                                         | $0.7 \cdot 5.87\text{D}-12 \cdot \exp(700 \cdot (1\text{D}0/\text{T}-1\text{D}0/298\text{D}0))$           | [9] [2]     |
| 387 | $\text{CHI}_2\text{O}_2 + \text{CH}_3\text{O}_2 \rightarrow \text{CHI}_2\text{OH} + \text{HCHO}$                        | 0.2-2D-12                                                                                                 | [9] [2]     |
| 388 | $\text{CHI}_2\text{O}_2 + \text{CH}_3\text{O}_2 \rightarrow \text{COI}_2 + \text{CH}_3\text{OH}$                        | 0.2-2D-12                                                                                                 | [9] [2]     |
| 389 | $\text{CHI}_2\text{O}_2 + \text{CH}_3\text{O}_2 \rightarrow \text{CHOI} + \text{IODINE} + \text{HO}_2 + \text{HCHO}$    | 0.6-2D-12                                                                                                 | [9] [2]     |
| 390 | $\text{CHI}_2\text{O}_2 + \text{CHI}_2\text{O}_2 \rightarrow \text{CHOI} + \text{CHOI} + \text{IODINE} + \text{IODINE}$ | 7D-12                                                                                                     | [9] [2]     |
| 391 | $\text{CHI}_2\text{O}_2 + \text{NO} \rightarrow \text{CHOI} + \text{IODINE} + \text{NO}_2$                              | 1.7D-11                                                                                                   | [9] [2]     |
| 392 | $\text{CHI}_2\text{OH} + \text{OH} \rightarrow \text{COI}_2 + \text{HO}_2$                                              | 9.34D-13                                                                                                  | [9] [2]     |
| 393 | $\text{COI}_2 + \text{OH} \rightarrow \text{COI} + \text{HOI}$                                                          | 5D-15                                                                                                     | [9] [2]     |
| 394 | $\text{CH}_3\text{I} + \text{OH} \rightarrow \text{CH}_2\text{IO}_2$                                                    | $4.3\text{D}-12 \cdot \exp(-1120/\text{T})$                                                               | [9] [2] [8] |
| 395 | $\text{CH}_3\text{I} + \text{Cl} \rightarrow \text{CH}_2\text{IO}_2 + \text{HCl}$                                       | $1.01\text{D}-12 \cdot \exp(-1000 \cdot (1\text{D}0/\text{T}-1\text{D}0/298\text{D}0))$                   | [9] [2] [7] |
| 396 | $\text{CH}_2\text{IO}_2 + \text{HO}_2 \rightarrow \text{CH}_2\text{IO}_2\text{H}$                                       | 0.85-6.7D-12                                                                                              | [9] [2] [8] |
| 397 | $\text{CH}_2\text{IO}_2 + \text{HO}_2 \rightarrow \text{CHOI}$                                                          | 0.15-6.7D-12                                                                                              | [9] [2] [8] |
| 398 | $\text{CH}_2\text{IO}_2 + \text{CH}_3\text{O}_2 \rightarrow \text{CH}_2\text{IOH} + \text{HCHO}$                        | 0.2-2D-12                                                                                                 | [9] [2]     |
| 399 | $\text{CH}_2\text{IO}_2 + \text{CH}_3\text{O}_2 \rightarrow \text{CHOI} + \text{CH}_3\text{OH}$                         | 0.2-2D-12                                                                                                 | [9] [2]     |
| 400 | $\text{CH}_2\text{IO}_2 + \text{CH}_3\text{O}_2 \rightarrow \text{CH}_2\text{IO} + \text{HO}_2 + \text{HCHO}$           | 0.6-2D-12                                                                                                 | [9] [2]     |
| 401 | $\text{CH}_2\text{IO}_2 + \text{CH}_2\text{IO}_2 \rightarrow \text{CH}_2\text{IO} + \text{CH}_2\text{IO}$               | 1.05D-12                                                                                                  | [9] [2]     |
| 402 | $\text{CH}_2\text{IO}_2 + \text{NO} \rightarrow \text{CH}_2\text{IO} + \text{NO}_2$                                     | 1.1D-11                                                                                                   | [9] [2]     |
| 403 | $\text{CH}_2\text{IO}_2\text{H} + \text{OH} \rightarrow \text{CH}_2\text{IO}_2$                                         | $3.59\text{D}-12 \cdot \exp(190 \cdot (1\text{D}0/\text{T}-1\text{D}0/298\text{D}0))$                     | [9] [2]     |
| 404 | $\text{CH}_2\text{IO}_2\text{H} + \text{OH} \rightarrow \text{CHOI} + \text{OH}$                                        | 5.79D-12                                                                                                  | [9] [2]     |
| 405 | $\text{CH}_2\text{IOH} + \text{OH} \rightarrow \text{CHOI} + \text{HO}_2$                                               | 1.06D-12                                                                                                  | [9] [2]     |
| 406 | $\text{CH}_2\text{IO} \rightarrow \text{CHOI} + \text{HO}_2$                                                            | $9.48\text{D}-15 \cdot \exp(-550 \cdot (1\text{D}0/\text{T}-1\text{D}0/298\text{D}0)) \cdot [\text{O}_2]$ | [9] [2]     |
| 407 | $\text{CHOI} + \text{OH} \rightarrow \text{IODINE} + \text{CO}$                                                         | 1.16D-12                                                                                                  | [9] [2]     |
| 408 | $\text{CHOI} + \text{Cl} \rightarrow \text{COI} + \text{HCl}$                                                           | $7.48\text{D}-12 \cdot \exp(-710 \cdot (1\text{D}0/\text{T}-1\text{D}0/298\text{D}0))$                    | [9] [2] [8] |
| 409 | $\text{COI} \rightarrow \text{CO} + \text{IODINE}$                                                                      | $4.1\text{D}-10 \cdot \exp(-2960/\text{T}) \cdot [\text{N}_2]$                                            | [9] [2] [8] |
| 410 | $\text{CO} + \text{IODINE} \rightarrow \text{COI}$                                                                      | $1.3\text{D}-33 \cdot (\text{T}/300)^{-3.8} \cdot [\text{N}_2]$                                           | [9] [2] [8] |
| 411 | $\text{IODINE}_2 \rightarrow \text{IODINE} + \text{IODINE}$                                                             | J(80)                                                                                                     | [9] [2] [6] |
| 412 | $\text{IO} \rightarrow \text{IODINE} + \text{O}$                                                                        | J(81)                                                                                                     | [9] [2] [6] |
| 413 | $\text{OIO} \rightarrow \text{IODINE}$                                                                                  | J(82)                                                                                                     | [9] [2]     |
| 414 | $\text{OIO} \rightarrow \text{IO} + \text{O}$                                                                           | J(83)                                                                                                     | [9] [2]     |
| 415 | $\text{I}_2\text{O}_2 \rightarrow \text{IODINE} + \text{IODINE}$                                                        | J(84)                                                                                                     | [9] [2]     |
| 416 | $\text{HI} \rightarrow \text{IODINE} + \text{HO}_2$                                                                     | J(85)                                                                                                     | [9] [2] [6] |
| 417 | $\text{HOI} \rightarrow \text{IODINE} + \text{OH}$                                                                      | J(86)                                                                                                     | [9] [2] [6] |

[1] MCMv3.3.1 ; [2] Hoffmann et al. (2016) ; [3] Wu et al. (2014) ; [4] Berndt et al. (2019) ; [5] Kukui et al. (2003)  
 [6] Atkinson et al. (2007) ; [7] Sander et al. (2006) ; [8] Atkinson et al. (2008) ; [9] Braeuer et al. (2013) ; [10] Jacobson (2005)  
 [11] Demore et al. (1997) ; [12] Berndt et al. (2020) ; [13] Kahan et al. (2012) ; [14] Burkholder et al. (2015)  
 [E] Estimate based on equilibrium coefficients ; [C] Based on pKa value from COSMOtherm ; [A] Assumed

| #   | Reaction                                                                                                       | Rate                                               | Ref.            |
|-----|----------------------------------------------------------------------------------------------------------------|----------------------------------------------------|-----------------|
| 418 | INO → IODINE + NO                                                                                              | J(87)                                              | [9] [2] [7]     |
| 419 | INO <sub>2</sub> → IODINE + NO <sub>2</sub>                                                                    | J(88)                                              | [9] [2] [7]     |
| 420 | INO <sub>3</sub> → IODINE + NO <sub>3</sub>                                                                    | J(89)                                              | [9] [2] [7]     |
| 421 | INO <sub>3</sub> → IO + NO <sub>2</sub>                                                                        | J(90)                                              | [9] [2] [7]     |
| 422 | ICl → IODINE + Cl                                                                                              | J(91)                                              | [9] [2] [6]     |
| 423 | IBr → IODINE + Br                                                                                              | J(92)                                              | [9] [2] [6]     |
| 424 | C3H7I → IODINE + IC3H7O <sub>2</sub>                                                                           | J(97)                                              | [9] [2]         |
| 425 | C2H5I → IODINE + C2H5O <sub>2</sub>                                                                            | J(98)                                              | [9] [2]         |
| 426 | CH <sub>2</sub> ICHO → CH <sub>2</sub> IO <sub>2</sub> + CO + HO <sub>2</sub>                                  | J(11)                                              | [9] [2] [9] [2] |
| 427 | CH <sub>2</sub> ICO <sub>3</sub> H → CH <sub>2</sub> IO <sub>2</sub> + OH                                      | J(41)                                              | [9] [2] [9] [2] |
| 428 | CH <sub>2</sub> I <sub>2</sub> → IODINE + CH <sub>2</sub> IO <sub>2</sub>                                      | J(99)                                              | [9] [2]         |
| 429 | CH <sub>3</sub> I → IODINE + CH <sub>3</sub> O <sub>2</sub>                                                    | J(96)                                              | [14]            |
| 430 | CH <sub>2</sub> IO <sub>2</sub> H → CH <sub>2</sub> IO + OH                                                    | J(41)                                              | [9] [2]         |
| 431 | CHOI → IODINE + CO + HO <sub>2</sub>                                                                           | J(11)                                              | [9] [2] [9] [2] |
| 432 | CH <sub>2</sub> ICl → IODINE + CH <sub>2</sub> ClO <sub>2</sub>                                                | J(100)                                             | [9] [2] [8]     |
| 433 | CH <sub>2</sub> IBr → IODINE + CH <sub>2</sub> BRO <sub>2</sub>                                                | J(101)                                             | [9] [2] [8]     |
| 434 | CHBr <sub>3</sub> + OH → CBr <sub>3</sub> O <sub>2</sub>                                                       | 1.8D-13-exp(-600·(1D0/T-1D0/298D0))                | [9] [2] [7]     |
| 435 | CHBr <sub>3</sub> + Cl → CBr <sub>3</sub> O <sub>2</sub> + HCl                                                 | 2.8D-13-exp(850·(1D0/T-1D0/298D0))                 | [9] [2] [7]     |
| 436 | CBr <sub>3</sub> O <sub>2</sub> + HO <sub>2</sub> → COBr <sub>2</sub> + HOBr                                   | 4.7D-13-exp(710/T)                                 | [9] [2] [8]     |
| 437 | CBr <sub>3</sub> O <sub>2</sub> + CH <sub>3</sub> O <sub>2</sub> → CBr <sub>3</sub> OH + HCHO                  | 0.3-6.6D-12                                        | [9] [2]         |
| 438 | CBr <sub>3</sub> O <sub>2</sub> + CH <sub>3</sub> O <sub>2</sub> → CBr <sub>3</sub> O + HCHO + HO <sub>2</sub> | 0.7-6.6D-12                                        | [9] [2]         |
| 439 | CBr <sub>3</sub> O <sub>2</sub> + CBr <sub>3</sub> O <sub>2</sub> → CBr <sub>3</sub> O + CBr <sub>3</sub> O;   | 3.3D-13-exp(740/T)                                 | [9] [2] [8]     |
| 440 | CBr <sub>3</sub> O <sub>2</sub> + NO → COBr <sub>2</sub> + Br + NO <sub>2</sub>                                | 1.81D-11-exp(270·(1D0/T-1D0/298D0))                | [9] [2] [7]     |
| 441 | CBr <sub>3</sub> O <sub>2</sub> + NO <sub>2</sub> → CBr <sub>3</sub> OONO <sub>2</sub>                         | KMT60                                              | [9] [2] [8]     |
| 442 | CBr <sub>3</sub> OONO <sub>2</sub> → CBr <sub>3</sub> O <sub>2</sub> + NO <sub>2</sub>                         | KMT61                                              | [9] [2] [8]     |
| 443 | CBr <sub>3</sub> OH + OH → CBr <sub>3</sub> O                                                                  | 3.6D-14                                            | [9] [2]         |
| 444 | CBr <sub>3</sub> O → COBr <sub>2</sub> + Br                                                                    | 4D13-exp(-4600/T)                                  | [9] [2] [8]     |
| 445 | DIBRET + Cl → DIBRETO <sub>2</sub> + HCl                                                                       | 4.3D-13-exp(-800·(1D0/T-1D0/298D0))                | [9] [2] [7]     |
| 446 | CH <sub>3</sub> BR + Cl → CH <sub>2</sub> BRO <sub>2</sub> + HCl                                               | 4.42D-13-exp(-1030·(1D0/T-1D0/298D0))              | [9] [2]         |
| 447 | COBr <sub>2</sub> + OH → COBr + HOBr                                                                           | 5D-15                                              | [9] [2] [8]     |
| 448 | COBr → CO + Br                                                                                                 | 4.1D-10-exp(-2960/T)·[N <sub>2</sub> ]             | [9] [2] [8]     |
| 449 | CO + Br → COBr                                                                                                 | 1.3D-33·(T/300) <sup>-3.8</sup> ·[N <sub>2</sub> ] | [9] [2] [8]     |
| 450 | CHBr <sub>3</sub> → Br + DIBRETO <sub>2</sub>                                                                  | J(93)                                              | [14]            |
| 451 | DIBRET → Br + CH <sub>2</sub> BrO <sub>2</sub>                                                                 | J(94)                                              | [14]            |
| 452 | COBr <sub>2</sub> → Br + Br + CO                                                                               | J(95)                                              | [14]            |
| 453 | CH <sub>2</sub> Br <sub>2</sub> + OH → CHBr <sub>2</sub> O <sub>2</sub>                                        | 1.5D-12-exp(-775/T)                                | [9] [2] [8]     |
| 454 | CHBr <sub>2</sub> O <sub>2</sub> + HO <sub>2</sub> → CHOBr + HOBr                                              | 0.3-5.87D-12-exp(700·(1D0/T-1D0/298D0))            | [9] [2] [8]     |

[1] MCMv3.3.1 ; [2] Hoffmann et al. (2016) ; [3] Wu et al. (2014) ; [4] Berndt et al. (2019) ; [5] Kukui et al. (2003)  
 [6] Atkinson et al. (2007) ; [7] Sander et al. (2006) ; [8] Atkinson et al. (2008) ; [9] Braeuer et al. (2013) ; [10] Jacobson (2005)  
 [11] Demore et al. (1997) ; [12] Berndt et al. (2020) ; [13] Kahan et al. (2012) ; [14] Burkholder et al. (2015)  
 [E] Estimate based on equilibrium coefficients ; [C] Based on pKa value from COSMOtherm ; [A] Assumed

| #   | Reaction                                                                                                            | Rate                                                                                                                  | Ref.        |
|-----|---------------------------------------------------------------------------------------------------------------------|-----------------------------------------------------------------------------------------------------------------------|-------------|
| 455 | $\text{CHBr}_2\text{O}_2 + \text{HO}_2 \rightarrow \text{COBr}_2 + \text{HOBr}$                                     | $0.7 \cdot 5.87\text{D}-12 \cdot \exp(700 \cdot (1\text{D}0/\text{T}-1\text{D}0/298\text{D}0))$                       | [9] [2] [8] |
| 456 | $\text{CHBr}_2\text{O}_2 + \text{CH}_3\text{O}_2 \rightarrow \text{CHBr}_2\text{OH} + \text{HCHO}$                  | 0.2·2D-12                                                                                                             | [9] [2]     |
| 457 | $\text{CHBr}_2\text{O}_2 + \text{CH}_3\text{O}_2 \rightarrow \text{COBr}_2 + \text{CH}_3\text{OH}$                  | 0.2·2D-12                                                                                                             | [9] [2]     |
| 458 | $\text{CHBr}_2\text{O}_2 + \text{CH}_3\text{O}_2 \rightarrow \text{CHOBr} + \text{Br} + \text{HCHO} + \text{HO}_2$  | 0.6·2D-12                                                                                                             | [9] [2]     |
| 459 | $\text{CHBr}_2\text{O}_2 + \text{CHBr}_2\text{O}_2 \rightarrow \text{CHOBr} + \text{CHOBr} + \text{Br} + \text{Br}$ | 7.0D-12                                                                                                               | [9] [2] [8] |
| 460 | $\text{CHBr}_2\text{O}_2 + \text{NO} \rightarrow \text{CHOBr} + \text{Br} + \text{NO}_2$                            | 1.7D-11                                                                                                               | [9] [2] [8] |
| 461 | $\text{CHBr}_2\text{OH} + \text{OH} \rightarrow \text{COBr}_2 + \text{HO}_2$                                        | 9.34D-13                                                                                                              | [9] [2]     |
| 462 | $\text{CH}_3\text{SOH} + \text{O}_3 \rightarrow \text{CH}_3\text{O}_2 + \text{HO}_2 + \text{SO}_2$                  | 2D-12                                                                                                                 | [12]        |
| 463 | $\text{Cl}_2^- + \text{Cl}(\text{aq}) \rightarrow \text{Cl}_2(\text{aq}) + \text{Cl}^-$                             | 2.1D9/(cw·Na)                                                                                                         | [9] [2]     |
| 464 | $\text{Cl}_2^- + \text{Cl}_2^- \rightarrow \text{Cl}_2(\text{aq}) + \text{Cl}^- + \text{Cl}^-$                      | 1.8D9/(cw·Na)                                                                                                         | [9] [2]     |
| 465 | $\text{Cl}^- + \text{O}_3(\text{aq}) \rightarrow \text{ClO}^-$                                                      | 3D-3/(cw·Na)                                                                                                          | [9] [2]     |
| 466 | $\text{Cl}(\text{aq}) + \text{H}_2\text{O}_2(\text{aq}) \rightarrow \text{Cl}^- + \text{HO}_2(\text{aq})$           | 2D9/(cw·Na)                                                                                                           | [9] [2]     |
| 467 | $\text{Cl}_2^- + \text{H}_2\text{O}_2(\text{aq}) \rightarrow \text{Cl}^- + \text{Cl}^- + \text{HO}_2(\text{aq})$    | $5\text{D}4 \cdot \exp(-3340.0 \cdot (1\text{D}0/\text{T}-1\text{D}0/298\text{D}0)) / (\text{cw} \cdot \text{Na})$    | [9] [2]     |
| 468 | $\text{Cl}_2^- \rightarrow \text{Cl}^- + \text{ClOH}^-$                                                             | $23.4 \cdot \text{m}(\text{H}_2\text{O}) + [\text{OH}^-] \cdot 4.5\text{D}7$                                          | [9] [2]     |
| 469 | $\text{Cl}_2^- + \text{HO}_2(\text{aq}) \rightarrow \text{Cl}^- + \text{Cl}^-$                                      | 1.3D10/(cw·Na)                                                                                                        | [9] [2]     |
| 470 | $\text{Cl}_2^- + \text{O}_2^- \rightarrow \text{Cl}^- + \text{Cl}^-$                                                | 6D9/(cw·Na)                                                                                                           | [9] [2]     |
| 471 | $\text{Cl}_2^- + \text{OH}(\text{aq}) \rightarrow \text{HOCl}(\text{aq}) + \text{Cl}^-$                             | 1D9/(cw·Na)                                                                                                           | [9] [2]     |
| 472 | $\text{Cl}_2^- \rightarrow \text{Cl}^- + \text{Cl}^- + \text{OH}(\text{aq})$                                        | $[\text{OH}^-] \cdot 4\text{D}6$                                                                                      | [9] [2]     |
| 473 | $\text{Cl}_3^- + \text{HO}_2(\text{aq}) \rightarrow \text{Cl}_2^- + \text{Cl}^-$                                    | 1D9/(cw·Na)                                                                                                           | [9] [2]     |
| 474 | $\text{Cl}_3^- + \text{O}_2^- \rightarrow \text{Cl}_2^- + \text{Cl}^-$                                              | 3.8D9/(cw·Na)                                                                                                         | [9] [2]     |
| 475 | $\text{Cl}_2(\text{aq}) + \text{HO}_2(\text{aq}) \rightarrow \text{Cl}_2^-$                                         | 1D9/(cw·Na)                                                                                                           | [9] [2]     |
| 476 | $\text{Cl}_2(\text{aq}) + \text{O}_2^- \rightarrow \text{Cl}_2^-$                                                   | 1D9/(cw·Na)                                                                                                           | [9] [2]     |
| 477 | $\text{HOCl}(\text{aq}) + \text{H}_2\text{O}_2(\text{aq}) \rightarrow \text{Cl}^-$                                  | 1.1D4/(cw·Na)                                                                                                         | [9] [2]     |
| 478 | $\text{ClO}^- + \text{H}_2\text{O}_2(\text{aq}) \rightarrow \text{Cl}^-$                                            | 1.7D5/(cw·Na)                                                                                                         | [9] [2]     |
| 479 | $\text{HOCl}(\text{aq}) + \text{HO}_2(\text{aq}) \rightarrow \text{Cl}(\text{aq})$                                  | 7.5D6/(cw·Na)                                                                                                         | [9] [2]     |
| 480 | $\text{HOCl}(\text{aq}) + \text{O}_2^- \rightarrow \text{Cl}(\text{aq})$                                            | 7.5D6/(cw·Na)                                                                                                         | [9] [2]     |
| 481 | $\text{ClO}^- + \text{O}_2^- \rightarrow \text{Cl}(\text{aq})$                                                      | 2D8/(cw·Na)                                                                                                           | [9] [2]     |
| 482 | $\text{HOCl}(\text{aq}) + \text{OH}(\text{aq}) \rightarrow \text{ClO}(\text{aq})$                                   | 2D9/(cw·Na)                                                                                                           | [9] [2]     |
| 483 | $\text{ClO}^- + \text{OH}(\text{aq}) \rightarrow \text{ClO}(\text{aq})$                                             | 8.8D9/(cw·Na)                                                                                                         | [9] [2]     |
| 484 | $\text{Cl}_2^- + \text{HSO}_3^- \rightarrow \text{Cl}^- + \text{Cl}^- + \text{SO}_3^-$                              | $1.7\text{D}8 \cdot \exp(-400.0 \cdot (1\text{D}0/\text{T}-1\text{D}0/298\text{D}0)) / (\text{cw} \cdot \text{Na})$   | [9] [2]     |
| 485 | $\text{Cl}_2^- + \text{SO}_3^{2-} \rightarrow \text{Cl}^- + \text{Cl}^- + \text{SO}_3^-$                            | 6.2D7/(cw·Na)                                                                                                         | [9] [2]     |
| 486 | $\text{HOCl}(\text{aq}) + \text{SO}_3^{2-} \rightarrow \text{Cl}^- + \text{HSO}_4^-$                                | 7.6D8/(cw·Na)                                                                                                         | [9] [2]     |
| 487 | $\text{HOCl}(\text{aq}) + \text{HSO}_3^- \rightarrow \text{Cl}^- + \text{HSO}_4^-$                                  | 7.6D8/(cw·Na)                                                                                                         | [9] [2]     |
| 488 | $\text{Cl}^- + \text{HSO}_5^- \rightarrow \text{HOCl}(\text{aq}) + \text{SO}_4^{2-}$                                | $1.8\text{D}-3 \cdot \exp(-7352.0 \cdot (1\text{D}0/\text{T}-1\text{D}0/298\text{D}0)) / (\text{cw} \cdot \text{Na})$ | [9] [2]     |
| 489 | $\text{Cl}_2^- + \text{NO}_2^- \rightarrow \text{Cl}^- + \text{Cl}^- + \text{NO}_2(\text{aq})$                      | 6D7/(cw·Na)                                                                                                           | [9] [2]     |
| 490 | $\text{Cl}(\text{aq}) + \text{Cl}^- \rightarrow \text{Cl}_2^-$                                                      | 8.5D9/(cw·Na)                                                                                                         | [9] [2]     |
| 491 | $\text{Cl}_2^- \rightarrow \text{Cl}(\text{aq}) + \text{Cl}^-$                                                      | 6D4                                                                                                                   | [9] [2]     |

[1] MCMv3.3.1 ; [2] Hoffmann et al. (2016) ; [3] Wu et al. (2014) ; [4] Berndt et al. (2019) ; [5] Kukui et al. (2003)  
 [6] Atkinson et al. (2007) ; [7] Sander et al. (2006) ; [8] Atkinson et al. (2008) ; [9] Braeuer et al. (2013) ; [10] Jacobson (2005)  
 [11] Demore et al. (1997) ; [12] Berndt et al. (2020) ; [13] Kahan et al. (2012) ; [14] Burkholder et al. (2015)  
 [E] Estimate based on equilibrium coefficients ; [C] Based on pKa value from COSMOtherm ; [A] Assumed

| #   | Reaction                                                                                                         | Rate                                                                                                                                      | Ref.    |
|-----|------------------------------------------------------------------------------------------------------------------|-------------------------------------------------------------------------------------------------------------------------------------------|---------|
| 492 | $\text{Cl}_2(\text{aq}) + \text{Cl}^- \rightarrow \text{Cl}_3^-$                                                 | 2D4/(cw·Na)                                                                                                                               | [9] [2] |
| 493 | $\text{Cl}_3^- \rightarrow \text{Cl}_2(\text{aq}) + \text{Cl}^-$                                                 | 1.1D5                                                                                                                                     | [9] [2] |
| 494 | $\text{Cl}_2(\text{aq}) \rightarrow \text{Cl}^- + \text{HOCl}(\text{aq})$                                        | $m(\text{H}_2\text{O}) \cdot 0.4 \cdot \exp(-8000.0 \cdot (1\text{D}0/\text{T} - 1\text{D}0/298\text{D}0))$                               | [9] [2] |
| 495 | $\text{Cl}^- + \text{HOCl}(\text{aq}) \rightarrow \text{Cl}_2(\text{aq})$                                        | $[\text{H}^+] \cdot 2.1\text{D}4 \cdot \exp(-3500.0 \cdot (1\text{D}0/\text{T} - 1\text{D}0/298\text{D}0)) / (\text{cw} \cdot \text{Na})$ | [9] [2] |
| 496 | $\text{HCl}(\text{aq}) \rightarrow \text{Cl}^-$                                                                  | $5\text{D}11 \cdot \exp(6890.0 \cdot (1\text{D}0/\text{T} - 1\text{D}0/298\text{D}0))$                                                    | [9] [2] |
| 497 | $\text{Cl}^- \rightarrow \text{HCl}(\text{aq})$                                                                  | $[\text{H}^+] \cdot 2.9\text{D}5$                                                                                                         | [9] [2] |
| 498 | $\text{HOCl}(\text{aq}) \rightarrow \text{ClO}^-$                                                                | 1.5D3                                                                                                                                     | [9] [2] |
| 499 | $\text{ClO}^- \rightarrow \text{HOCl}(\text{aq})$                                                                | $[\text{H}^+] \cdot 5\text{D}10$                                                                                                          | [9] [2] |
| 500 | $\text{Cl}^- + \text{OH}(\text{aq}) \rightarrow \text{ClOH}^-$                                                   | 4.3D9/(cw·Na)                                                                                                                             | [9] [2] |
| 501 | $\text{ClOH}^- \rightarrow \text{Cl}^- + \text{OH}(\text{aq})$                                                   | 6.1D9                                                                                                                                     | [9] [2] |
| 502 | $\text{Cl}(\text{aq}) \rightarrow \text{ClOH}^-$                                                                 | $[\text{OH}^-] \cdot 1.8\text{D}10 + m(\text{H}_2\text{O}) \cdot 4.1\text{D}3$                                                            | [9] [2] |
| 503 | $\text{ClOH}^- \rightarrow \text{Cl}(\text{aq})$                                                                 | $23\text{D}0 + [\text{H}^+] \cdot 2.1\text{D}10$                                                                                          | [9] [2] |
| 504 | $\text{ClOH}^- + \text{Cl}^- \rightarrow \text{Cl}_2^-$                                                          | 1D4/(cw·Na)                                                                                                                               | [9] [2] |
| 505 | $\text{Cl}^- + \text{SO}_4^{2-} \rightarrow \text{Cl}(\text{aq}) + \text{SO}_4^{2-}$                             | 2.52D8/(cw·Na)                                                                                                                            | [9] [2] |
| 506 | $\text{Cl}(\text{aq}) + \text{SO}_4^{2-} \rightarrow \text{Cl}^- + \text{SO}_4^{2-}$                             | 2.1D8/(cw·Na)                                                                                                                             | [9] [2] |
| 507 | $\text{Cl}^- + \text{NO}_3(\text{aq}) \rightarrow \text{Cl}(\text{aq}) + \text{NO}_3^-$                          | $3.4\text{D}8 \cdot \exp(-4300.0 \cdot (1\text{D}0/\text{T} - 1\text{D}0/298\text{D}0)) / (\text{cw} \cdot \text{Na})$                    | [9] [2] |
| 508 | $\text{Cl}(\text{aq}) + \text{NO}_3^- \rightarrow \text{Cl}^- + \text{NO}_3(\text{aq})$                          | 1D8/(cw·Na)                                                                                                                               | [9] [2] |
| 509 | $\text{Br}(\text{aq}) + \text{Br}(\text{aq}) \rightarrow \text{Br}_2(\text{aq})$                                 | 1D9/(cw·Na)                                                                                                                               | [9] [2] |
| 510 | $\text{Br}_2^- + \text{Br}_2^- \rightarrow \text{Br}_2(\text{aq}) + \text{Br}^- + \text{Br}^-$                   | 1.7D9/(cw·Na)                                                                                                                             | [9] [2] |
| 511 | $\text{Br}^- + \text{O}_3(\text{aq}) \rightarrow \text{BrO}^-$                                                   | $210.0 \cdot \exp(-4450.0 \cdot (1\text{D}0/\text{T} - 1\text{D}0/298\text{D}0)) / (\text{cw} \cdot \text{Na})$                           | [9] [2] |
| 512 | $\text{Br}(\text{aq}) + \text{HO}_2(\text{aq}) \rightarrow \text{Br}^-$                                          | 1.6D8/(cw·Na)                                                                                                                             | [9] [2] |
| 513 | $\text{Br}(\text{aq}) + \text{H}_2\text{O}_2(\text{aq}) \rightarrow \text{Br}^- + \text{HO}_2(\text{aq})$        | 4D9/(cw·Na)                                                                                                                               | [9] [2] |
| 514 | $\text{Br}_2(\text{aq}) + \text{HO}_2(\text{aq}) \rightarrow \text{Br}_2^-$                                      | 1.1D8/(cw·Na)                                                                                                                             | [9] [2] |
| 515 | $\text{Br}_2(\text{aq}) + \text{O}_2^- \rightarrow \text{Br}_2^-$                                                | 5.6D9/(cw·Na)                                                                                                                             | [9] [2] |
| 516 | $\text{Br}_2(\text{aq}) + \text{H}_2\text{O}_2(\text{aq}) \rightarrow \text{Br}^- + \text{Br}^-$                 | 1.3D3/(cw·Na)                                                                                                                             | [9] [2] |
| 517 | $\text{Br}_2^- + \text{OH}(\text{aq}) \rightarrow \text{Br}^- + \text{HOBr}(\text{aq})$                          | 1D9/(cw·Na)                                                                                                                               | [9] [2] |
| 518 | $\text{Br}_2^- \rightarrow \text{Br}^- + \text{Br}^- + \text{OH}(\text{aq})$                                     | $[\text{OH}^-] \cdot 1.1\text{D}4$                                                                                                        | [9] [2] |
| 519 | $\text{Br}_2^- + \text{HO}_2(\text{aq}) \rightarrow \text{Br}^- + \text{Br}^-$                                   | 4.4D9/(cw·Na)                                                                                                                             | [9] [2] |
| 520 | $\text{Br}_2^- + \text{HO}_2(\text{aq}) \rightarrow \text{Br}_2(\text{aq}) + \text{H}_2\text{O}_2(\text{aq})$    | 4.4D9/(cw·Na)                                                                                                                             | [9] [2] |
| 521 | $\text{Br}_2^- + \text{O}_2^- \rightarrow \text{Br}^- + \text{Br}^-$                                             | 1.7D8/(cw·Na)                                                                                                                             | [9] [2] |
| 522 | $\text{Br}_2^- + \text{H}_2\text{O}_2(\text{aq}) \rightarrow \text{Br}^- + \text{Br}^- + \text{HO}_2(\text{aq})$ | 1D5/(cw·Na)                                                                                                                               | [9] [2] |
| 523 | $\text{Br}_3^- + \text{HO}_2(\text{aq}) \rightarrow \text{Br}_2^- + \text{Br}^-$                                 | 1D7/(cw·Na)                                                                                                                               | [9] [2] |
| 524 | $\text{Br}_3^- + \text{O}_2^- \rightarrow \text{Br}_2^- + \text{Br}^-$                                           | 3.8D9/(cw·Na)                                                                                                                             | [9] [2] |
| 525 | $\text{BrO}(\text{aq}) + \text{BrO}(\text{aq}) \rightarrow \text{BrO}_2^- + \text{BrO}^-$                        | 2.8D9/(cw·Na)                                                                                                                             | [9] [2] |
| 526 | $\text{BrO}_2^- + \text{BrO}(\text{aq}) \rightarrow \text{BrO}_2(\text{aq}) + \text{BrO}^-$                      | 4D8/(cw·Na)                                                                                                                               | [9] [2] |
| 527 | $\text{Br}_2^- + \text{BrO}_2^- \rightarrow \text{Br}^- + \text{Br}^- + \text{BrO}_2(\text{aq})$                 | 8D7/(cw·Na)                                                                                                                               | [9] [2] |
| 528 | $\text{BrO}_2^- + \text{OH}(\text{aq}) \rightarrow \text{BrO}_2(\text{aq})$                                      | 1.8D9/(cw·Na)                                                                                                                             | [9] [2] |

[1] MCMv3.3.1 ; [2] Hoffmann et al. (2016) ; [3] Wu et al. (2014) ; [4] Berndt et al. (2019) ; [5] Kukui et al. (2003)  
 [6] Atkinson et al. (2007) ; [7] Sander et al. (2006) ; [8] Atkinson et al. (2008) ; [9] Braeuer et al. (2013) ; [10] Jacobson (2005)  
 [11] Demore et al. (1997) ; [12] Berndt et al. (2020) ; [13] Kahan et al. (2012) ; [14] Burkholder et al. (2015)  
 [E] Estimate based on equilibrium coefficients ; [C] Based on pKa value from COSMOtherm ; [A] Assumed

| #   | Reaction                                                                                       | Rate                                                                            | Ref.    |
|-----|------------------------------------------------------------------------------------------------|---------------------------------------------------------------------------------|---------|
| 529 | $\text{HOBr(aq)} + \text{OH(aq)} \rightarrow \text{BrO(aq)}$                                   | 2D9/(cw·Na)                                                                     | [9] [2] |
| 530 | $\text{BrO}^- + \text{OH(aq)} \rightarrow \text{BrO(aq)}$                                      | 4.5D9/(cw·Na)                                                                   | [9] [2] |
| 531 | $\text{HOBr(aq)} + \text{HO}_2\text{(aq)} \rightarrow \text{Br(aq)}$                           | 1D9/(cw·Na)                                                                     | [9] [2] |
| 532 | $\text{HOBr(aq)} + \text{O}_2^- \rightarrow \text{Br(aq)}$                                     | 3.5D9/(cw·Na)                                                                   | [9] [2] |
| 533 | $\text{BrO}^- + \text{O}_2^- \rightarrow \text{Br(aq)}$                                        | 2D8/(cw·Na)                                                                     | [9] [2] |
| 534 | $\text{HOBr(aq)} + \text{H}_2\text{O}_2\text{(aq)} \rightarrow \text{Br}^-$                    | 3.5D6/(cw·Na)                                                                   | [9] [2] |
| 535 | $\text{BrO}^- + \text{H}_2\text{O}_2\text{(aq)} \rightarrow \text{Br}^-$                       | 2D5/(cw·Na)                                                                     | [9] [2] |
| 536 | $\text{Br}_2^- + \text{HSO}_3^- \rightarrow \text{Br}^- + \text{Br}^- + \text{SO}_3^-$         | $5D7 \cdot \exp(-780.0 \cdot (1D0/T - 1D0/298D0)) / (cw \cdot Na)$              | [9] [2] |
| 537 | $\text{Br}_2^- + \text{SO}_3^{2-} \rightarrow \text{Br}^- + \text{Br}^- + \text{SO}_3^-$       | $3.3D7 \cdot \exp(-650.0 \cdot (1D0/T - 1D0/298D0)) / (cw \cdot Na)$            | [9] [2] |
| 538 | $\text{Br}^- + \text{SO}_4^- \rightarrow \text{Br(aq)} + \text{SO}_4^{2-}$                     | 2.1D9/(cw·Na)                                                                   | [9] [2] |
| 539 | $\text{HOBr(aq)} + \text{SO}_3^{2-} \rightarrow \text{Br}^- + \text{HSO}_4^-$                  | 5D9/(cw·Na)                                                                     | [9] [2] |
| 540 | $\text{HOBr(aq)} + \text{HSO}_3^- \rightarrow \text{Br}^- + \text{HSO}_4^-$                    | 5D9/(cw·Na)                                                                     | [9] [2] |
| 541 | $\text{Br}^- + \text{HSO}_5^- \rightarrow \text{HOBr(aq)} + \text{SO}_4^{2-}$                  | $1D0 \cdot \exp(-5338.0 \cdot (1D0/T - 1D0/298D0)) / (cw \cdot Na)$             | [9] [2] |
| 542 | $\text{Br}^- + \text{NO}_3\text{(aq)} \rightarrow \text{Br(aq)} + \text{NO}_3^-$               | 3.8D9/(cw·Na)                                                                   | [9] [2] |
| 543 | $\text{Br}_2^- + \text{NO}_2^- \rightarrow \text{Br}^- + \text{Br}^- + \text{NO}_2\text{(aq)}$ | $1.2D7 \cdot \exp(-1720.0 \cdot (1D0/T - 1D0/298D0)) / (cw \cdot Na)$           | [9] [2] |
| 544 | $\text{Br}^- + \text{NO}_2\text{kat}^- \rightarrow \text{BrNO}_2\text{(aq)}$                   | 1D10/(cw·Na)                                                                    | [9] [2] |
| 545 | $\text{Br}^- + \text{BrNO}_2\text{(aq)} \rightarrow \text{Br}_2\text{(aq)} + \text{NO}_2^-$    | 2.55D4/(cw·Na)                                                                  | [9] [2] |
| 546 | $\text{Br}_2^- + \text{Cl}_2^- \rightarrow \text{Br}_2\text{(aq)} + \text{Cl}^- + \text{Cl}^-$ | 4D9/(cw·Na)                                                                     | [9] [2] |
| 547 | $\text{Br}^- + \text{HOCl(aq)} \rightarrow \text{BrCl(aq)}$                                    | 1.3D6/(cw·Na)                                                                   | [9] [2] |
| 548 | $\text{Br}^- + \text{ClO}^- \rightarrow \text{BrCl(aq)}$                                       | 3.65D10/(cw·Na)                                                                 | [9] [2] |
| 549 | $\text{Br}^- + \text{ClNO}_2\text{(aq)} \rightarrow \text{BrCl(aq)} + \text{NO}_2^-$           | 5D6/(cw·Na)                                                                     | [9] [2] |
| 550 | $\text{BrNO}_2\text{(aq)} + \text{Cl}^- \rightarrow \text{BrCl(aq)} + \text{NO}_2^-$           | 1D1/(cw·Na)                                                                     | [9] [2] |
| 551 | $\text{Br(aq)} + \text{Br}^- \rightarrow \text{Br}_2^-$                                        | 1.2D10/(cw·Na)                                                                  | [9] [2] |
| 552 | $\text{Br}_2^- \rightarrow \text{Br(aq)} + \text{Br}^-$                                        | 1.9D4                                                                           | [9] [2] |
| 553 | $\text{Br}_2\text{(aq)} + \text{Br}^- \rightarrow \text{Br}_3^-$                               | 9.6D8/(cw·Na)                                                                   | [9] [2] |
| 554 | $\text{Br}_3^- \rightarrow \text{Br}_2\text{(aq)} + \text{Br}^-$                               | 5.5D7                                                                           | [9] [2] |
| 555 | $\text{Br}_2\text{(aq)} \rightarrow \text{Br}^- + \text{HOBr(aq)}$                             | $m(\text{H}_2\text{O}) \cdot 1.7 \cdot \exp(-7500.0 \cdot (1D0/T - 1D0/298D0))$ | [9] [2] |
| 556 | $\text{Br}^- + \text{HOBr(aq)} \rightarrow \text{Br}_2\text{(aq)}$                             | $[\text{H}^+] \cdot 1.6D10 / (cw \cdot Na)$                                     | [9] [2] |
| 557 | $\text{HBr(aq)} \rightarrow \text{Br}^-$                                                       | 5D11                                                                            | [9] [2] |
| 558 | $\text{Br}^- \rightarrow \text{HBr(aq)}$                                                       | $[\text{H}^+] \cdot 5D2$                                                        | [9] [2] |
| 559 | $\text{HOBr(aq)} \rightarrow \text{BrO}^-$                                                     | 1D2                                                                             | [9] [2] |
| 560 | $\text{BrO}^- \rightarrow \text{HOBr(aq)}$                                                     | $[\text{H}^+] \cdot 5D10$                                                       | [9] [2] |
| 561 | $\text{Br}^- + \text{OH(aq)} \rightarrow \text{BrOH}^-$                                        | 1.1D10/(cw·Na)                                                                  | [9] [2] |
| 562 | $\text{BrOH}^- \rightarrow \text{Br}^- + \text{OH(aq)}$                                        | 3.3D7                                                                           | [9] [2] |
| 563 | $\text{Br(aq)} \rightarrow \text{BrOH}^-$                                                      | $[\text{OH}^-] \cdot 1.3D10 + m(\text{H}_2\text{O}) \cdot 2.45D-2$              | [9] [2] |
| 564 | $\text{BrOH}^- \rightarrow \text{Br(aq)}$                                                      | $4.2D6 + [\text{H}^+] \cdot 4.4D10$                                             | [9] [2] |
| 565 | $\text{BrOH}^- + \text{Br}^- \rightarrow \text{Br}_2^-$                                        | 1.9D8/(cw·Na)                                                                   | [9] [2] |

[1] MCMv3.3.1 ; [2] Hoffmann et al. (2016) ; [3] Wu et al. (2014) ; [4] Berndt et al. (2019) ; [5] Kukui et al. (2003)  
 [6] Atkinson et al. (2007) ; [7] Sander et al. (2006) ; [8] Atkinson et al. (2008) ; [9] Braeuer et al. (2013) ; [10] Jacobson (2005)  
 [11] Demore et al. (1997) ; [12] Berndt et al. (2020) ; [13] Kahan et al. (2012) ; [14] Burkholder et al. (2015)  
 [E] Estimate based on equilibrium coefficients ; [C] Based on pKa value from COSMOtherm ; [A] Assumed



| #   | Reaction                                                                                                  | Rate                                                                         | Ref.    |
|-----|-----------------------------------------------------------------------------------------------------------|------------------------------------------------------------------------------|---------|
| 566 | $\text{Br}_2^- \rightarrow \text{BrOH}^- + \text{Br}^-$                                                   | $[\text{OH}^-] \cdot 2.7\text{D}6$                                           | [9] [2] |
| 567 | $\text{HOBr}(\text{aq}) + \text{HOBr}(\text{aq}) \rightarrow \text{Br}^- + \text{HBrO}_2(\text{aq})$      | $2\text{D}-5/(\text{cw} \cdot \text{Na})$                                    | [9] [2] |
| 568 | $\text{Br}^- + \text{HBrO}_2(\text{aq}) \rightarrow \text{HOBr}(\text{aq}) + \text{HOBr}(\text{aq})$      | $[\text{H}^+] \cdot 3\text{D}6/((\text{cw} \cdot \text{Na}))$                | [9] [2] |
| 569 | $\text{HBrO}_2(\text{aq}) \rightarrow \text{BrO}_2^-$                                                     | $6.3\text{D}5$                                                               | [9] [2] |
| 570 | $\text{BrO}_2^- \rightarrow \text{HBrO}_2(\text{aq})$                                                     | $[\text{H}^+] \cdot 5\text{D}10$                                             | [9] [2] |
| 571 | $\text{HOBr}(\text{aq}) + \text{HBrO}_2(\text{aq}) \rightarrow \text{Br}^- + \text{BrO}_3^-$              | $3.2\text{D}0/(\text{cw} \cdot \text{Na})$                                   | [9] [2] |
| 572 | $\text{Br}^- + \text{BrO}_3^- \rightarrow \text{HOBr}(\text{aq}) + \text{HBrO}_2(\text{aq})$              | $([\text{H}^+]^2\text{D}0) \cdot 2.0\text{D}0/((\text{cw} \cdot \text{Na}))$ | [9] [2] |
| 573 | $\text{HBrO}_2(\text{aq}) + \text{HBrO}_2(\text{aq}) \rightarrow \text{HOBr}(\text{aq}) + \text{BrO}_3^-$ | $3\text{D}3/(\text{cw} \cdot \text{Na})$                                     | [9] [2] |
| 574 | $\text{HOBr}(\text{aq}) + \text{BrO}_3^- \rightarrow \text{HBrO}_2(\text{aq}) + \text{HBrO}_2(\text{aq})$ | $[\text{H}^+] \cdot 1\text{D}-8/((\text{cw} \cdot \text{Na}))$               | [9] [2] |
| 575 | $\text{Br}_2\text{O}_4(\text{aq}) \rightarrow \text{BrO}_3^- + \text{HBrO}_2(\text{aq})$                  | $m(\text{H}_2\text{O}) \cdot 2.2\text{D}3$                                   | [9] [2] |
| 576 | $\text{BrO}_3^- + \text{HBrO}_2(\text{aq}) \rightarrow \text{Br}_2\text{O}_4(\text{aq})$                  | $[\text{H}^+] \cdot 42.0\text{D}0/((\text{cw} \cdot \text{Na}))$             | [9] [2] |
| 577 | $\text{Br}_2\text{O}_4(\text{aq}) \rightarrow \text{BrO}_2(\text{aq}) + \text{BrO}_2(\text{aq})$          | $7.4\text{D}4$                                                               | [9] [2] |
| 578 | $\text{BrO}_2(\text{aq}) + \text{BrO}_2(\text{aq}) \rightarrow \text{Br}_2\text{O}_4(\text{aq})$          | $1.4\text{D}9/(\text{cw} \cdot \text{Na})$                                   | [9] [2] |
| 579 | $\text{BrCl}(\text{aq}) \rightarrow \text{HOBr}(\text{aq}) + \text{Cl}^-$                                 | $1\text{D}5$                                                                 | [9] [2] |
| 580 | $\text{HOBr}(\text{aq}) + \text{Cl}^- \rightarrow \text{BrCl}(\text{aq})$                                 | $[\text{H}^+] \cdot 5.6\text{D}9/((\text{cw} \cdot \text{Na}))$              | [9] [2] |
| 581 | $\text{BrCl}^- \rightarrow \text{Br}^- + \text{Cl}(\text{aq})$                                            | $1.9\text{D}3$                                                               | [9] [2] |
| 582 | $\text{Br}^- + \text{Cl}(\text{aq}) \rightarrow \text{BrCl}^-$                                            | $1.2\text{D}10/(\text{cw} \cdot \text{Na})$                                  | [9] [2] |
| 583 | $\text{BrCl}^- \rightarrow \text{Br}(\text{aq}) + \text{Cl}^-$                                            | $6.1\text{D}4$                                                               | [9] [2] |
| 584 | $\text{Br}(\text{aq}) + \text{Cl}^- \rightarrow \text{BrCl}^-$                                            | $1\text{D}8/(\text{cw} \cdot \text{Na})$                                     | [9] [2] |
| 585 | $\text{BrCl}^- + \text{Br}^- \rightarrow \text{Br}_2^- + \text{Cl}^-$                                     | $8\text{D}9/(\text{cw} \cdot \text{Na})$                                     | [9] [2] |
| 586 | $\text{Br}_2^- + \text{Cl}^- \rightarrow \text{BrCl}^- + \text{Br}^-$                                     | $4.3\text{D}6/(\text{cw} \cdot \text{Na})$                                   | [9] [2] |
| 587 | $\text{BrCl}^- + \text{Cl}^- \rightarrow \text{Cl}_2^- + \text{Br}^-$                                     | $1.1\text{D}2/(\text{cw} \cdot \text{Na})$                                   | [9] [2] |
| 588 | $\text{Cl}_2^- + \text{Br}^- \rightarrow \text{BrCl}^- + \text{Cl}^-$                                     | $4\text{D}9/(\text{cw} \cdot \text{Na})$                                     | [9] [2] |
| 589 | $\text{Br}_2\text{Cl}^- \rightarrow \text{BrCl}(\text{aq}) + \text{Br}^-$                                 | $4.3\text{D}5$                                                               | [9] [2] |
| 590 | $\text{BrCl}(\text{aq}) + \text{Br}^- \rightarrow \text{Br}_2\text{Cl}^-$                                 | $7.7\text{D}9/(\text{cw} \cdot \text{Na})$                                   | [9] [2] |
| 591 | $\text{Br}_2\text{Cl}^- \rightarrow \text{Br}_2(\text{aq}) + \text{Cl}^-$                                 | $3.8\text{D}4$                                                               | [9] [2] |
| 592 | $\text{Br}_2(\text{aq}) + \text{Cl}^- \rightarrow \text{Br}_2\text{Cl}^-$                                 | $5\text{D}4/(\text{cw} \cdot \text{Na})$                                     | [9] [2] |
| 593 | $\text{BrCl}_2^- \rightarrow \text{BrCl}(\text{aq}) + \text{Cl}^-$                                        | $1.7\text{D}5$                                                               | [9] [2] |
| 594 | $\text{BrCl}(\text{aq}) + \text{Cl}^- \rightarrow \text{BrCl}_2^-$                                        | $1\text{D}6/(\text{cw} \cdot \text{Na})$                                     | [9] [2] |
| 595 | $\text{BrCl}_2^- \rightarrow \text{Br}^- + \text{Cl}_2(\text{aq})$                                        | $9\text{D}3$                                                                 | [9] [2] |
| 596 | $\text{Br}^- + \text{Cl}_2(\text{aq}) \rightarrow \text{BrCl}_2^-$                                        | $6\text{D}9/(\text{cw} \cdot \text{Na})$                                     | [9] [2] |
| 597 | $\text{Br}^- + \text{ClOH}^- \rightarrow \text{BrCl}^-$                                                   | $1\text{D}9/(\text{cw} \cdot \text{Na})$                                     | [9] [2] |
| 598 | $\text{BrCl}^- \rightarrow \text{Br}^- + \text{ClOH}^-$                                                   | $[\text{OH}^-] \cdot 3\text{D}6$                                             | [9] [2] |
| 599 | $\text{BrOH}^- + \text{Cl}^- \rightarrow \text{BrCl}^-$                                                   | $1.9\text{D}8/(\text{cw} \cdot \text{Na})$                                   | [9] [2] |
| 600 | $\text{BrCl}^- \rightarrow \text{BrOH}^- + \text{Cl}^-$                                                   | $[\text{OH}^-] \cdot 2\text{D}7$                                             | [9] [2] |
| 601 | $\text{IODINE}(\text{aq}) + \text{IODINE}(\text{aq}) \rightarrow \text{IODINE}2(\text{aq})$               | $1.1\text{D}10/(\text{cw} \cdot \text{Na})$                                  | [9] [2] |
| 602 | $\text{IODINE}(\text{aq}) + \text{I}_2^- \rightarrow \text{I}_3^-$                                        | $6.5\text{D}9/(\text{cw} \cdot \text{Na})$                                   | [9] [2] |

[1] MCMv3.3.1 ; [2] Hoffmann et al. (2016) ; [3] Wu et al. (2014) ; [4] Berndt et al. (2019) ; [5] Kukui et al. (2003)  
 [6] Atkinson et al. (2007) ; [7] Sander et al. (2006) ; [8] Atkinson et al. (2008) ; [9] Braeuer et al. (2013) ; [10] Jacobson (2005)  
 [11] Demore et al. (1997) ; [12] Berndt et al. (2020) ; [13] Kahan et al. (2012) ; [14] Burkholder et al. (2015)  
 [E] Estimate based on equilibrium coefficients ; [C] Based on pKa value from COSMOtherm ; [A] Assumed

| #   | Reaction                                                 | Rate                                                                   | Ref.    |
|-----|----------------------------------------------------------|------------------------------------------------------------------------|---------|
| 603 | $I_2^- + I_2^- \rightarrow I_3^- + I^-$                  | 2.5D9/(cw·Na)                                                          | [9] [2] |
| 604 | $I^- + O_3(aq) \rightarrow HOI(aq)$                      | $2.17D9 \cdot \exp(-8790.0 \cdot (1D0/T - 1D0/298D0)) / (cw \cdot Na)$ | [9] [2] |
| 605 | $IODINE2(aq) + HO_2(aq) \rightarrow I_2^-$               | 6D9/(cw·Na)                                                            | [9] [2] |
| 606 | $IODINE2(aq) + O_2^- \rightarrow I_2^-$                  | 6D9/(cw·Na)                                                            | [9] [2] |
| 607 | $I_3^- + HO_2(aq) \rightarrow I_2^- + I^-$               | 2.5D8/(cw·Na)                                                          | [9] [2] |
| 608 | $I_3^- + O_2^- \rightarrow I_2^- + I^-$                  | 2.5D8/(cw·Na)                                                          | [9] [2] |
| 609 | $HIO_2(aq) + H_2O_2(aq) \rightarrow IO_3^-$              | 6D1/(cw·Na)                                                            | [9] [2] |
| 610 | $IO_2^- + H_2O_2(aq) \rightarrow IO_3^-$                 | 6D1/(cw·Na)                                                            | [9] [2] |
| 611 | $IO(aq) + IO(aq) \rightarrow HOI(aq) + HIO_2(aq)$        | 1.5D9/(cw·Na)                                                          | [9] [2] |
| 612 | $IODINE2(aq) + HSO_3^- \rightarrow I^- + I^- + HSO_4^-$  | 1D6/(cw·Na)                                                            | [9] [2] |
| 613 | $HOI(aq) + SO_3^{2-} \rightarrow I^- + HSO_4^-$          | 5D9/(cw·Na)                                                            | [9] [2] |
| 614 | $HOI(aq) + HSO_3^- \rightarrow I^- + HSO_4^-$            | 5D9/(cw·Na)                                                            | [9] [2] |
| 615 | $I^- + ICl(aq) \rightarrow IODINE2(aq) + Cl^-$           | 1.1D9/(cw·Na)                                                          | [9] [2] |
| 616 | $I^- + HOCl(aq) \rightarrow ICl(aq)$                     | 3.5D11/(cw·Na)                                                         | [9] [2] |
| 617 | $I^- + HOBr(aq) \rightarrow IBr(aq)$                     | 5D9/(cw·Na)                                                            | [9] [2] |
| 618 | $HOI(aq) + Cl_2(aq) \rightarrow HIO_2(aq) + Cl^- + Cl^-$ | 1D6/(cw·Na)                                                            | [9] [2] |
| 619 | $HOI(aq) + HOCl(aq) \rightarrow HIO_2(aq) + Cl^-$        | 5D5/(cw·Na)                                                            | [9] [2] |
| 620 | $HOI(aq) + HOBr(aq) \rightarrow HIO_2(aq) + Br^-$        | 1D6/(cw·Na)                                                            | [9] [2] |
| 621 | $HIO_2(aq) + HOCl(aq) \rightarrow IO_3^- + Cl^-$         | 1.5D3/(cw·Na)                                                          | [9] [2] |
| 622 | $IO_2^- + HOCl(aq) \rightarrow IO_3^- + Cl^-$            | 1.5D3/(cw·Na)                                                          | [9] [2] |
| 623 | $HIO_2(aq) + HOBr(aq) \rightarrow IO_3^- + Br^-$         | 1D6/(cw·Na)                                                            | [9] [2] |
| 624 | $IO_2^- + HOBr(aq) \rightarrow IO_3^- + Br^-$            | 1D6/(cw·Na)                                                            | [9] [2] |
| 625 | $IODINE(aq) + I^- \rightarrow I_2^-$                     | 9.1D9/(cw·Na)                                                          | [9] [2] |
| 626 | $I_2^- \rightarrow IODINE(aq) + I^-$                     | 6.7D4                                                                  | [9] [2] |
| 627 | $IODINE2(aq) + I^- \rightarrow I_3^-$                    | 6.2D9/(cw·Na)                                                          | [9] [2] |
| 628 | $I_3^- \rightarrow IODINE2(aq) + I^-$                    | 8.7D6                                                                  | [9] [2] |
| 629 | $HI(aq) \rightarrow I^-$                                 | 5D11                                                                   | [9] [2] |
| 630 | $I^- \rightarrow HI(aq)$                                 | $[H^+] \cdot 156D0$                                                    | [9] [2] |
| 631 | $HOI(aq) \rightarrow IO^-$                               | 1.58D0                                                                 | [9] [2] |
| 632 | $IO^- \rightarrow HOI(aq)$                               | $[H^+] \cdot 5D10$                                                     | [9] [2] |
| 633 | $HOI(aq) + I^- \rightarrow IODINE2(aq)$                  | $[H^+] \cdot 4.4D12 / ((cw \cdot Na))$                                 | [9] [2] |
| 634 | $IODINE2(aq) \rightarrow HOI(aq) + I^-$                  | 3D0                                                                    | [9] [2] |
| 635 | $HOI(aq) + HOI(aq) \rightarrow HIO_2(aq) + I^-$          | 25D0/(cw·Na)                                                           | [9] [2] |
| 636 | $HIO_2(aq) + I^- \rightarrow HOI(aq) + HOI(aq)$          | $[H^+] \cdot 2D10 / ((cw \cdot Na))$                                   | [9] [2] |
| 637 | $HOI(aq) + HOI(aq) \rightarrow IO_2^- + I^-$             | 25D0/(cw·Na)                                                           | [9] [2] |
| 638 | $IO_2^- + I^- \rightarrow HOI(aq) + HOI(aq)$             | $([H^+]^2)^{D0} \cdot 2D10 / ((cw \cdot Na))$                          | [9] [2] |
| 639 | $HIO_2(aq) \rightarrow IO_2^-$                           | 1.26D9                                                                 | [9] [2] |

[1] MCMv3.3.1 ; [2] Hoffmann et al. (2016) ; [3] Wu et al. (2014) ; [4] Berndt et al. (2019) ; [5] Kukui et al. (2003)  
 [6] Atkinson et al. (2007) ; [7] Sander et al. (2006) ; [8] Atkinson et al. (2008) ; [9] Braeuer et al. (2013) ; [10] Jacobson (2005)  
 [11] Demore et al. (1997) ; [12] Berndt et al. (2020) ; [13] Kahan et al. (2012) ; [14] Burkholder et al. (2015)  
 [E] Estimate based on equilibrium coefficients ; [C] Based on pKa value from COSMOtherm ; [A] Assumed

| #   | Reaction                                                                                                                         | Rate                                                                                                              | Ref.    |
|-----|----------------------------------------------------------------------------------------------------------------------------------|-------------------------------------------------------------------------------------------------------------------|---------|
| 640 | $\text{IO}_2^- \rightarrow \text{HIO}_2(\text{aq})$                                                                              | $[\text{H}^+] \cdot 5\text{D}10$                                                                                  | [9] [2] |
| 641 | $\text{HIO}_3(\text{aq}) \rightarrow \text{IO}_3^-$                                                                              | 8.5D9                                                                                                             | [9] [2] |
| 642 | $\text{IO}_3^- \rightarrow \text{HIO}_3(\text{aq})$                                                                              | $[\text{H}^+] \cdot 5\text{D}10$                                                                                  | [9] [2] |
| 643 | $\text{HIO}_2(\text{aq}) + \text{HOI}(\text{aq}) \rightarrow \text{IO}_3^- + \text{I}^-$                                         | $2.4\text{D}2/(\text{cw} \cdot \text{Na})$                                                                        | [9] [2] |
| 644 | $\text{IO}_3^- + \text{I}^{\text{ion}} \rightarrow \text{HIO}_2(\text{aq}) + \text{HOI}(\text{aq})$                              | $([\text{H}^+]^{2\text{D}0}) \cdot 1.2\text{D}3/((\text{cw} \cdot \text{Na}))$                                    | [9] [2] |
| 645 | $\text{IO}_2^- + \text{HOI}(\text{aq}) \rightarrow \text{IO}_3^- + \text{I}^-$                                                   | $2.4\text{D}2/(\text{cw} \cdot \text{Na})$                                                                        | [9] [2] |
| 646 | $\text{IO}_3^- + \text{I}^- \rightarrow \text{IO}_2^- + \text{HOI}(\text{aq})$                                                   | $[\text{H}^+] \cdot 1.2\text{D}3/((\text{cw} \cdot \text{Na}))$                                                   | [9] [2] |
| 647 | $\text{IO}_2^- + \text{IODINE}2(\text{aq}) \rightarrow \text{IO}_3^- + \text{I}^- + \text{I}^-$                                  | $5.5\text{D}-5/(\text{cw} \cdot \text{Na})$                                                                       | [9] [2] |
| 648 | $\text{IO}_3^- + \text{I}^- + \text{I}^- \rightarrow \text{IO}_2^- + \text{IODINE}2(\text{aq})$                                  | $([\text{H}^+]^{2\text{D}0}) \cdot 4.2\text{D}8/((\text{cw} \cdot \text{Na})^{2\text{D}0})$                       | [9] [2] |
| 649 | $\text{IBr}(\text{aq}) + \text{I}^- \rightarrow \text{IODINE}2(\text{aq}) + \text{Br}^-$                                         | $2\text{D}9/(\text{cw} \cdot \text{Na})$                                                                          | [9] [2] |
| 650 | $\text{IODINE}2(\text{aq}) + \text{Br}^- \rightarrow \text{IBr}(\text{aq}) + \text{I}^-$                                         | $4.74\text{D}3/(\text{cw} \cdot \text{Na})$                                                                       | [9] [2] |
| 651 | $\text{HOI}(\text{aq}) + \text{Cl}^- \rightarrow \text{ICl}(\text{aq})$                                                          | $[\text{H}^+] \cdot 2.9\text{D}10/((\text{cw} \cdot \text{Na}))$                                                  | [9] [2] |
| 652 | $\text{ICl}(\text{aq}) \rightarrow \text{HOI}(\text{aq}) + \text{Cl}^-$                                                          | 2.4D6                                                                                                             | [9] [2] |
| 653 | $\text{HOI}(\text{aq}) + \text{Br}^- \rightarrow \text{IBr}(\text{aq})$                                                          | $[\text{H}^+] \cdot 4.1\text{D}12/((\text{cw} \cdot \text{Na}))$                                                  | [9] [2] |
| 654 | $\text{IBr}(\text{aq}) \rightarrow \text{HOI}(\text{aq}) + \text{Br}^-$                                                          | 8D5                                                                                                               | [9] [2] |
| 655 | $\text{ICl}(\text{aq}) + \text{Cl}^- \rightarrow \text{ICl}_2^-$                                                                 | $4.24\text{D}9/(\text{cw} \cdot \text{Na})$                                                                       | [9] [2] |
| 656 | $\text{ICl}_2^- \rightarrow \text{ICl}(\text{aq}) + \text{Cl}^-$                                                                 | 5.5D7                                                                                                             | [9] [2] |
| 657 | $\text{IBr}(\text{aq}) + \text{Br}^- \rightarrow \text{IBr}_2^-$                                                                 | $4.93\text{D}6/(\text{cw} \cdot \text{Na})$                                                                       | [9] [2] |
| 658 | $\text{IBr}_2^- \rightarrow \text{IBr}(\text{aq}) + \text{Br}^-$                                                                 | 1.7D5                                                                                                             | [9] [2] |
| 659 | $\text{ICl}(\text{aq}) + \text{Br}^- \rightarrow \text{IClBr}^-$                                                                 | $7.7\text{D}9/(\text{cw} \cdot \text{Na})$                                                                        | [9] [2] |
| 660 | $\text{IClBr}^- \rightarrow \text{ICl}(\text{aq}) + \text{Br}^-$                                                                 | 4.3D5                                                                                                             | [9] [2] |
| 661 | $\text{IBr}(\text{aq}) + \text{Cl}^- \rightarrow \text{IClBr}^-$                                                                 | $5\text{D}4/(\text{cw} \cdot \text{Na})$                                                                          | [9] [2] |
| 662 | $\text{IClBr}^- \rightarrow \text{IBr}(\text{aq}) + \text{Cl}^-$                                                                 | 3.8D4                                                                                                             | [9] [2] |
| 663 | $\text{DMS}(\text{aq}) + \text{O}_3(\text{aq}) \rightarrow \text{DMSO}(\text{aq})$                                               | $8.61\text{D}8 \cdot \exp(-2600 \cdot (1\text{D}0/\text{T}-1\text{D}0/298\text{D}0))/(\text{cw} \cdot \text{Na})$ | [2]     |
| 664 | $\text{DMS}(\text{aq}) + \text{OH}(\text{aq}) \rightarrow \text{DMSO}(\text{aq}) + \text{HO}_2(\text{aq})$                       | $1.9\text{D}10/(\text{cw} \cdot \text{Na})$                                                                       | [2]     |
| 665 | $\text{DMS}(\text{aq}) + \text{Cl}_2^- \rightarrow \text{CH}_3\text{SCH}_3\text{Cl}(\text{aq}) + \text{Cl}^-$                    | $3\text{D}9/(\text{cw} \cdot \text{Na})$                                                                          | [2]     |
| 666 | $\text{DMS}(\text{aq}) + \text{Br}_2^- \rightarrow \text{CH}_3\text{SCH}_3\text{Br}(\text{aq}) + \text{Br}^-$                    | $3.2\text{D}9/(\text{cw} \cdot \text{Na})$                                                                        | [2]     |
| 667 | $\text{DMS}(\text{aq}) + \text{H}_2\text{O}_2(\text{aq}) \rightarrow \text{DMSO}(\text{aq})$                                     | $3.4\text{D}-2/(\text{cw} \cdot \text{Na})$                                                                       | [2]     |
| 668 | $\text{CH}_3\text{SCH}_3\text{Cl}(\text{aq}) + \text{O}_2(\text{aq}) \rightarrow \text{DMSO}(\text{aq}) + \text{ClO}(\text{aq})$ | $2.41\text{D}3/(\text{cw} \cdot \text{Na})$                                                                       | [9] [2] |
| 669 | $\text{CH}_3\text{SCH}_3\text{Br}(\text{aq}) + \text{O}_2(\text{aq}) \rightarrow \text{DMSO}(\text{aq}) + \text{BrO}(\text{aq})$ | $6.02\text{D}2/(\text{cw} \cdot \text{Na})$                                                                       | [2]     |
| 670 | $\text{DMSO}(\text{aq}) + \text{O}_3(\text{aq}) \rightarrow \text{DMSO}_2(\text{aq})$                                            | $3\text{D}0/(\text{cw} \cdot \text{Na})$                                                                          | [2]     |
| 671 | $\text{DMSO}(\text{aq}) + \text{OH}(\text{aq}) \rightarrow \text{MSIA}(\text{aq})$                                               | $6.65\text{D}9 \cdot \exp(-1270 \cdot (1\text{D}0/\text{T}-1\text{D}0/298\text{D}0))/(\text{cw} \cdot \text{Na})$ | [2]     |
| 672 | $\text{DMSO}(\text{aq}) + \text{SO}_4^{2-} \rightarrow \text{DMSO}^- + \text{SO}_4^{2-}$                                         | $2.97\text{D}9 \cdot \exp(-1440 \cdot (1\text{D}0/\text{T}-1\text{D}0/298\text{D}0))/(\text{cw} \cdot \text{Na})$ | [2]     |
| 673 | $\text{DMSO}(\text{aq}) + \text{Cl}(\text{aq}) \rightarrow \text{CH}_3\text{SOCH}_3\text{Cl}(\text{aq})$                         | $6.3\text{D}9/(\text{cw} \cdot \text{Na})$                                                                        | [2]     |
| 674 | $\text{DMSO}(\text{aq}) + \text{Cl}_2^- \rightarrow \text{CH}_3\text{SOCH}_3\text{Cl}(\text{aq}) + \text{Cl}^-$                  | $1.6\text{D}7/(\text{cw} \cdot \text{Na})$                                                                        | [2]     |
| 675 | $\text{DMSO}(\text{aq}) + \text{H}_2\text{O}_2(\text{aq}) \rightarrow \text{DMSO}_2(\text{aq})$                                  | $2.75\text{D}-6/(\text{cw} \cdot \text{Na})$                                                                      | [2]     |
| 676 | $\text{DMSO}^- + \text{Br}^- \rightarrow \text{CH}_3\text{SOCH}_3\text{Br}(\text{aq})$                                           | $5\text{D}9/(\text{cw} \cdot \text{Na})$                                                                          | [2]     |

[1] MCMv3.3.1 ; [2] Hoffmann et al. (2016) ; [3] Wu et al. (2014) ; [4] Berndt et al. (2019) ; [5] Kukui et al. (2003)  
 [6] Atkinson et al. (2007) ; [7] Sander et al. (2006) ; [8] Atkinson et al. (2008) ; [9] Braeuer et al. (2013) ; [10] Jacobson (2005)  
 [11] Demore et al. (1997) ; [12] Berndt et al. (2020) ; [13] Kahan et al. (2012) ; [14] Burkholder et al. (2015)  
 [E] Estimate based on equilibrium coefficients ; [C] Based on pKa value from COSMOtherm ; [A] Assumed

| #   | Reaction                                                                                                                                                 | Rate                                        | Ref. |
|-----|----------------------------------------------------------------------------------------------------------------------------------------------------------|---------------------------------------------|------|
| 677 | $\text{CH}_3\text{SOCH}_2\text{Br}(\text{aq}) + \text{Br}^- \rightarrow \text{DMSO}(\text{aq}) + \text{Br}_2^-$                                          | 2.6D8/(cw·Na)                               | [2]  |
| 678 | $\text{CH}_3\text{SOCH}_2\text{Cl}(\text{aq}) \rightarrow \text{MSIA}(\text{aq}) + \text{HCl}(\text{aq})$                                                | m(H <sub>2</sub> O)·1D7                     | [2]  |
| 679 | $\text{CH}_3\text{SOCH}_2\text{OH}(\text{aq}) \rightarrow \text{MSIA}(\text{aq})$                                                                        | 1D7                                         | [2]  |
| 680 | $\text{DMSO}_2(\text{aq}) + \text{OH}(\text{aq}) \rightarrow \text{CH}_3\text{SO}_2\text{CH}_2(\text{aq})$                                               | 1.77D7·exp(-1690·(1D0/T-1D0/298D0))/(cw·Na) | [2]  |
| 681 | $\text{DMSO}_2(\text{aq}) + \text{SO}_4^{2-} \rightarrow \text{CH}_3\text{SO}_2\text{CH}_2(\text{aq}) + \text{SO}_4^{2-}$                                | 3.95D6·exp(-1360·(1D0/T-1D0/298D0))/(cw·Na) | [2]  |
| 682 | $\text{DMSO}_2(\text{aq}) + \text{Cl}(\text{aq}) \rightarrow \text{CH}_3\text{SO}_2\text{CH}_2(\text{aq}) + \text{HCl}(\text{aq})$                       | 8.2D5/(cw·Na)                               | [2]  |
| 683 | $\text{DMSO}_2(\text{aq}) + \text{Cl}_2^- \rightarrow \text{CH}_3\text{SO}_2\text{CH}_2(\text{aq}) + \text{HCl}(\text{aq}) + \text{Cl}^-$                | 8.24D3/(cw·Na)                              | [2]  |
| 684 | $\text{DMSO}_2(\text{aq}) + \text{O}_2(\text{aq}) \rightarrow \text{CH}_3\text{SO}_2\text{CH}_2\text{O}_2(\text{aq})$                                    | 2D9/(cw·Na)                                 | [2]  |
| 685 | $\text{CH}_3\text{SO}_2\text{CH}_2\text{O}_2(\text{aq}) + \text{RO}_2(\text{aq}) \rightarrow \text{CH}_3\text{SO}_2(\text{aq}) + \text{HCHO}(\text{aq})$ | 7D3/(cw·Na)                                 | [2]  |
| 686 | $\text{MSIA}(\text{aq}) + \text{O}_3(\text{aq}) \rightarrow \text{CH}_3\text{SO}_3\text{H}(\text{aq})$                                                   | 3.5D7/(cw·Na)                               | [2]  |
| 687 | $\text{MSIA}(\text{aq}) + \text{OH}(\text{aq}) \rightarrow \text{CH}_3\text{SO}_3\text{H}_2(\text{aq})$                                                  | 6D9/(cw·Na)                                 | [2]  |
| 688 | $\text{CH}_3\text{SO}_2^- + \text{OH}(\text{aq}) \rightarrow \text{CH}_3\text{SO}_2(\text{aq})$                                                          | 0.9·1.2D10/(cw·Na)                          | [2]  |
| 689 | $\text{CH}_3\text{SO}_2^- + \text{OH}(\text{aq}) \rightarrow \text{HSO}_3^-$                                                                             | 0.1·1.2D10/(cw·Na)                          | [2]  |
| 690 | $\text{CH}_3\text{SO}_2^- + \text{SO}_4^{2-} \rightarrow \text{CH}_3\text{SO}_2(\text{aq}) + \text{SO}_4^{2-}$                                           | 1D9/(cw·Na)                                 | [2]  |
| 691 | $\text{CH}_3\text{SO}_2^- + \text{Cl}_2^- \rightarrow \text{CH}_3\text{SO}_2(\text{aq}) + \text{Cl}^- + \text{Cl}^-$                                     | 8D8/(cw·Na)                                 | [2]  |
| 692 | $\text{CH}_3\text{SO}_2^- + \text{H}_2\text{O}_2(\text{aq}) \rightarrow \text{CH}_3\text{SO}_3^-$                                                        | 1.2D-2/(cw·Na)                              | [2]  |
| 693 | $\text{CH}_3\text{SO}_2^- + \text{O}_3(\text{aq}) \rightarrow \text{CH}_3\text{SO}_3^-$                                                                  | 2D6/(cw·Na)                                 | [2]  |
| 694 | $\text{CH}_3\text{SO}_3\text{H}_2(\text{aq}) + \text{O}_2(\text{aq}) \rightarrow \text{CH}_3\text{SO}_3\text{H}(\text{aq}) + \text{HO}_2(\text{aq})$     | 1.2D9/(cw·Na)                               | [2]  |
| 695 | $\text{CH}_3\text{SO}_3\text{H}(\text{aq}) + \text{OH}(\text{aq}) \rightarrow \text{CH}_2\text{SO}_3\text{H}(\text{aq})$                                 | 1.5D7/(cw·Na)                               | [2]  |
| 696 | $\text{CH}_3\text{SO}_3^- + \text{OH}(\text{aq}) \rightarrow \text{CH}_2\text{SO}_3^-$                                                                   | 1.29D7·exp(-2630·(1D0/T-1D0/298D0))/(cw·Na) | [2]  |
| 697 | $\text{CH}_3\text{SO}_3^- + \text{SO}_4^{2-} \rightarrow \text{CH}_3\text{SO}_3(\text{aq}) + \text{SO}_4^{2-}$                                           | 1.13D4·exp(-2490·(1D0/T-1D0/298D0))/(cw·Na) | [2]  |
| 698 | $\text{CH}_3\text{SO}_3^- + \text{Cl}(\text{aq}) \rightarrow \text{CH}_3\text{SO}_3(\text{aq}) + \text{Cl}^-$                                            | 4.9D5/(cw·Na)                               | [2]  |
| 699 | $\text{CH}_3\text{SO}_3^- + \text{Cl}_2^- \rightarrow \text{CH}_3\text{SO}_3(\text{aq}) + \text{Cl}^- + \text{Cl}^-$                                     | 3.89D3/(cw·Na)                              | [2]  |
| 700 | $\text{CH}_3\text{SO}_2(\text{aq}) + \text{OH}(\text{aq}) \rightarrow \text{CH}_3\text{SO}_3\text{H}(\text{aq})$                                         | 1D10/(cw·Na)                                | [2]  |
| 701 | $\text{CH}_3\text{SO}_2(\text{aq}) + \text{O}_3(\text{aq}) \rightarrow \text{CH}_3\text{SO}_3(\text{aq})$                                                | 1.5D9/(cw·Na)                               | [2]  |
| 702 | $\text{CH}_3\text{SO}_2(\text{aq}) + \text{SO}_3^{2-} \rightarrow \text{CH}_3\text{SO}_2^- + \text{SO}_4^{2-}$                                           | 1.7D9/(cw·Na)                               | [2]  |
| 703 | $\text{CH}_3\text{SO}_2(\text{aq}) \rightarrow \text{SO}_2(\text{aq})$                                                                                   | 8.3D4                                       | [2]  |
| 704 | $\text{CH}_3\text{SO}_2(\text{aq}) + \text{O}_2(\text{aq}) \rightarrow \text{CH}_3\text{SO}_2\text{O}_2(\text{aq})$                                      | 1.2D9/(cw·Na)                               | [2]  |
| 705 | $\text{CH}_3\text{SO}_2(\text{aq}) + \text{CH}_3\text{SO}_2(\text{aq}) \rightarrow \text{MSIA}(\text{aq}) + \text{CH}_3\text{SO}_3\text{H}(\text{aq})$   | 8D8/(cw·Na)                                 | [2]  |
| 706 | $\text{CH}_3\text{SO}_2\text{O}_2(\text{aq}) + \text{CH}_3\text{SO}_2^- \rightarrow \text{CH}_3\text{SO}_3^- + \text{CH}_3\text{SO}_3(\text{aq})$        | 6.2D8/(cw·Na)                               | [2]  |
| 707 | $\text{CH}_3\text{SO}_3(\text{aq}) + \text{CH}_3\text{SO}_2^- \rightarrow \text{CH}_3\text{SO}_3^- + \text{CH}_3\text{SO}_2(\text{aq})$                  | 1D8/(cw·Na)                                 | [2]  |
| 708 | $\text{CH}_3\text{SO}_3(\text{aq}) \rightarrow \text{SO}_3(\text{aq})$                                                                                   | 8.3D4                                       | [2]  |
| 709 | $\text{CH}_3\text{SO}_3(\text{aq}) + \text{HO}_2(\text{aq}) \rightarrow \text{CH}_3\text{SO}_3\text{H}(\text{aq})$                                       | 8.3D5/(cw·Na)                               | [2]  |
| 710 | $\text{CH}_2\text{SO}_3\text{H}(\text{aq}) + \text{O}_2(\text{aq}) \rightarrow \text{O}_2\text{CH}_2\text{SO}_3\text{H}(\text{aq})$                      | 2D9/(cw·Na)                                 | [2]  |
| 711 | $\text{CH}_2\text{SO}_3^- + \text{O}_2(\text{aq}) \rightarrow \text{O}_2\text{CH}_2\text{SO}_3^-$                                                        | 2D9/(cw·Na)                                 | [2]  |
| 712 | $\text{O}_2\text{CH}_2\text{SO}_3^- \rightarrow \text{HCHO}(\text{aq}) + \text{SO}_3^-$                                                                  | [H <sup>+</sup> ]·7D3                       | [2]  |
| 713 | $\text{MSIA}(\text{aq}) \rightarrow \text{CH}_3\text{SO}_2^-$                                                                                            | 1.2D8                                       | [C]  |

[1] MCMv3.3.1 ; [2] Hoffmann et al. (2016) ; [3] Wu et al. (2014) ; [4] Berndt et al. (2019) ; [5] Kukui et al. (2003)  
 [6] Atkinson et al. (2007) ; [7] Sander et al. (2006) ; [8] Atkinson et al. (2008) ; [9] Braeuer et al. (2013) ; [10] Jacobson (2005)  
 [11] Demore et al. (1997) ; [12] Berndt et al. (2020) ; [13] Kahan et al. (2012) ; [14] Burkholder et al. (2015)  
 [E] Estimate based on equilibrium coefficients ; [C] Based on pKa value from COSMOtherm ; [A] Assumed

| #   | Reaction                                                                                             | Rate                                                                                                                                                                                                               | Ref.    |
|-----|------------------------------------------------------------------------------------------------------|--------------------------------------------------------------------------------------------------------------------------------------------------------------------------------------------------------------------|---------|
| 714 | $\text{CH}_3\text{SO}_2^- \rightarrow \text{MSIA}(\text{aq})$                                        | $[\text{H}^+] \cdot 5\text{D}10$                                                                                                                                                                                   | [2]     |
| 715 | $\text{CH}_3\text{SO}_3\text{H}(\text{aq}) \rightarrow \text{CH}_3\text{SO}_3^-$                     | 4.25D13                                                                                                                                                                                                            | [C]     |
| 716 | $\text{CH}_3\text{SO}_3^- \rightarrow \text{CH}_3\text{SO}_3\text{H}(\text{aq})$                     | $[\text{H}^+] \cdot 5\text{D}10$                                                                                                                                                                                   | [2]     |
| 717 | $\text{O}_2\text{CH}_2\text{SO}_3\text{H}(\text{aq}) \rightarrow \text{O}_2\text{CH}_2\text{SO}_3^-$ | 3.65D12                                                                                                                                                                                                            | [2]     |
| 718 | $\text{O}_2\text{CH}_2\text{SO}_3^- \rightarrow \text{O}_2\text{CH}_2\text{SO}_3\text{H}(\text{aq})$ | $[\text{H}^+] \cdot 5\text{D}10$                                                                                                                                                                                   | [2]     |
| 719 | $\text{Cl}^- + \text{DMSO}^- \rightarrow \text{CH}_3\text{SOCH}_2\text{Cl}(\text{aq})$               | 1D10/(cw·Na)                                                                                                                                                                                                       | [2]     |
| 720 | $\text{CH}_3\text{SOCH}_2\text{Cl}(\text{aq}) \rightarrow \text{Cl}^- + \text{DMSO}^-$               | 3.03D7                                                                                                                                                                                                             | [2]     |
| 721 | $\text{DMSO}^- \rightarrow \text{CH}_3\text{SOCH}_2\text{OH}(\text{aq})$                             | $m(\text{H}_2\text{O}) \cdot 1.25\text{D}5$                                                                                                                                                                        | [2]     |
| 722 | $\text{CH}_3\text{SOCH}_2\text{OH}(\text{aq}) \rightarrow \text{DMSO}^-$                             | $[\text{H}^+] \cdot 5\text{D}10$                                                                                                                                                                                   | [2]     |
| 723 | $\text{HPMTF}(\text{aq}) + \text{OH}(\text{aq}) \rightarrow \text{HOCH}_2\text{SCO}(\text{aq})$      | 1D10/(cw·Na)                                                                                                                                                                                                       | [E*]    |
| 724 | $\text{SO}_2(\text{aq}) \rightarrow \text{HSO}_3^-$                                                  | 1D12                                                                                                                                                                                                               | [E][2]  |
| 725 | $\text{HSO}_3^- \rightarrow \text{SO}_2(\text{aq})$                                                  | $[\text{H}^+] \cdot (1\text{D}12 / (1.71\text{D}-2 \cdot \exp(7.04\text{D}0 \cdot (298\text{D}0 / \text{T} - 1\text{D}0))))$                                                                                       | [E][2]  |
| 726 | $\text{HSO}_3^- \rightarrow \text{SO}_3^{2-}$                                                        | 1D12                                                                                                                                                                                                               | [E][2]  |
| 727 | $\text{SO}_3^{2-} \rightarrow \text{HSO}_3^-$                                                        | $[\text{H}^+] \cdot (1\text{D}12 / (5.99\text{D}-8 \cdot \exp(3.74\text{D}0 \cdot (298\text{D}0 / \text{T} - 1\text{D}0))))$                                                                                       | [E][2]  |
| 728 | $\text{HSO}_4^- \rightarrow \text{SO}_4^{2-}$                                                        | 1D12                                                                                                                                                                                                               | [E][2]  |
| 729 | $\text{SO}_4^{2-} \rightarrow \text{HSO}_4^-$                                                        | $[\text{H}^+] \cdot (1\text{D}12 / (1.02\text{D}-2 \cdot (\exp(8.85\text{D}0 \cdot (298\text{D}0 / \text{T} - 1\text{D}0)) + 25.14 \cdot (1\text{D}0 - 298\text{D}0 / \text{T} + \log(298\text{D}0 / \text{T}))))$ | [E][2]  |
| 730 | $\text{HO}_2(\text{aq}) \rightarrow \text{O}_2^-$                                                    | 1D12                                                                                                                                                                                                               | [E][10] |
| 731 | $\text{O}_2^- \rightarrow \text{HO}_2(\text{aq})$                                                    | $[\text{H}^+] \cdot (1\text{D}12 / 3.5\text{D}-5)$                                                                                                                                                                 | [E][10] |
| 732 | $\text{H}_2\text{O}_2(\text{aq}) \rightarrow \text{HO}_2^-$                                          | 1D12                                                                                                                                                                                                               | [E][10] |
| 733 | $\text{HO}_2^- \rightarrow \text{H}_2\text{O}_2(\text{aq})$                                          | $[\text{H}^+] \cdot (1\text{D}12 / (2.21\text{D}-12 \cdot \exp(-12.52\text{D}0 \cdot (298\text{D}0 / \text{T} - 1\text{D}0))))$                                                                                    | [E][10] |
| 734 | $\text{H}_2\text{O}_2(\text{aq}) + \text{HSO}_3^- \rightarrow \text{HSO}_4^-$                        | $([\text{H}^+] \cdot (7.45\text{D}7 \cdot \exp(-15.96\text{D}0 \cdot (298\text{D}0 / \text{T} - 1\text{D}0))))$                                                                                                    | [2]     |
| 735 | $\text{HSO}_3^- + \text{HO}_2(\text{aq}) \rightarrow \text{HSO}_4^- + \text{OH}(\text{aq})$          | 4.35D5/(cw·Na)                                                                                                                                                                                                     | [2]     |
| 736 | $\text{SO}_3^{2-} + \text{HO}_2(\text{aq}) \rightarrow \text{SO}_4^{2-} + \text{OH}(\text{aq})$      | 5.65D5/(cw·Na)                                                                                                                                                                                                     | [2]     |
| 737 | $\text{HSO}_3^- + \text{O}_2^- \rightarrow \text{HSO}_4^- + \text{OH}(\text{aq})$                    | 4.35D4/(cw·Na)                                                                                                                                                                                                     | [2]     |
| 738 | $\text{SO}_3^{2-} + \text{O}_2^- \rightarrow \text{SO}_4^{2-} + \text{OH}(\text{aq})$                | 5.65D4/(cw·Na)                                                                                                                                                                                                     | [2]     |
| 739 | $\text{HSO}_3^- + \text{OH}(\text{aq}) \rightarrow \text{SO}_5^-$                                    | $4.2\text{D}9 \cdot \exp(-5.03\text{D}0 \cdot (298\text{D}0 / \text{T} - 1\text{D}0)) / (\text{cw} \cdot \text{Na})$                                                                                               | [2]     |
| 740 | $\text{SO}_3^{2-} + \text{OH}(\text{aq}) \rightarrow \text{SO}_5^-$                                  | $4.6\text{D}9 \cdot \exp(-5.03\text{D}0 \cdot (298\text{D}0 / \text{T} - 1\text{D}0)) / (\text{cw} \cdot \text{Na})$                                                                                               | [2]     |
| 741 | $\text{SO}_2(\text{aq}) + \text{O}_3(\text{aq}) \rightarrow \text{HSO}_4^-$                          | 2.4D4/(cw·Na)                                                                                                                                                                                                      | [2]     |
| 742 | $\text{HSO}_3^- + \text{O}_3(\text{aq}) \rightarrow \text{HSO}_4^-$                                  | $3.7\text{D}5 \cdot \exp(-18.56\text{D}0 \cdot (298\text{D}0 / \text{T} - 1\text{D}0)) / (\text{cw} \cdot \text{Na})$                                                                                              | [2]     |
| 743 | $\text{SO}_3^{2-} + \text{O}_3(\text{aq}) \rightarrow \text{SO}_4^{2-}$                              | $1.5\text{D}9 \cdot \exp(-17.72\text{D}0 \cdot (298\text{D}0 / \text{T} - 1\text{D}0)) / (\text{cw} \cdot \text{Na})$                                                                                              | [2]     |
| 744 | $\text{HSO}_3^- + \text{SO}_5^- \rightarrow \text{HSO}_5^- + \text{SO}_5^-$                          | $3\text{D}5 \cdot \exp(-10.4\text{D}0 \cdot (298\text{D}0 / \text{T} - 1\text{D}0)) / (\text{cw} \cdot \text{Na})$                                                                                                 | [2]     |
| 745 | $\text{SO}_3^{2-} + \text{SO}_5^- \rightarrow \text{HSO}_5^- + \text{SO}_5^-$                        | $1.3\text{D}7 \cdot \exp(-6.71\text{D}0 \cdot (298\text{D}0 / \text{T} - 1\text{D}0)) / (\text{cw} \cdot \text{Na})$                                                                                               | [2]     |
| 746 | $\text{HSO}_3^- + \text{SO}_4^- \rightarrow \text{HSO}_4^- + \text{SO}_5^-$                          | $1.3\text{D}9 \cdot \exp(-5.03\text{D}0 \cdot (298\text{D}0 / \text{T} - 1\text{D}0)) / (\text{cw} \cdot \text{Na})$                                                                                               | [2]     |
| 747 | $\text{SO}_3^{2-} + \text{SO}_4^- \rightarrow \text{SO}_4^{2-} + \text{SO}_5^-$                      | $5.3\text{D}8 \cdot \exp(-5.03\text{D}0 \cdot (298\text{D}0 / \text{T} - 1\text{D}0)) / (\text{cw} \cdot \text{Na})$                                                                                               | [2]     |
| 748 | $\text{HSO}_3^- + \text{HSO}_5^- \rightarrow \text{HSO}_4^- + \text{HSO}_4^-$                        | $7.1\text{D}6 \cdot \exp(-10.47\text{D}0 \cdot (298\text{D}0 / \text{T} - 1\text{D}0)) / (\text{cw} \cdot \text{Na})$                                                                                              | [2]     |
| 749 | $\text{H}_2\text{O}_2(\text{aq}) + \text{OH}(\text{aq}) \rightarrow \text{HO}_2(\text{aq})$          | $2.7\text{D}7 \cdot \exp(-5.7\text{D}0 \cdot (298\text{D}0 / \text{T} - 1\text{D}0)) / (\text{cw} \cdot \text{Na})$                                                                                                | [2]     |

[1] MCMv3.3.1 ; [2] Hoffmann et al. (2016) ; [3] Wu et al. (2014) ; [4] Berndt et al. (2019) ; [5] Kukui et al. (2003)  
 [6] Atkinson et al. (2007) ; [7] Sander et al. (2006) ; [8] Atkinson et al. (2008) ; [9] Braeuer et al. (2013) ; [10] Jacobson (2005)  
 [11] Demore et al. (1997) ; [12] Berndt et al. (2020) ; [13] Kahan et al. (2012) ; [14] Burkholder et al. (2015)  
 [E] Estimate based on equilibrium coefficients ; [C] Based on pKa value from COSMOtherm ; [A] Assumed

| #   | Reaction                                                                                                | Rate                                                                                                             | Ref.    |
|-----|---------------------------------------------------------------------------------------------------------|------------------------------------------------------------------------------------------------------------------|---------|
| 750 | $\text{H}_2\text{O}_2(\text{aq}) + \text{SO}_4^- \rightarrow \text{HO}_2(\text{aq}) + \text{SO}_4^{2-}$ | $1.2\text{D}3 \cdot \exp(-6.71\text{D}0 \cdot (298\text{D}0/\text{T}-1\text{D}0)) / (\text{cw} \cdot \text{Na})$ | [2]     |
| 751 | $\text{OH}(\text{aq}) + \text{HO}_2(\text{aq}) \rightarrow \text{DUMMY}$                                | $7\text{D}9 \cdot \exp(-5.03\text{D}0 \cdot (298\text{D}0/\text{T}-1\text{D}0)) / (\text{cw} \cdot \text{Na})$   | [2]     |
| 752 | $\text{OH}(\text{aq}) + \text{O}_2^- \rightarrow \text{DUMMY}$                                          | $1\text{D}10 \cdot \exp(-5.03\text{D}0 \cdot (298\text{D}0/\text{T}-1\text{D}0)) / (\text{cw} \cdot \text{Na})$  | [2]     |
| 753 | $\text{OH}(\text{aq}) + \text{HSO}_5^- \rightarrow \text{SO}_5^-$                                       | $1.7\text{D}7 \cdot \exp(-6.38\text{D}0 \cdot (298\text{D}0/\text{T}-1\text{D}0)) / (\text{cw} \cdot \text{Na})$ | [2]     |
| 754 | $\text{O}_2^- + \text{O}_3(\text{aq}) \rightarrow \text{OH}(\text{aq})$                                 | $1.5\text{D}9 \cdot \exp(-5.03\text{D}0 \cdot (298\text{D}0/\text{T}-1\text{D}0)) / (\text{cw} \cdot \text{Na})$ | [2]     |
| 755 | $\text{HO}_2(\text{aq}) + \text{HO}_2(\text{aq}) \rightarrow \text{H}_2\text{O}_2(\text{aq})$           | $8.6\text{D}5 \cdot \exp(-7.94\text{D}0 \cdot (298\text{D}0/\text{T}-1\text{D}0)) / (\text{cw} \cdot \text{Na})$ | [2]     |
| 756 | $\text{HO}_2(\text{aq}) + \text{O}_2^- \rightarrow \text{H}_2\text{O}_2(\text{aq})$                     | $1\text{D}8 \cdot \exp(-5.03\text{D}0 \cdot (298\text{D}0/\text{T}-1\text{D}0)) / (\text{cw} \cdot \text{Na})$   | [2]     |
| 757 | $\text{HO}_2(\text{aq}) + \text{SO}_4^- \rightarrow \text{SO}_4^{2-}$                                   | $5\text{D}9 \cdot \exp(-5.03\text{D}0 \cdot (298\text{D}0/\text{T}-1\text{D}0)) / (\text{cw} \cdot \text{Na})$   | [2]     |
| 758 | $\text{O}_2^- + \text{SO}_4^- \rightarrow \text{SO}_4^{2-}$                                             | $5\text{D}9 \cdot \exp(-5.03\text{D}0 \cdot (298\text{D}0/\text{T}-1\text{D}0)) / (\text{cw} \cdot \text{Na})$   | [2]     |
| 759 | $\text{O}_2^- + \text{SO}_5^- \rightarrow \text{HSO}_5^-$                                               | $1\text{D}8 \cdot \exp(-5.03\text{D}0 \cdot (298\text{D}0/\text{T}-1\text{D}0)) / (\text{cw} \cdot \text{Na})$   | [2]     |
| 760 | $\text{SO}_5^- + \text{SO}_5^- \rightarrow \text{SO}_4^- + \text{SO}_4^-$                               | $6\text{D}8 \cdot \exp(-5.03\text{D}0 \cdot (298\text{D}0/\text{T}-1\text{D}0)) / (\text{cw} \cdot \text{Na})$   | [2]     |
| 761 | $\text{NH}_3(\text{aq}) \rightarrow \text{NH}_4^-$                                                      | $[\text{H}^+]$ · 1D10                                                                                            | [E]     |
| 762 | $\text{NH}_4^- \rightarrow \text{NH}_3(\text{aq})$                                                      | $1\text{D}10 / (1.7882\text{D}9 \cdot \exp(21.0200 \cdot (298\text{D}0/\text{T}-1\text{D}0)))$                   | [E]     |
| 763 | $\text{SO}_3(\text{aq}) \rightarrow \text{HSO}_4^-$                                                     | 1D10                                                                                                             | [A]     |
| 764 | $\text{Cl}(\text{aq}) + \text{Cl}(\text{aq}) \rightarrow \text{Cl}_2(\text{aq})$                        | $8.75\text{D}7 / (\text{cw} \cdot \text{Na})$                                                                    | [9] [2] |

[1] MCMv3.3.1 ; [2] Hoffmann et al. (2016) ; [3] Wu et al. (2014) ; [4] Berndt et al. (2019) ; [5] Kukui et al. (2003)  
 [6] Atkinson et al. (2007) ; [7] Sander et al. (2006) ; [8] Atkinson et al. (2008) ; [9] Braeuer et al. (2013) ; [10] Jacobson (2005)  
 [11] Demore et al. (1997) ; [12] Berndt et al. (2020) ; [13] Kahan et al. (2012) ; [14] Burkholder et al. (2015)  
 [E] Estimate based on equilibrium coefficients ; [C] Based on pKa value from COSMOtherm ; [A] Assumed

### S1.1 Chamber wall effects

Table S2: Temperature dependant Henry's law solubility and wall mass accommodation coefficients . COSMOtherm calculation were estimated at 298K and coupled with temperature dependence from other sources.

| Type              | $\text{H}^{cP}$                                                                                | $\alpha_w$ | Ref. |
|-------------------|------------------------------------------------------------------------------------------------|------------|------|
| Cl <sub>2</sub>   | $9.15\text{D}-2 \cdot \exp(2490\text{D}0 \cdot (1\text{D}0/\text{T}-1\text{D}0/298\text{D}0))$ | -          | [1]  |
| Cl                | 0.2D0                                                                                          | -          | [1]  |
| ClO               | $660\text{D}0 \cdot \exp(5862\text{D}0 \cdot (1\text{D}0/\text{T}-1\text{D}0/298\text{D}0))$   | -          | [1]  |
| ClO <sub>2</sub>  | $1\text{D}0 \cdot \exp(-3300\text{D}0 \cdot (1\text{D}0/\text{T}-1\text{D}0/298\text{D}0))$    | -          | [1]  |
| HCl               | $1.1\text{D}0 \cdot \exp(2020\text{D}0 \cdot (1\text{D}0/\text{T}-1\text{D}0/298\text{D}0))$   | -          | [1]  |
| HOCl              | $660\text{D}0 \cdot \exp(5862\text{D}0 \cdot (1\text{D}0/\text{T}-1\text{D}0/298\text{D}0))$   | -          | [1]  |
| ClNO              | 5D-2                                                                                           | -          | [1]  |
| ClNO <sub>2</sub> | 4.6D-2                                                                                         | -          | [1]  |
| ClNO <sub>3</sub> | $2.1\text{D}5 \cdot \exp(8700\text{D}0 \cdot (1\text{D}0/\text{T}-1\text{D}0/298\text{D}0))$   | -          | [1]  |
| Br <sub>2</sub>   | $0.76\text{D}0 \cdot \exp(4100\text{D}0 \cdot (1\text{D}0/\text{T}-1\text{D}0/298\text{D}0))$  | -          | [1]  |
| Br                | 1.2D0                                                                                          | -          | [1]  |

[1] Braeuer et al. (2013) ; [2] Jacobson (2005) ; [3] Hoffmann et al. (2016)  
 [4] Kulmala and Laaksonen (1990) ; [C] COSMOtherm with temperature dependence from Hoffmann et al. (2016); [A] Assumed

... Solubility continued

| Type                           | H <sup>CP</sup>                                                                                       | $\alpha_w$ | Ref. |
|--------------------------------|-------------------------------------------------------------------------------------------------------|------------|------|
| BrO                            | 93D0·exp(5862D0·(1D0/T-1D0/298D0))                                                                    | -          | [1]  |
| BrNO <sub>2</sub>              | 0.3                                                                                                   | -          | [1]  |
| BrNO <sub>3</sub>              | 2.1D5·exp(8700D0·(1D0/T-1D0/298D0))                                                                   | -          | [1]  |
| BrCl                           | 0.94D0·exp(5600D0·(1D0/T-1D0/298D0))                                                                  | -          | [1]  |
| I <sub>2</sub>                 | 3D0·exp(4431D0·(1D0/T-1D0/298D0))                                                                     | -          | [1]  |
| I                              | 8D-2                                                                                                  | -          | [1]  |
| IO                             | 450D0·exp(5862D0·(1D0/T-1D0/298D0))                                                                   | -          | [1]  |
| OIO                            | 2.1D5·exp(8700D0·(1D0/T-1D0/298D0))                                                                   | -          | [1]  |
| I <sub>2</sub> O <sub>2</sub>  | 2.1D5·exp(8700D0·(1D0/T-1D0/298D0))                                                                   | -          | [1]  |
| HI                             | 2.5D0·exp(9800D0·(1D0/T-1D0/298D0))                                                                   | -          | [1]  |
| HOI                            | 450D0·exp(5862D0·(1D0/T-1D0/298D0))                                                                   | -          | [1]  |
| HIO <sub>3</sub>               | 2.1D5·exp(8700D0·(1D0/T-1D0/298D0))                                                                   | -          | [1]  |
| INO <sub>2</sub>               | 2.1D5·exp(8700D0·(1D0/T-1D0/298D0))                                                                   | -          | [1]  |
| INO <sub>3</sub>               | 2.1D5·exp(8700D0·(1D0/T-1D0/298D0))                                                                   | -          | [1]  |
| ICl                            | 110D0·exp(5600D0·(1D0/T-1D0/298D0))                                                                   | -          | [1]  |
| IBr                            | 24D0·exp(5600D0·(1D0/T-1D0/298D0))                                                                    | -          | [1]  |
| O <sub>3</sub>                 | 1.13D-2·exp(7.72·(298D0/T-1D0))                                                                       | 1D-7       | [2]  |
| OH                             | 2.5D1·exp(22.21·(298D0/T-1D0))                                                                        | 1D-5       | [2]  |
| H <sub>2</sub> O <sub>2</sub>  | 9.1D2·101.325·exp(6600·(1D0/T-1D0/298D0))                                                             | 1D0        | [2]  |
| DMS                            | 0.56D0·exp(4480D0·(1D0/T-1D0/298D0))                                                                  | 1D-7       | [3]  |
| DMSO                           | 1D7·exp(2580D0·(1D0/T-1D0/298D0))                                                                     | 1D-5       | [3]  |
| DMSO <sub>2</sub>              | 1D7·exp(5390D0·(1D0/T-1D0/298D0))                                                                     | 1D-5       | [3]  |
| MSIA                           | 1.68D9·exp(1760D0·(1D0/T-1D0/298D0))                                                                  | 1D-5       | [C]  |
| HPMTF                          | 1.33D7                                                                                                | 1D-5       | [C]  |
| SO <sub>2</sub>                | 1.22D0*EXP(10.55*(298D0/TEMP-1D0))                                                                    | 1D-7       | [2]  |
| HO <sub>2</sub>                | 2D3*EXP(22.28*(298D0/TEMP-1D0))                                                                       | 1D-5       | [2]  |
| NO <sub>3</sub>                | 2.1D5*EXP(29.19*(298D0/TEMP-1D0))                                                                     | 1D-5       | [2]  |
| HCHO                           | 3.46D0*EXP(8.19*(298D0/TEMP-1D0))                                                                     | 1D-5       | [2]  |
| NO <sub>2</sub>                | 1D-2*EXP(8.38*(298D0/TEMP-1D0))                                                                       | 1D.7       | [2]  |
| O <sub>2</sub>                 | 1.3D-3                                                                                                | 1D-5       | [2]  |
| SO <sub>3</sub>                | 1D5                                                                                                   | 1D-5       | [A]  |
| NH <sub>3</sub>                | 57.6*EXP(13.79*(298./TEMP-1D0)<br>-5.39*(1D0+log(298./TEMP)-298./TEMP))                               | 1D0        | [2]  |
| HNO <sub>3</sub>               | 2.1D5·exp(8700.0·(1D0/T-1D0/298.15))                                                                  | 1D0        | [2]  |
| H <sub>2</sub> SO <sub>4</sub> | 1D0/(98D-3·exp(-11.695D0+10156D0·(1D0/360.15D0-1D0/T<br>+0.38D0/545D0·(1D0+log(360.15/T)-360.15/T)))) | 1D0        | [4]  |
| MSA                            | 1.13D11·exp(1760D0·(1D0/T-1D0/298D0))                                                                 | 1D0        | [C]  |

[1] Braeuer et al. (2013) ; [2] Jacobson (2005) ; [3] Hoffmann et al. (2016)

[4] Kulmala and Laaksonen (1990) ; [C] COSMOtherm with temperature dependence from Hoffmann et al. (2016); [A] Assumed

## S2 Model setup and additional results

### 5 S2.1 Chamber compaction and dilution due to instrument sampling

We simulated the gradual dilution of the smog chamber because of the instrument sampling and air entrainment from outside the chamber. The Teflon bag in AURA is mounted in a fixed metal frame. Based on the observations of the smog chamber we estimate that the chamber volume can be compressed from initially  $5 \text{ m}^3$  to a minimum volume of  $3 \text{ m}^3$  because of the instrument sampling. In the model we simulate the chamber volume compaction and gradually increasing air entrainment using a simplified parameterization which describe the fraction of the sampled air that result in a decreasing chamber volume:

$$10 \quad f_{\text{compaction}} = (V(t) - V_{\text{min}})/(V_0 - V_{\text{min}}) \quad (1)$$

( $V(t)$ ), ( $V_{\text{min}}$ ) and ( $V_0$ ) denote the chamber volume at time ( $t$ ), the estimated minimum chamber volume ( $3 \text{ m}^3$ ) in AURA and the initial chamber volume ( $5 \text{ m}^3$ ) respectively. The remaining fraction of the sampled air ( $1 - f_{\text{compaction}}$ ) was assumed to be particle free air mixed into the chamber from outside, which resulted in a gradual dilution of the species concentrations in the chamber.



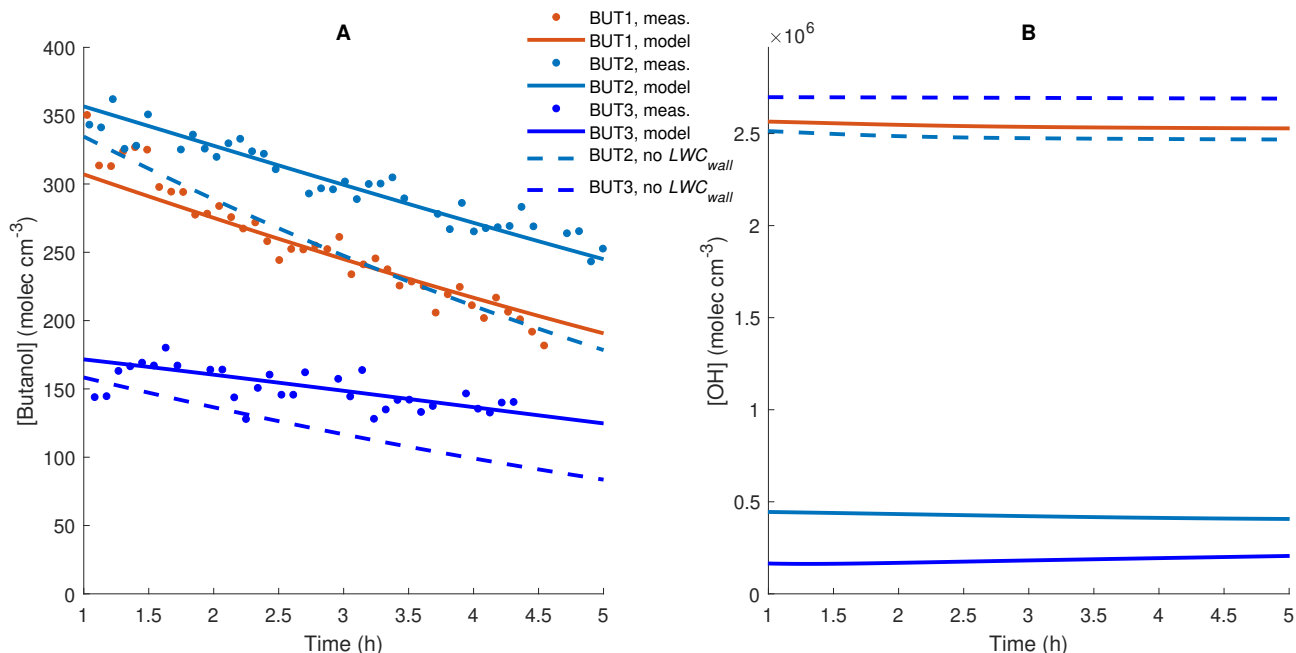

**Figure S1.** Model results and observations from three butanol experiments (BUT1-3). Panel **A**: Modelled and observed butanol concentrations. Panel **B**: Modelled OH concentration. BUT1: 293 K, RH  $\sim$  5 %; BUT2: 293 K, RH 50-60 %; BUT3: 273 K, RH 70-80 %. The dashed lines show the model results from simulations without a liquid water film on the chamber walls.

## S2.2 Estimated wall liquid water content based on Butanol experiments

- 15 Fig. S1 shows the modelled and observed butanol decay and modelled OH concentrations during three different butanol experiments. In order to capture the observed butanol decay during humid experiments BUT2 and BUT3 we had to introduce a liquid water film corresponding to an effective liquid water content (LWC) of  $\sim 30 \text{ g/m}^3$  and  $\sim 500 \text{ g/m}^3$  on the chamber walls respectively. The LWC on the walls allow the highly water soluble  $\text{H}_2\text{O}_2$ , which serve as the main OH source, to be taken up efficiently on the chamber walls. The observed and modelled butanol loss rates are governed both by the chamber dilution and the OH oxidation. In the humid experiments (BUT2-3) the dilution is larger than in the dry experiment (BUT1) because of an inflow of 2 L/min of humidified
- 20 air. In the dry experiment (BUT1) there is some indication that the butanol decay is slightly faster in the observations than in the model. This could possibly be a result of underestimated OH recycling in the MCMv3.3.1 butanol chemistry. When the model is run without any butanol the modelled OH concentration become  $\sim 10$  % larger. However, it may also be due to slightly underestimated chamber dilution in the model.

### S2.3 COSMOtherm calculations

25 We followed recommendations by Kurtén et al. (2018) in selecting conformers containing no intramolecular H-bonds as input for the COSMOtherm calculations. This method has shown to give more accurate saturation vapour pressure estimates of multifunctional compounds that are able to form intramolecular H-bonds (Kurtén et al., 2018). The input files were computed at the BP/def2-TZVPD-FINE//BP/def-TZVP level of theory using the COSMOconf and TURBOMOLE programs (COSMOconf, 2013; TURBOMOLE, 2010).

Henry’s law coefficients were calculated using COSMOtherm-estimated saturation vapour pressure of the pure compound  $i$  ( $p_{\text{sat}}$ ) and activity coefficient of compound  $i$  at infinite dilution in water ( $\gamma_i^w$ , with respect to pure compound reference state):

$$30 \quad H_i^{cp} = \frac{1}{M_w \times p_{\text{sat},i} \times \gamma_i^w} \quad (2)$$

This approach assumes low aqueous solubility for the compounds ( $x_{\text{sol},i}^w = 1/\gamma_i^w$ ), which means that the molar mass of the solution can be approximated using the molar mass of the solvent water ( $M_w$ ). Table S3 shows the COSMOtherm-estimated saturation vapour pressures and aqueous activity coefficients, as well as Henry’s law coefficients calculated using the COSMOtherm estimates.

**Table S3.** COSMOtherm-estimated saturation vapour pressures, pKa and aqueous activity coefficients at 298.15 K, and Henry’s law coefficients calculated from the two COSMOtherm estimates.

|               | $p_{\text{sat}}$ [atm] | $\gamma^w$            | $H^{cp}$ [mol atm <sup>-1</sup> kg <sup>-1</sup> ] | pKa   |
|---------------|------------------------|-----------------------|----------------------------------------------------|-------|
| HPMTF-hydrate | $2.49 \times 10^{-7}$  | $2.80 \times 10^{-1}$ | $7.96 \times 10^8$                                 | 10.46 |
| HPMTF         | $2.37 \times 10^{-4}$  | $1.76 \times 10^1$    | $1.33 \times 10^4$                                 | 10.30 |
| MSA           | $4.16 \times 10^{-7}$  | 1.18                  | $1.13 \times 10^8$                                 | -2.93 |
| MSIA          | $1.51 \times 10^{-5}$  | 2.18                  | $1.69 \times 10^6$                                 | 2.62  |

## S2.4 Sensitivity runs with variable wall liquid water content

35 To constrain the effect of different liquid water content on the chamber walls ( $LWC_{wall}$ ), for the secondary aerosol formation from DMS, we performed several model sensitivity tests. Fig S2-S4 summarises the results from one dry experiment (DMS2) and the two humid experiments DMS6 and DMS7.

When the  $LWC_{wall}$  is lowered with one order of magnitude compared to the default model setup ( $LWC_{wall} = 10^{-5} \text{ gm}^{-3}$ ), for the dry experiment, the ammonia gas-phase concentration increases. This results in higher new particle formation (NPF) and total particle number concentration. The lower  $w_{all}$  also prevent the uptake and oxidation of MSIA on the chamber walls, and thereby increases the formation of MSA and SA in the gas-phase and the secondary

40 SA and MSA particle mass (PM) formation (Fig. S2B). The opposite effect is seen when the  $LWC_{wall}$  is increased compared to the default model setup.

For the humid experiments the  $LWC_{wall}$  serve as an efficient sink for the  $\text{H}_2\text{O}_2(\text{g})$  which results in substantially lower  $\text{HO}_2(\text{g})$  concentrations compared to the dry experiments. This promote the SA formation via thermal decomposition of  $\text{CH}_3\text{SO}_3$  in front of the MSA production via  $\text{CH}_3\text{SO}_3 + \text{HO}_2$ . Thus, lowering the  $LWC_{wall}$  with one order of magnitude compared to the default model setup for experiment DMS6 result in lower SA and decreasing NPF (Fig. S3A), despite that the  $\text{NH}_3(\text{g})$  concentration increases. This also results in overestimated MSA PM formation and underestimated  $\text{SO}_4$  PM formation

45 (Fig. S3B). When the  $LWC_{wall}$  instead is increased with one order of magnitude compared to the default setup, the model underestimates the MSA PM and overestimates the  $\text{SO}_4$  PM in the end of the model simulation (Fig. S3B). Increasing  $LWC_{wall}$  also results in lower particle number concentrations. This time it is the  $\text{NH}_3(\text{g})$  concentration which become the limiting factor for the NPF. Fig. S3 shows the model results from a simulation with  $LWC_{wall} = 30 \text{ gm}^{-3}$ , i.e. the same  $LWC_{wall}$  as was estimated from the humid butanol experiment BUT2. With this  $LWC_{wall}$  value the modelled particle number concentration and  $\text{SO}_4$  PM are in close agreement with the observations, however the model underestimate the PM MSA with 20-30 %.

50 The increasing particle mass formation in the end of the simulations in experiment DMS6 is governed by the gradually increasing inflow of  $\text{NH}_3(\text{g})$  rich air from outside the chamber, which result in a second weaker NPF event. The modelled PM mass increase is mainly a result of that the non-charged newly formed particles are less efficiently lost to the walls than the aged charged particles, and that the NPF increases the particle condensation sink. This tendency of increasing PM in the end of the experiment is not seen in the observations, which may indicate that the model overestimate the leakage of  $\text{NH}_3(\text{g})$  into the chamber during the end of this experiment.

55 For the humid and cold experiment DMS7 the modelled particle number concentration and  $\text{SO}_4$  PM are relatively insensitive to different  $LWC_{wall}$  values (Fig. S4). However, the model strongly overestimates the MSA PM if we use the same  $LWC_{wall}$  as for the default DMS6 model setup, i.e.  $LWC_{wall} \geq 10 \text{ gm}^{-3}$ . The closest agreement between the modelled and measured MSA is found when the  $LWC_{wall} \geq 500 \text{ gm}^{-3}$ , i.e. similar  $LWC_{wall}$  as was estimated from the humid and cold butanol experiment BUT3 (Fig. S1).

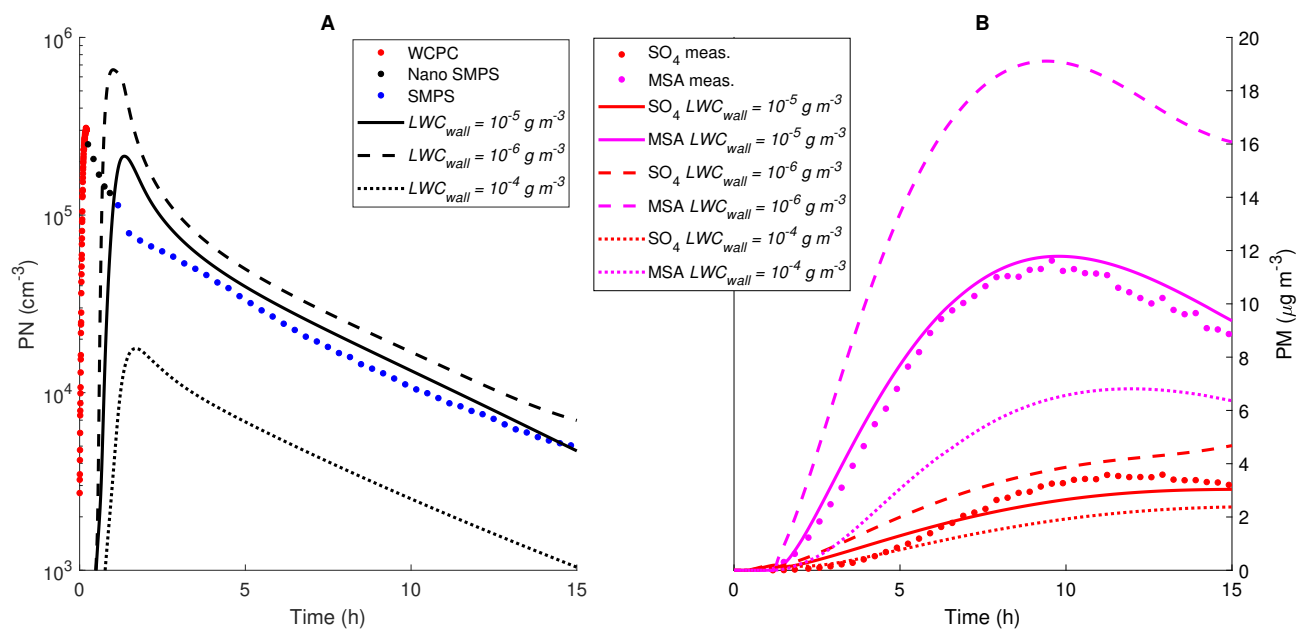

**Figure S2.** Modelled and measured particle number concentration (panel **A**) and particle MSA and  $\text{SO}_4$  mass concentrations (panel **B**) for the dry chamber experiment DMS2. The model results are from different sensitivity runs with different LWC on the chamber walls.

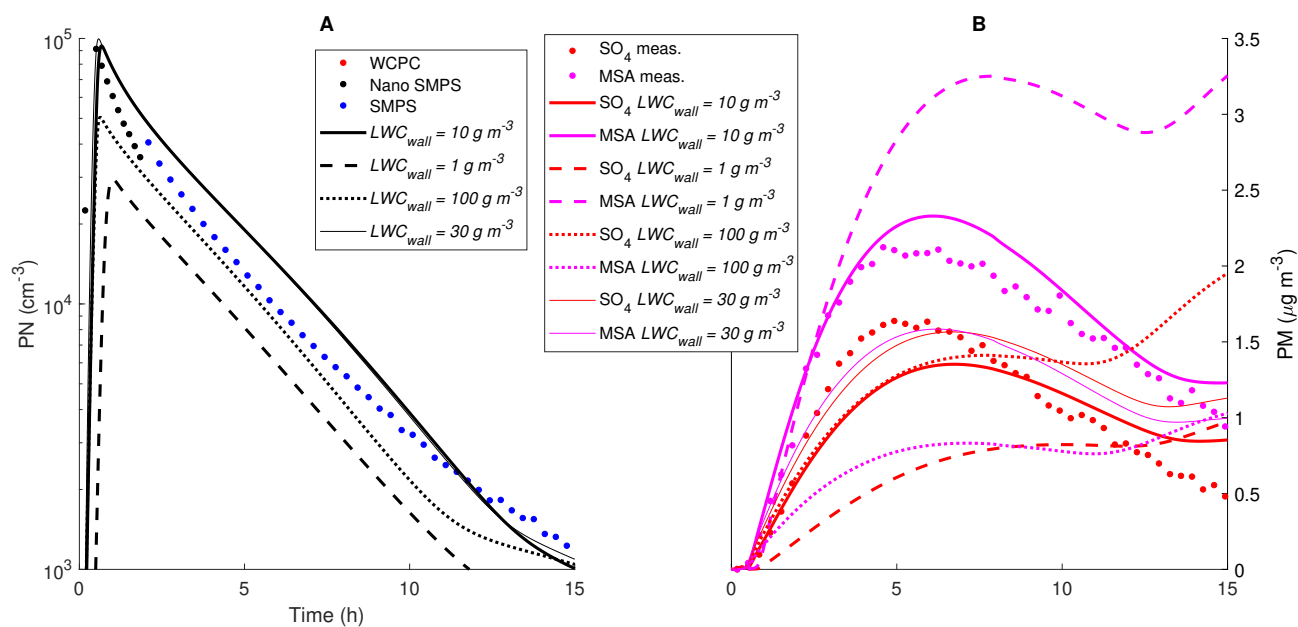

**Figure S3.** Modelled and measured particle number concentration (panel **A**) and particle MSA and  $\text{SO}_4$  mass concentrations (panel **B**) for the humid chamber experiment DMS6. The model results are from different sensitivity runs with different LWC on the chamber walls.

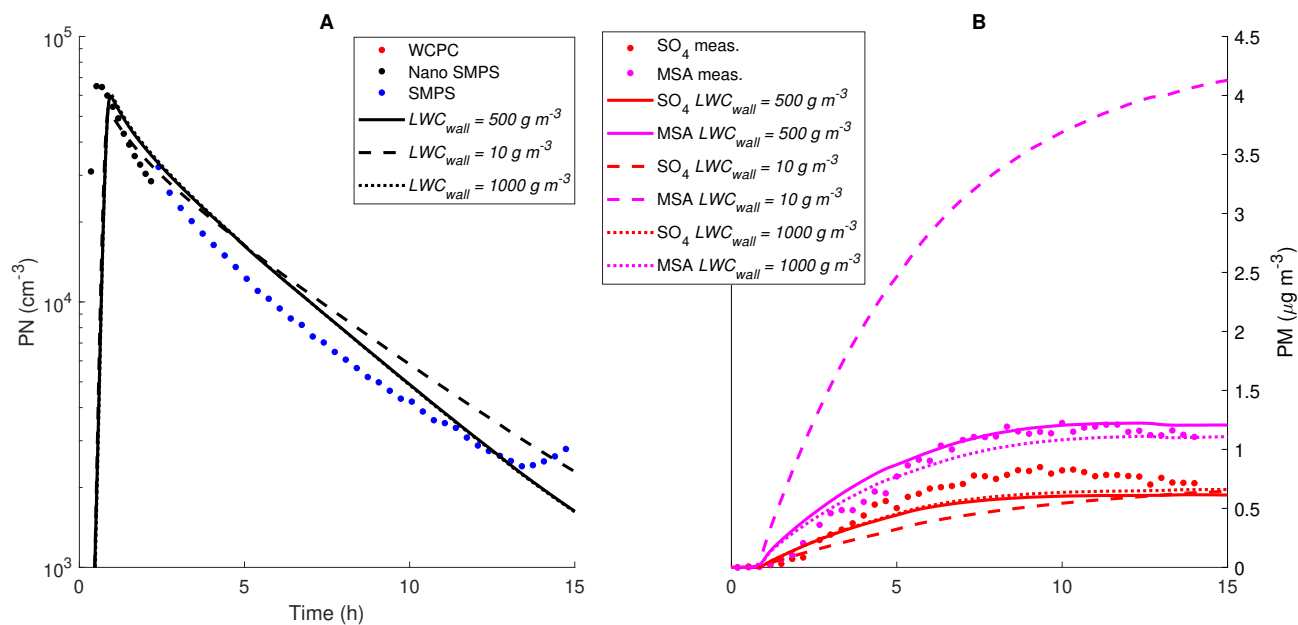

**Figure S4.** Modelled and measured particle number concentration (panel **A**) and particle MSA and  $\text{SO}_4$  mass concentrations (panel **B**) for the humid and cold chamber experiment DMS7. The model results are from different sensitivity runs with different LWC on the chamber walls.

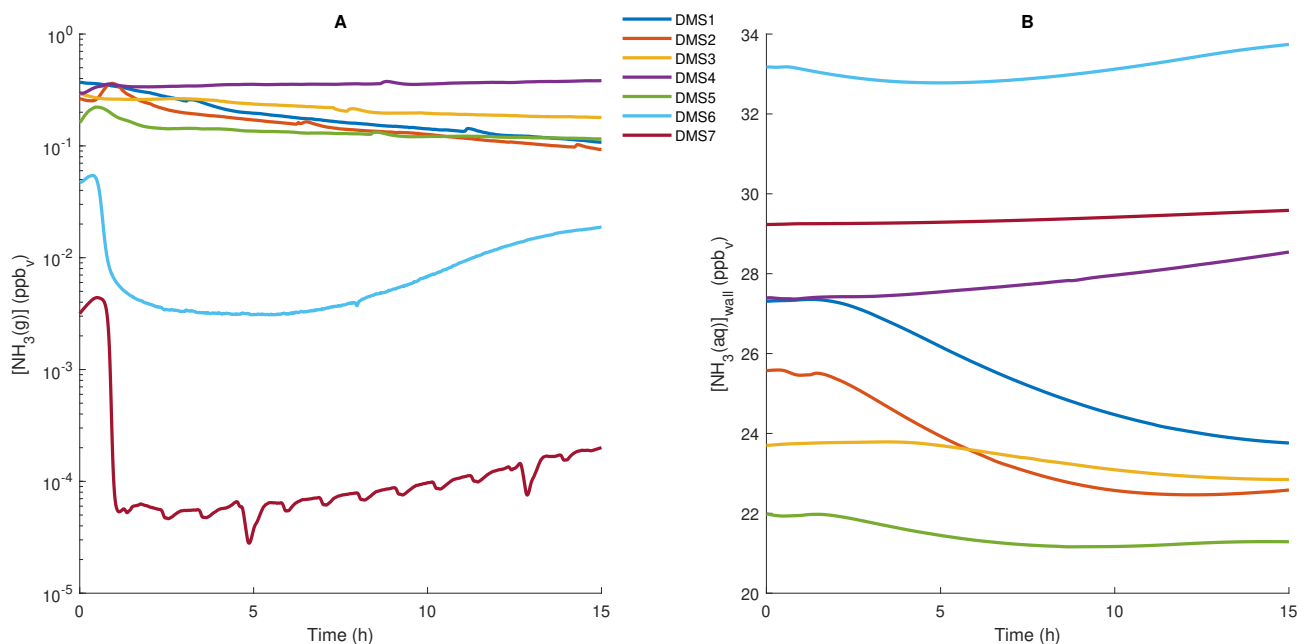

**Figure S5.** Modelled  $\text{NH}_3$  concentration in the gas-phase (panel **A**) and on the chamber walls (panel **B**) for all base case model simulations of experiments DMS1-7.

## S2.5 Modelled $\text{NH}_3$ concentrations

- 60 Figure S5 shows the modelled  $\text{NH}_3$  concentration in the gas-phase (Fig. S5A) and on the walls (Fig. S5B) for all simulated DMS experiments. The  $\text{NH}_3(\text{g})$  concentration is governed by the loss of  $\text{NH}_3(\text{g})$  to the aerosol particle phase, the acidity of the wall liquid water and the leakage of  $\text{NH}_3(\text{g})$  into the chamber. In experiment DMS1, DMS2, DMS3 and DMS5 the aerosol particle condensation sink term is greater than the inflow of  $\text{NH}_3(\text{g})$  into the chamber which result in gradually decreasing  $\text{NH}_3$  concentration both in the gas-phase and on the chamber walls. In DMS5, the experiment with lowest DMS concentration, the particle condensation sink of  $\text{NH}_3(\text{g})$  is always smaller than the inflow of  $\text{NH}_3(\text{g})$ , which result in gradually increasing  $\text{NH}_3$  concentrations in the gas-phase and on the walls. In the humid experiments DMS6 and DMS7 the condensation sink term dominates over the influx of  $\text{NH}_3$  during the onset of the NPF in the chamber, while during the end of the experiments the inflow of  $\text{NH}_3(\text{g})$  gradually increases the  $\text{NH}_3$  concentration in the gas-phase and on the walls. The very low  $\text{NH}_3(\text{g})$  concentration in DMS7 compared to the other experiments is a result of the thick liquid water film on the walls and the low temperature. The ripples in the modelled  $\text{NH}_3(\text{g})$  concentrations, mainly observed in DMS7, is caused by small temperature fluctuations of  $\pm 1$  K.
- 65

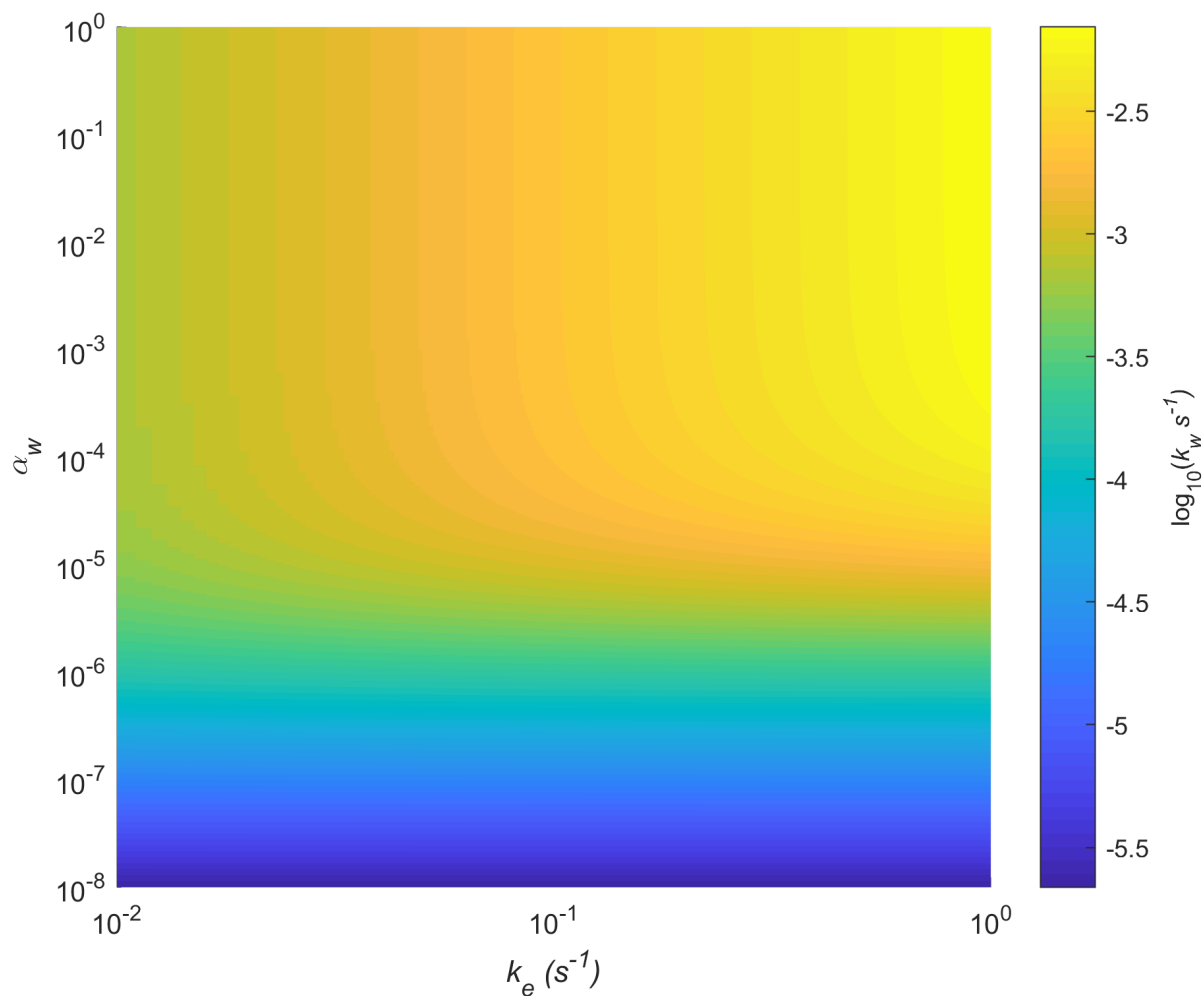

**Figure S6.** First order gas wall losses in a 5 m<sup>3</sup> smog chamber with a surface areas to volume ratio corresponding to a completely inflated AURA smog chamber. The wall loss rates were calculated with theory proposed by McMurry and Grosjean (1985) for a molecule with a diffusion coefficient ( $D$ ) = 10<sup>-5</sup> m<sup>2</sup>s<sup>-1</sup> and wall mass accommodation coefficients in the range 10<sup>-8</sup> to 1.0

## S2.6 Wall loss rates of gases

- 70 Figure S6 shows how the first order gas wall loss rates ( $k_w$ ) varies as a function of the coefficient of eddy diffusion ( $k_e$ ) and the wall mass accommodation  $\alpha_w$ . The wall loss rates were derived with the theory proposed by McMurry and Grosjean (1985) (Eq. 1). For the AURA model simulations performed in this work we used a relatively low ( $k_e$ ) of 0.02 s<sup>-1</sup> motivated by a previous AURA smog chamber study which estimated first order wall losses of highly oxygenated organic molecules (HOM) (Quéléver et al., 2019).



## S2.6.1 Sensitivity runs with variable O<sub>3</sub> wall uptake

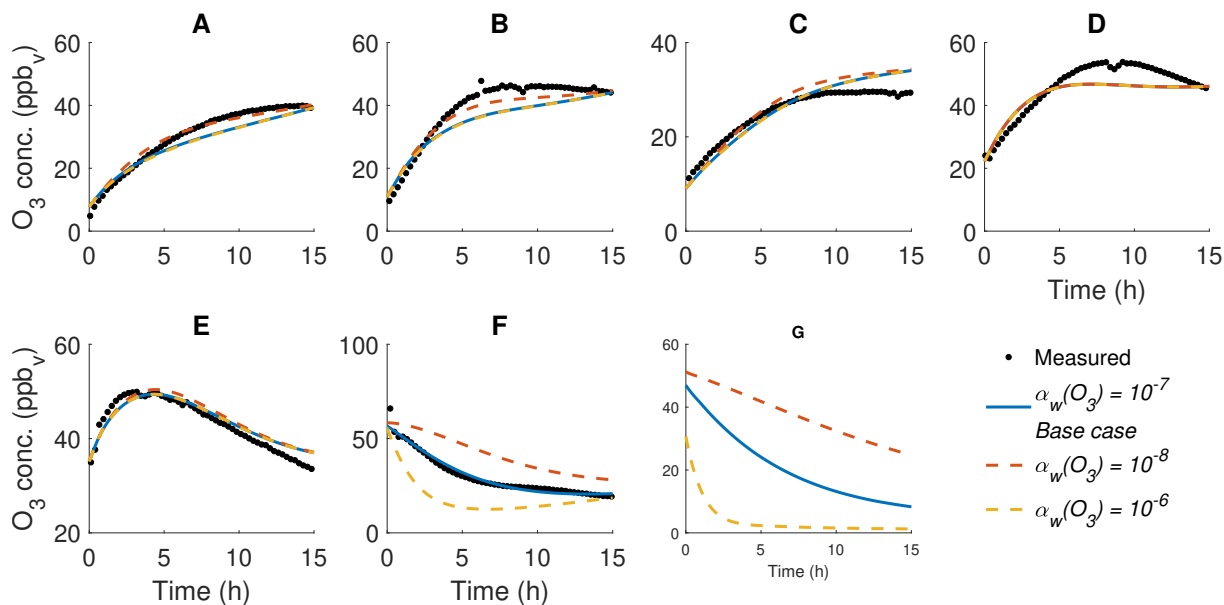

**Figure S7.** Measured and modelled O<sub>3</sub> concentration for different O<sub>3</sub>  $\alpha_w$ . Panel A-G shows results from experiments DMS1-7.

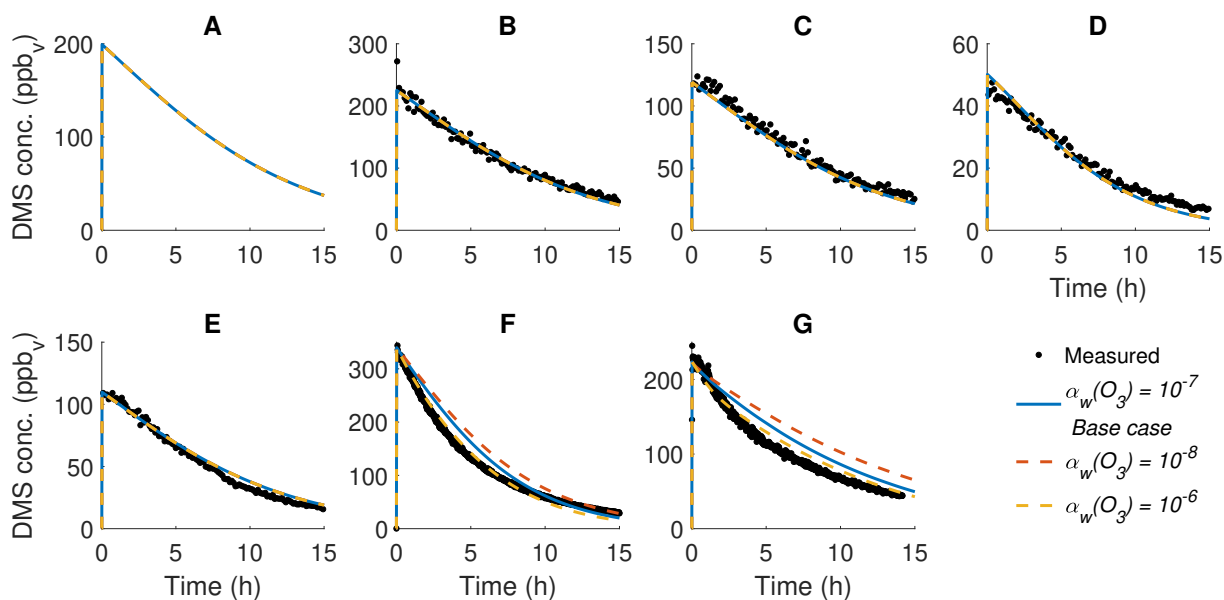

**Figure S8.** Measured and modelled DMS concentration for different O<sub>3</sub>  $\alpha_w$ . Panel A-G shows results from experiments DMS1-7.

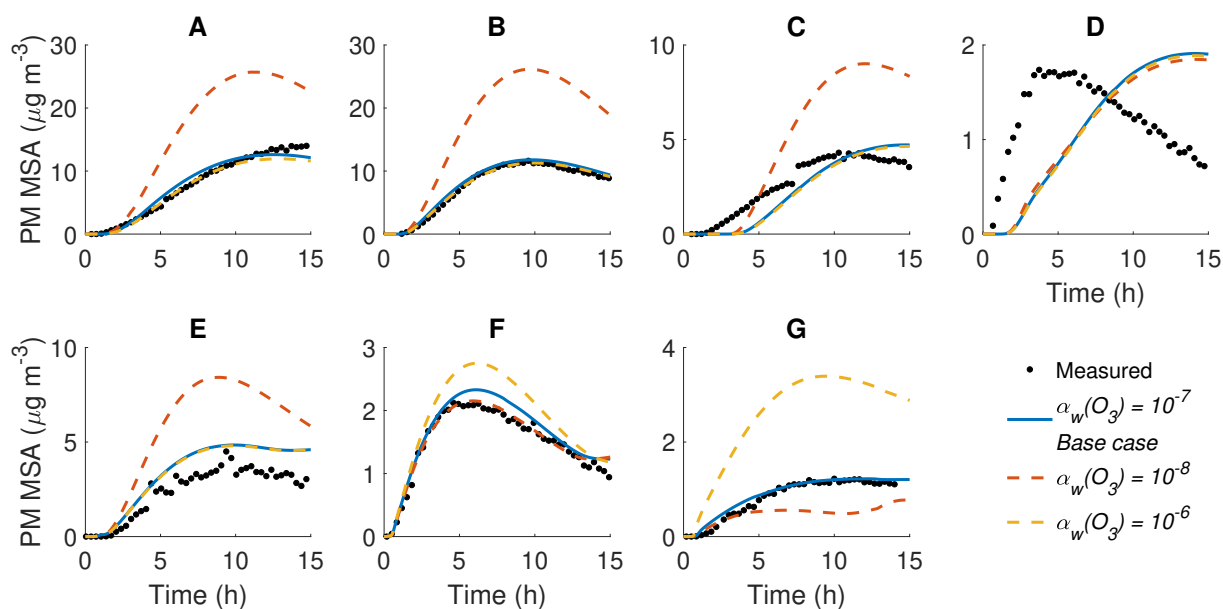

**Figure S9.** Measured and modelled MSA PM for different  $O_3$   $\alpha_w$ . Panel A-G shows results from experiments DMS1-7.

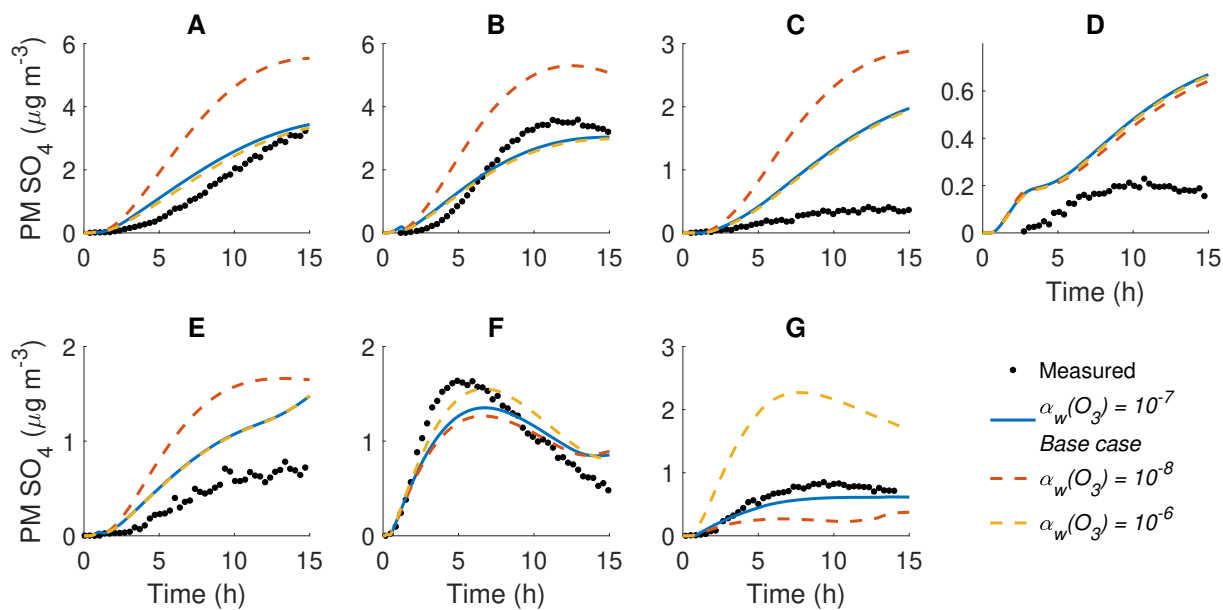

**Figure S10.** Measured and modelled  $SO_4$  PM for different  $O_3$   $\alpha_w$ . Panel A-G shows results from experiments DMS1-7.

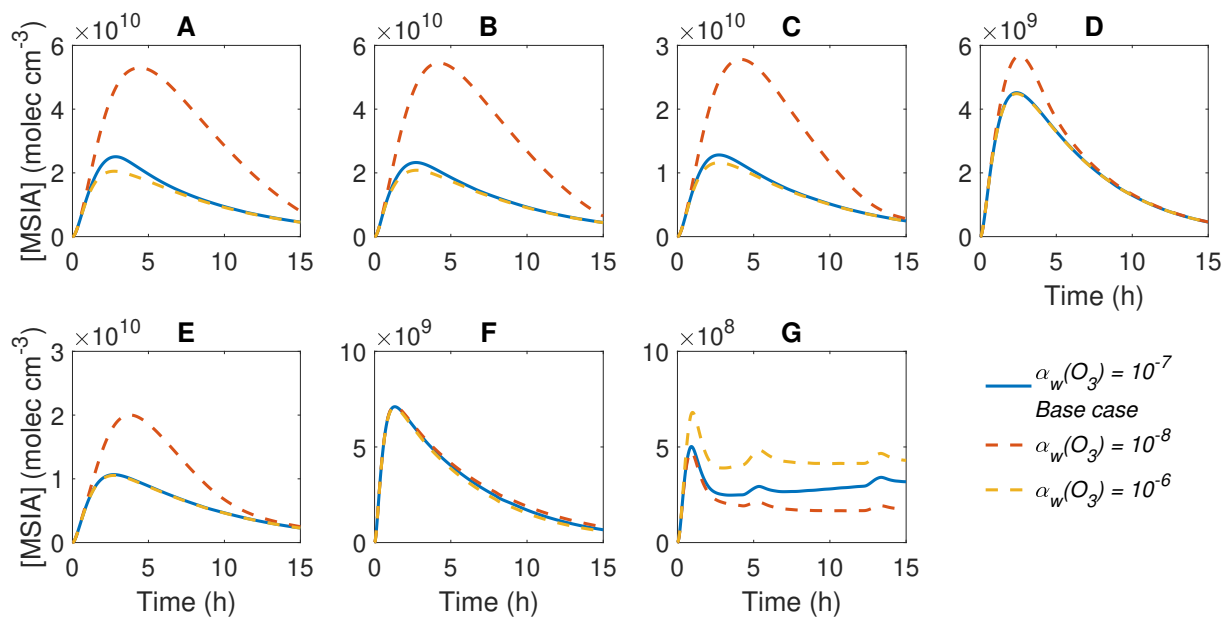

**Figure S11.** Modelled MSIA concentration for different  $\text{O}_3$   $\alpha_w$ . Panel A-G shows results from experiments DMS1-7.

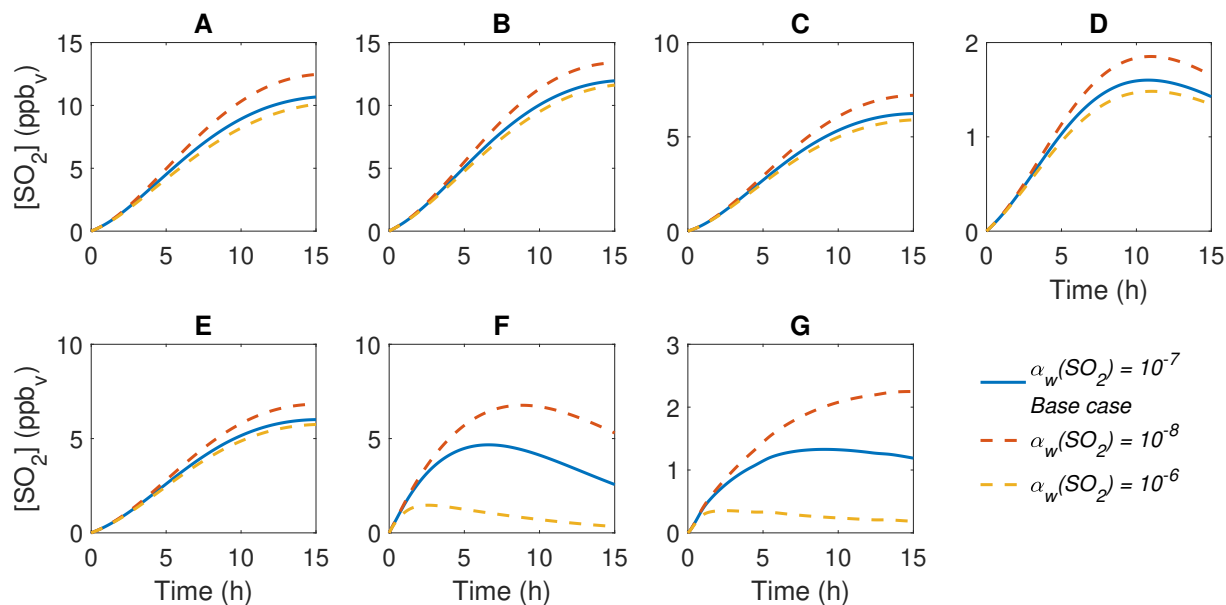

**Figure S12.** Modelled SO<sub>2</sub> concentration for different SO<sub>2</sub>  $\alpha_w$ . Panel A-G shows results from experiments DMS1-7.

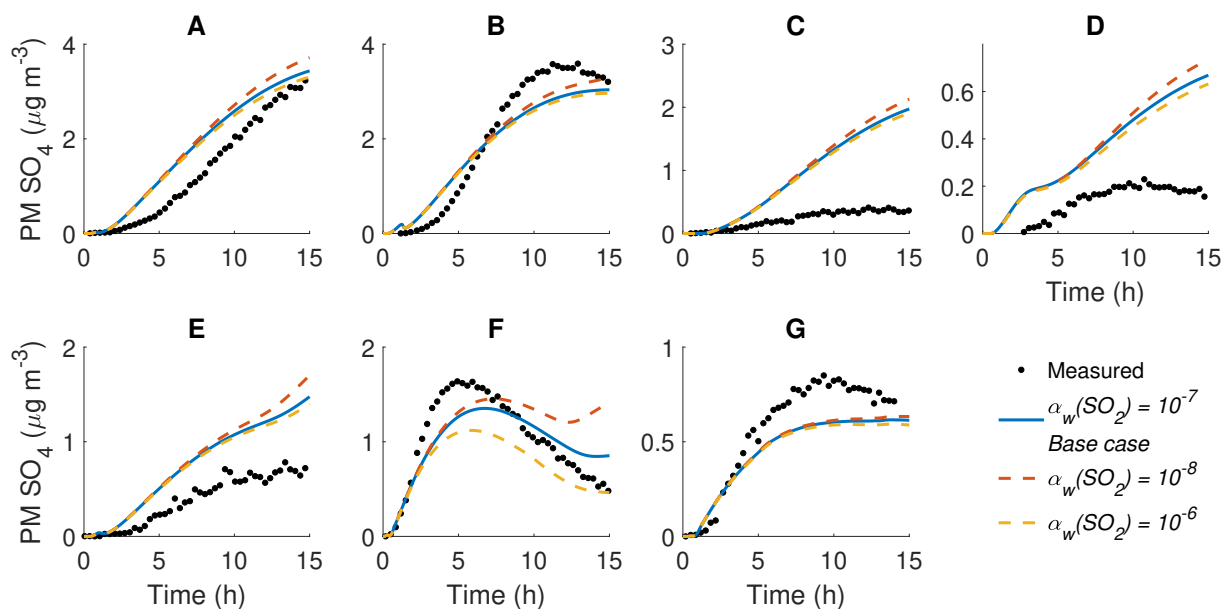

**Figure S13.** Measured and modelled SO<sub>4</sub> PM for different SO<sub>2</sub>  $\alpha_w$ . Panel A-G shows results from experiments DMS1-7.

### S2.6.3 Sensitivity runs with variable DMS wall uptake

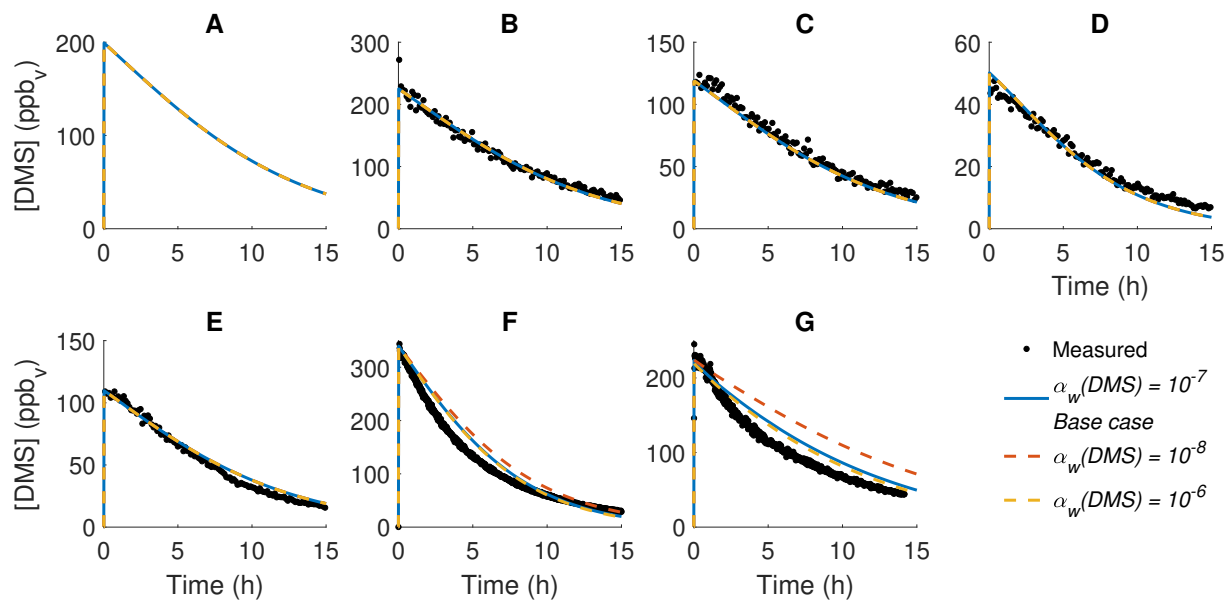

**Figure S14.** Measured and modelled DMS concentration for different DMS  $\alpha_w$ . Panel A-G shows results from experiments DMS1-7.

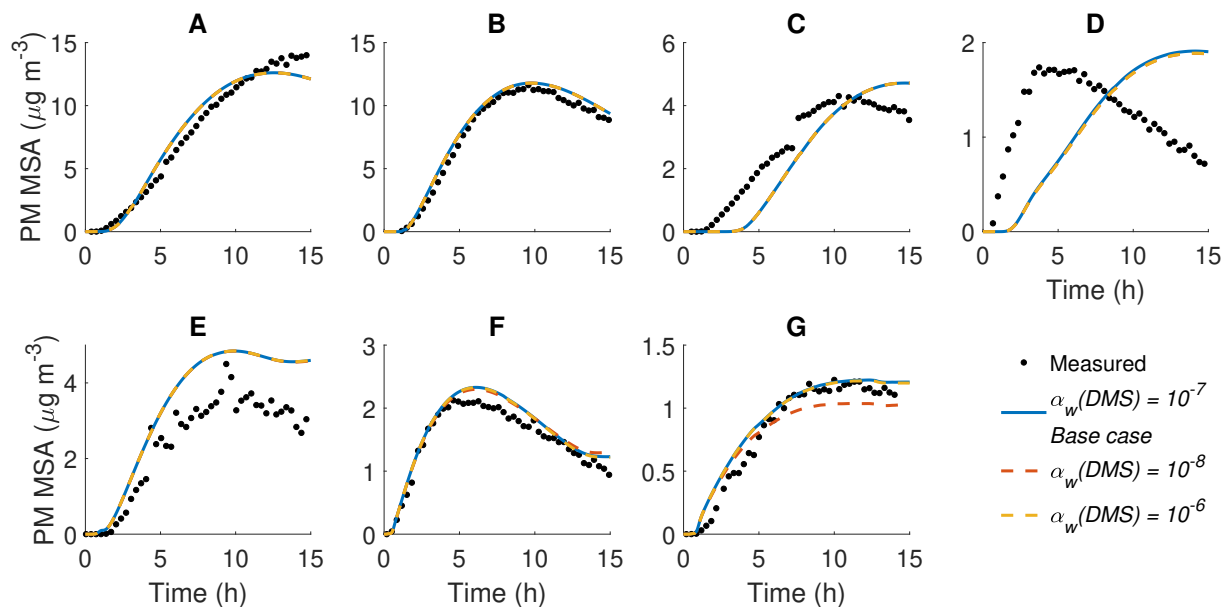

**Figure S15.** Measured and modelled MSA PM for different DMS  $\alpha_w$ . Panel A-G shows results from experiments DMS1-7.

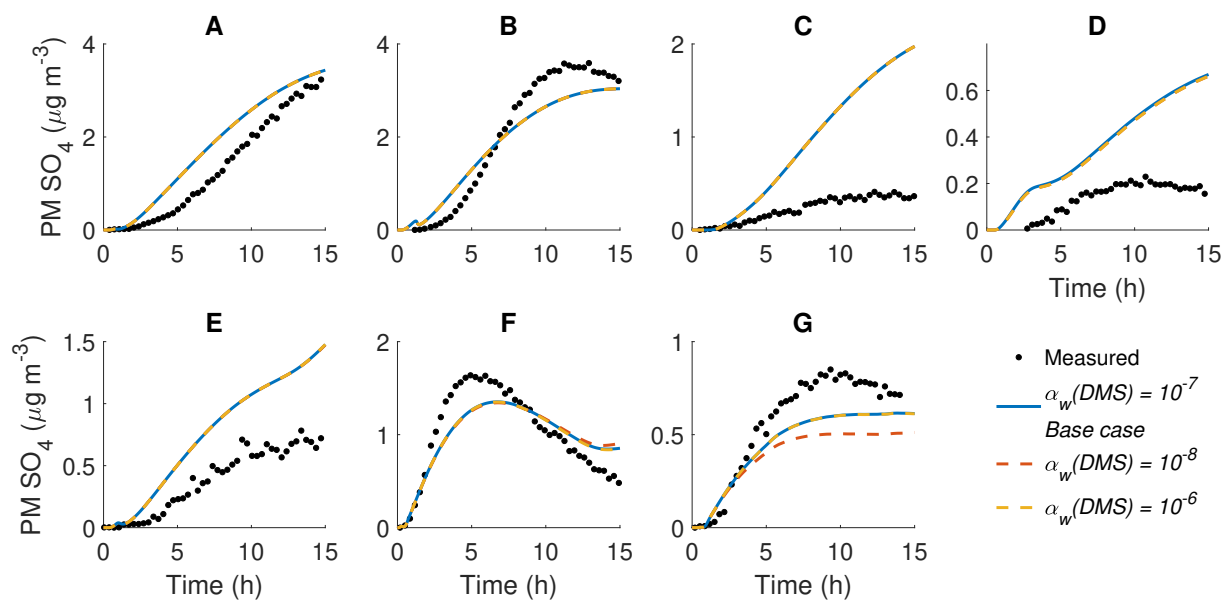

**Figure S16.** Measured and modelled SO<sub>4</sub> PM for different DMS  $\alpha_w$ . Panel A-G shows results from experiments DMS1-7.

### S2.6.4 Sensitivity runs with variable DMSO, DMSO<sub>2</sub>, MSIA and HPMTF wall uptake

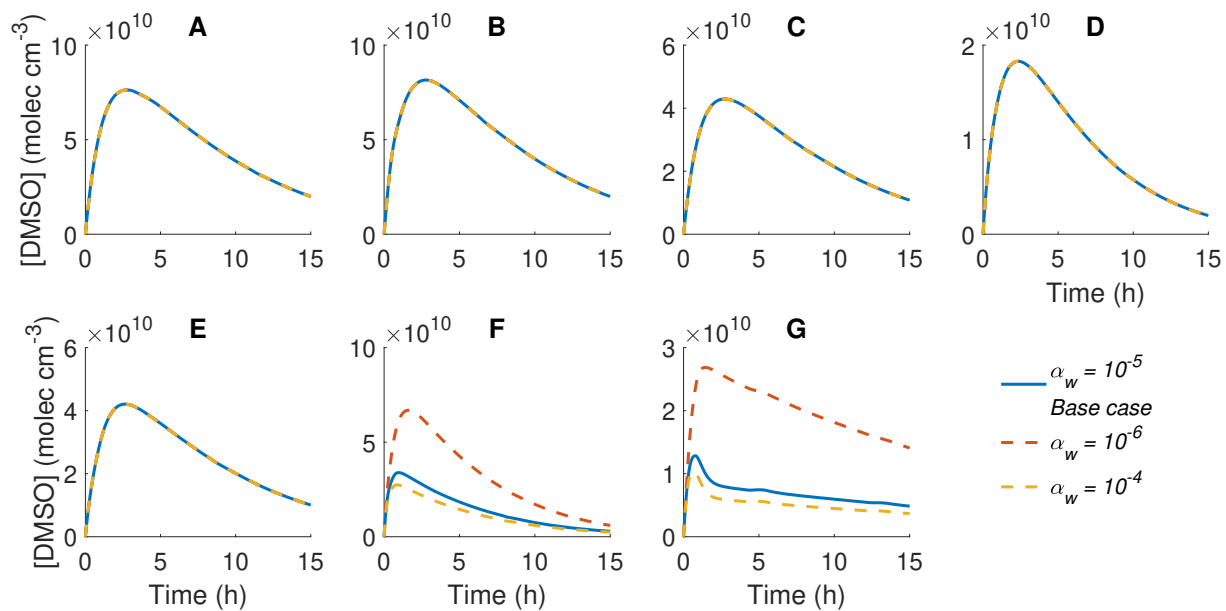

**Figure S17.** Modelled DMSO concentration for different  $\alpha_w$  for the intermediate DMS oxidation products DMSO, DMSO<sub>2</sub>, MSIA and HPMTF. Panel A-G shows results from experiments DMS1-7.

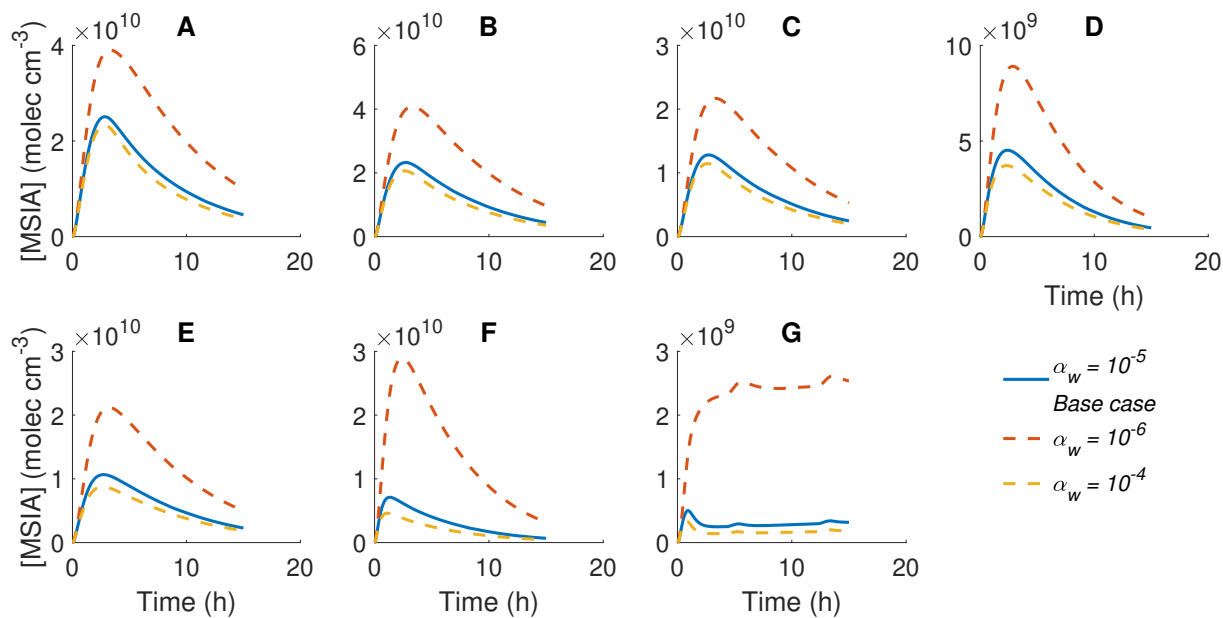

**Figure S18.** Modelled MSIA concentration for different  $\alpha_w$  for the intermediate DMS oxidation products DMSO, DMSO<sub>2</sub>, MSIA and HPMTF. Panel A-G shows results from experiments DMS1-7.

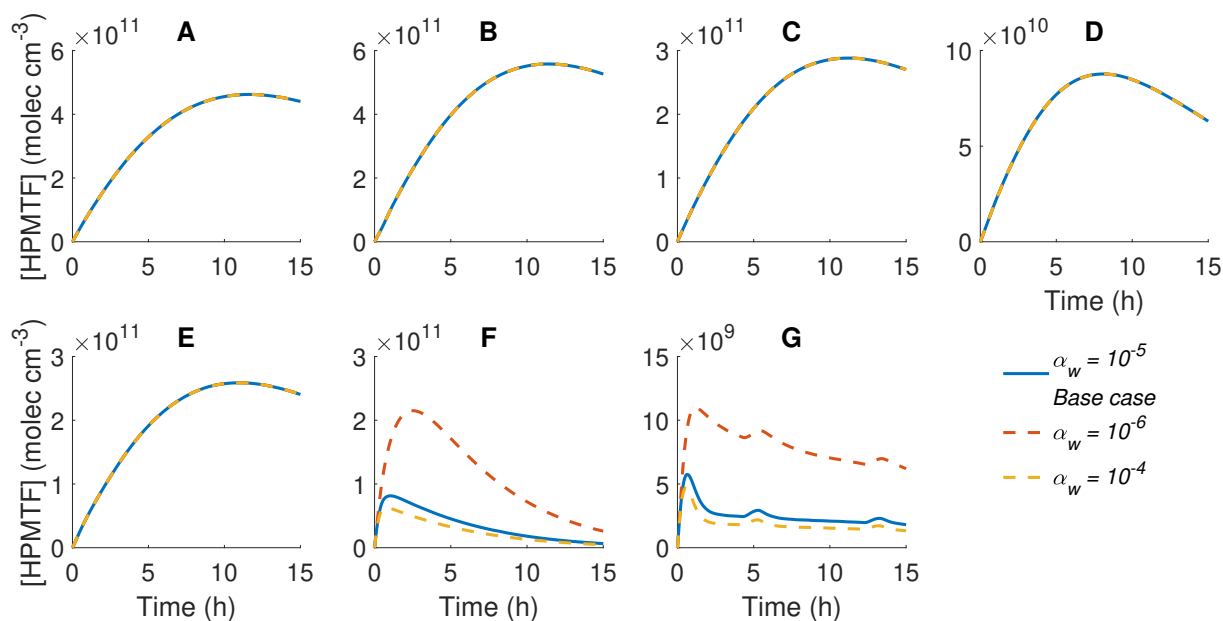

**Figure S19.** Modelled HPMTF concentration for different  $\alpha_w$  for the intermediate DMS oxidation products DMSO, DMSO<sub>2</sub>, MSIA and HPMTF. Panel A-G shows results from experiments DMS1-7.



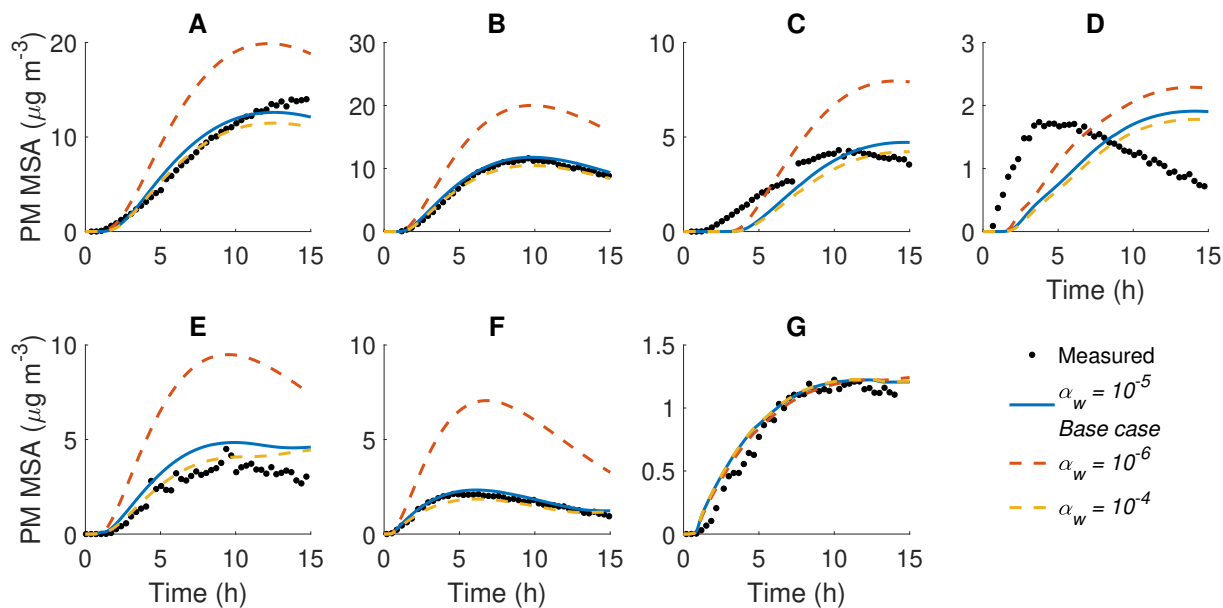

**Figure S20.** Measured and modelled MSA PM for different  $\alpha_w$  for the intermediate DMS oxidation products DMSO, DMSO<sub>2</sub>, MSIA and HPMTF. Panel A-G shows results from experiments DMS1-7.

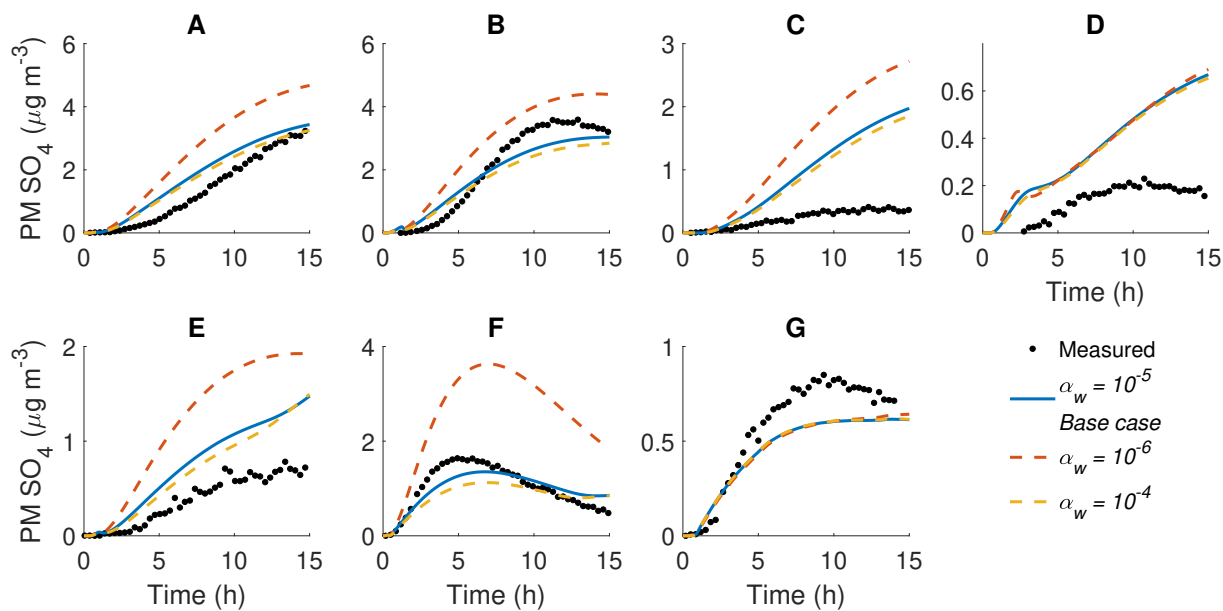

**Figure S21.** Measured and modelled SO<sub>4</sub> PM for different  $\alpha_w$  for the intermediate DMS oxidation products DMSO, DMSO<sub>2</sub>, MSIA and HPMTF. Panel A-G shows results from experiments DMS1-7.

## S2.7 Gas partitioning between the gas-phase and liquid film on the chamber walls

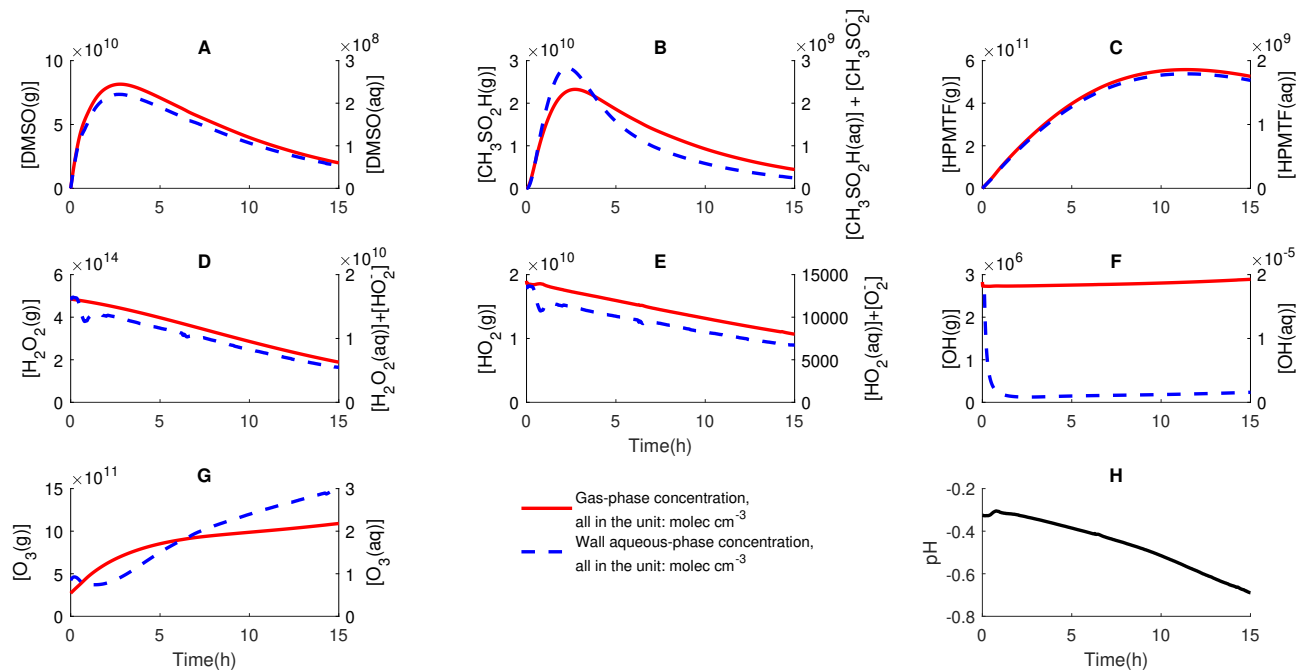

**Figure S22.** Modelled concentrations of the DMS oxidation products DMSO, MSIA ( $\text{CH}_3\text{SO}_2\text{H}$ ) and HPMTF (panel A-C), and oxidation agents  $\text{H}_2\text{O}_2$ ,  $\text{HO}_2$ ,  $\text{OH}$  and  $\text{O}_3$  (panel D-G) in the gas-phase (left y-axis) and in the chamber wall liquid water film ( $LWC_{wall}$ ) (right y-axis) for the dry experiment DMS2. Panel H shows the modelled pH (acidity) in the liquid water film. All concentrations are given in molecules/ $(\text{cm}^3 \text{air})$ .

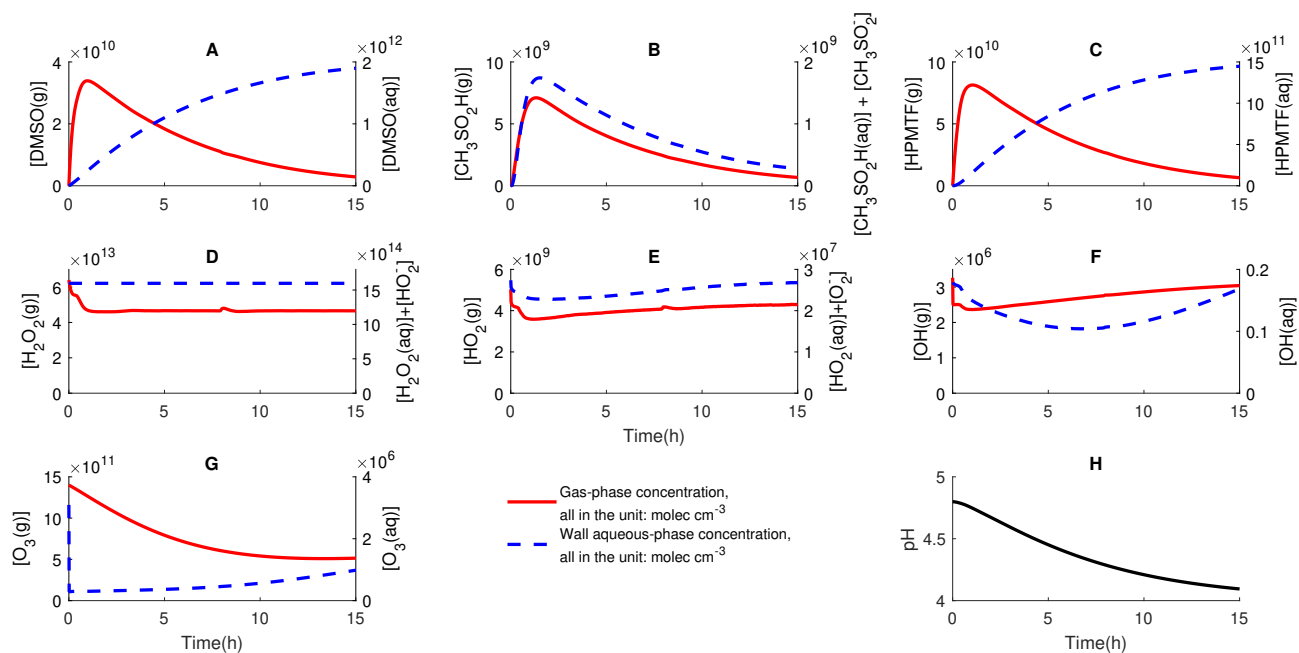

**Figure S23.** Modelled concentrations of the DMS oxidation products DMSO, MSIA ( $\text{CH}_3\text{SO}_2\text{H}$ ) and HPMTF (panel A-C), and oxidation agents  $\text{H}_2\text{O}_2$ ,  $\text{HO}_2$ ,  $\text{OH}$  and  $\text{O}_3$  (panel D-G) in the gas-phase (left y-axis) and in the chamber wall liquid water film ( $LWC_{wall}$ ) (right y-axis) for the humid experiment DMS6. Panel H shows the modelled pH (acidity) in the liquid water film. All concentrations are given in molecules/ $(\text{cm}^3 \text{air})$ .

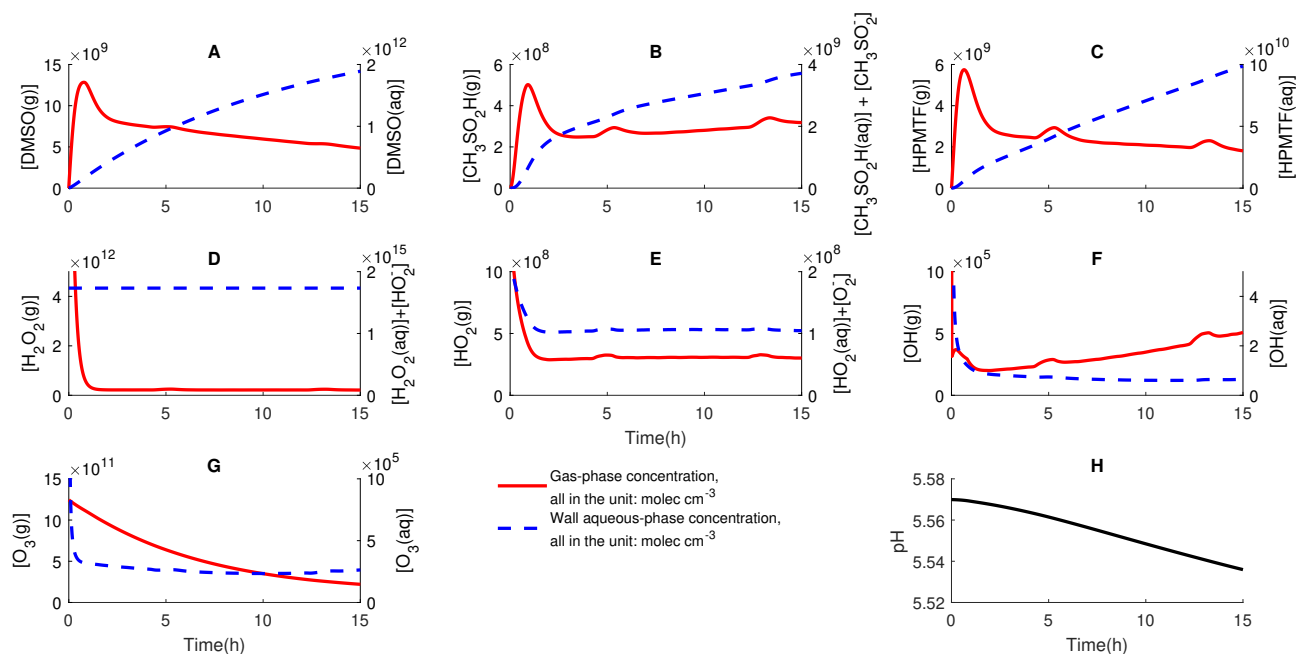

**Figure S24.** Modelled concentrations of the DMS oxidation products DMSO, MSIA ( $\text{CH}_3\text{SO}_2\text{H}$ ) and HPMTF (panel A-C), and oxidation agents  $\text{H}_2\text{O}_2$ ,  $\text{HO}_2$ ,  $\text{OH}$  and  $\text{O}_3$  (panel D-G) in the gas-phase (left y-axis) and in the chamber wall liquid water film ( $LWC_{wall}$ ) (right y-axis) for the humid and cold experiment DMS7. Panel H shows the modelled pH (acidity) in the liquid water film. All concentrations are given in molecules/( $\text{cm}^3$  air).

## S2.8 Wall loss for particles

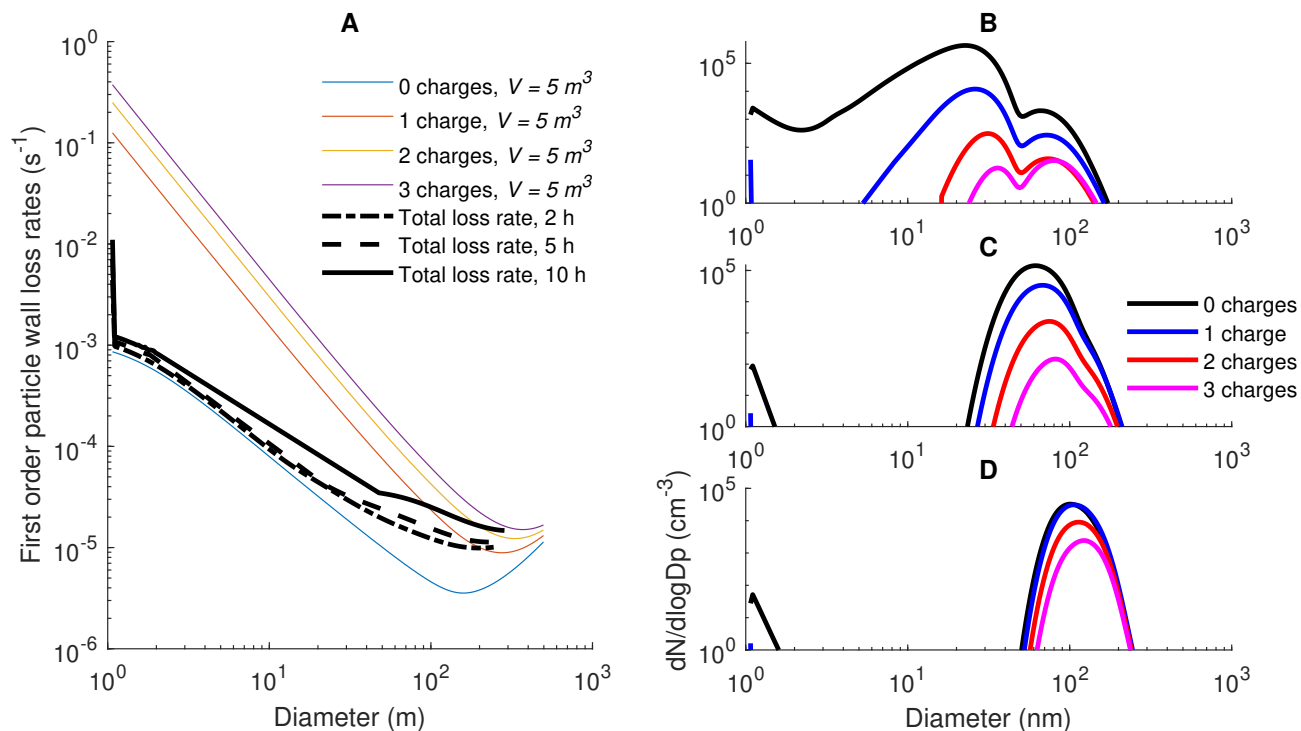

**Figure S25.** Example of modelled particle wall loss rates (panel **A**) and particle charge distributions after 2, 5 and 10 hours (panel **B**, **C** and **D**) for exp. DMS2. The modelled effective total particle wall loss rates take into account the fraction of particles with different number of elemental charges in each size bin. The high effective wall loss rate at the smallest particle size is a result of the relatively large fraction of charged molecules clusters that form new particles in the model. However, these particles are rapidly lost to the chamber walls and almost all nucleation mode aerosol particles above this size are non-charged.

## S3.1 Chamber experiments

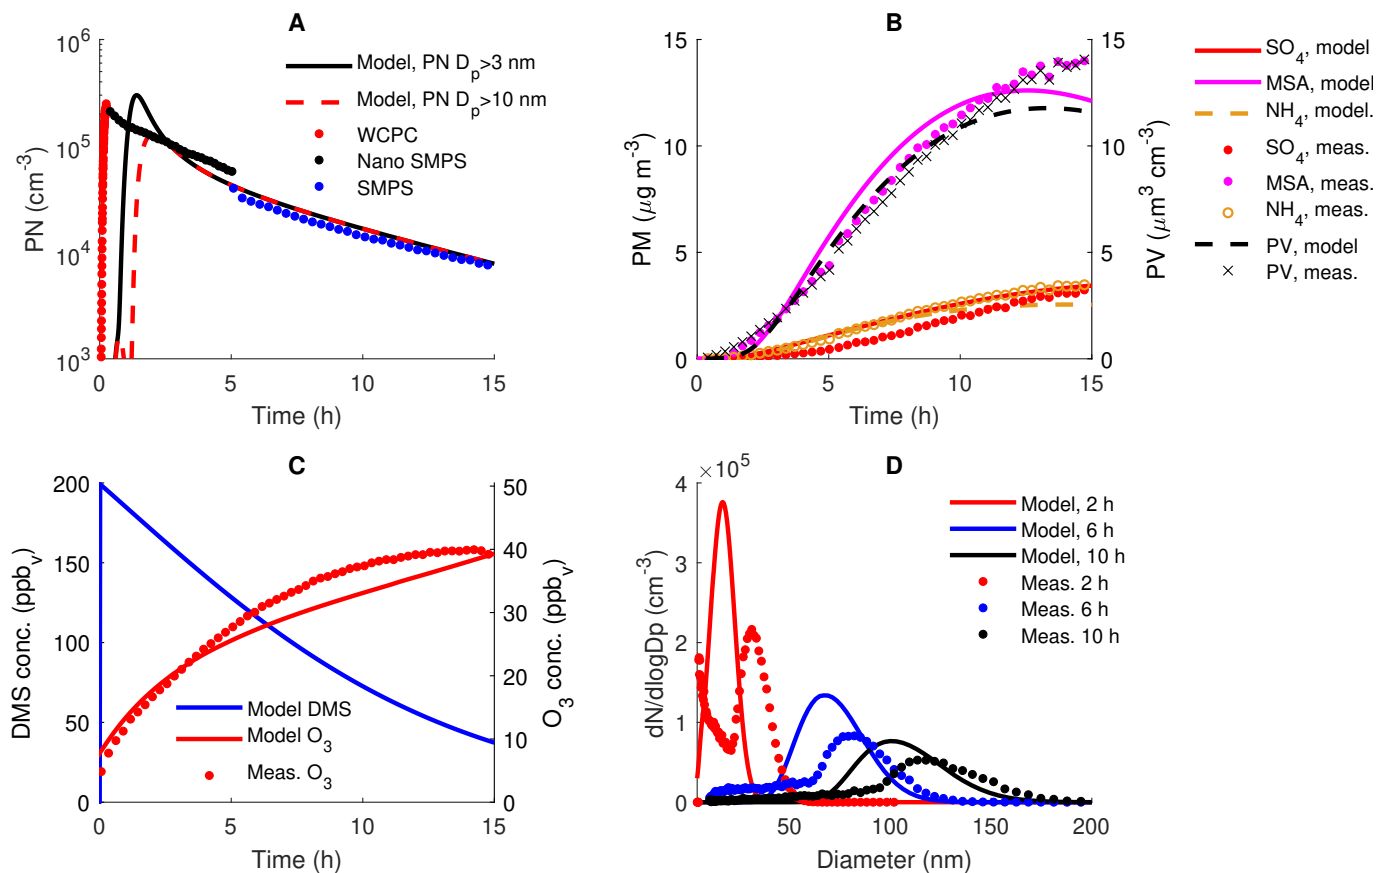

**Figure S26.** Model and measurement results from the dry DMS experiment DMS1. Panel **A**: measured and modelled particle number concentrations; Panel **B**: measured and modelled particle mass concentrations; Panel **C**: measured and modelled DMS and  $\text{O}_3$  concentrations; and Panel **D**: measured and modelled particle number size distributions.

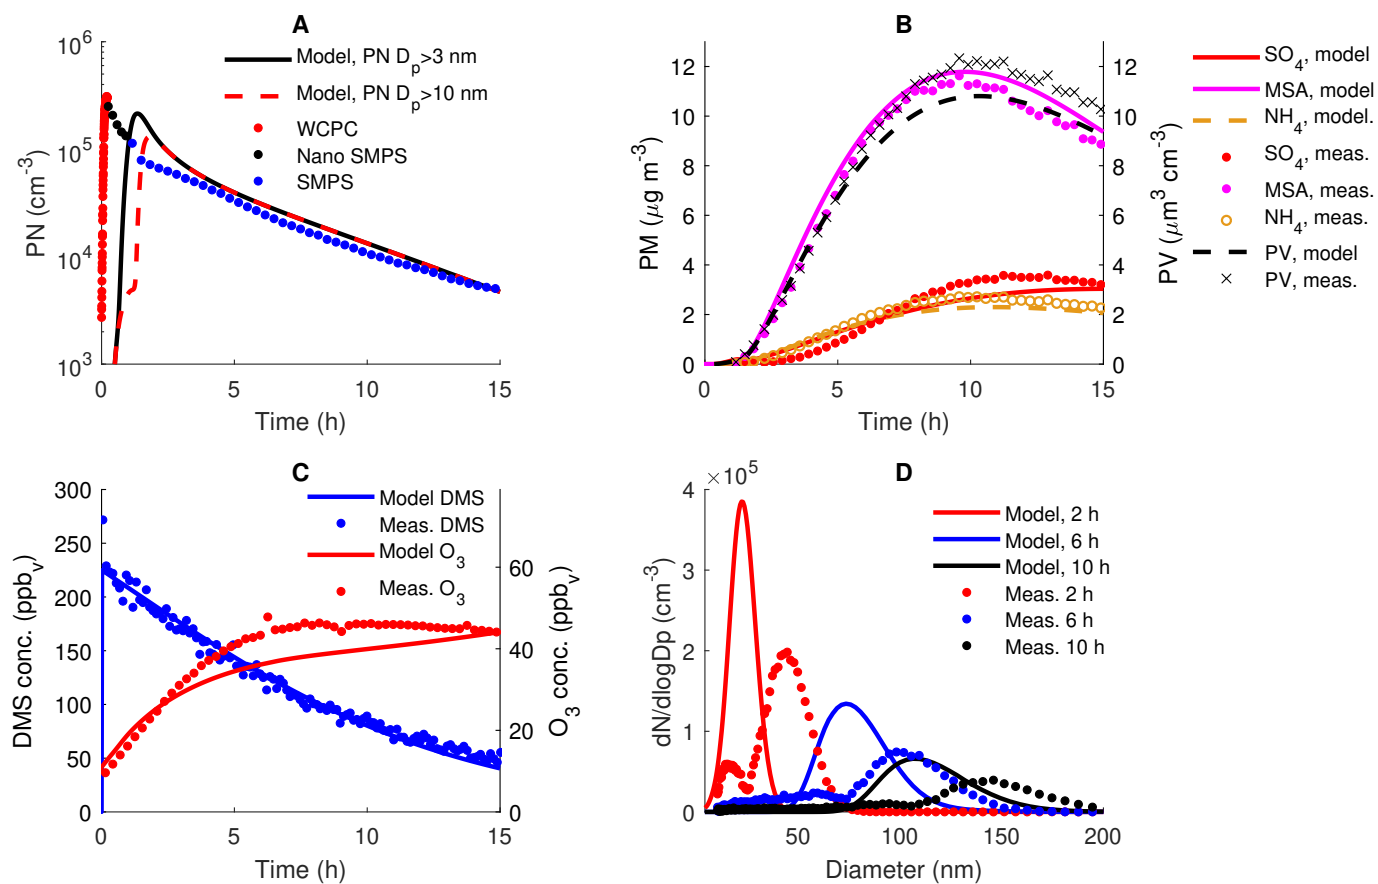

**Figure S27.** Model and measurement results from the dry DMS experiment DMS2. Panel **A**: measured and modelled particle number concentrations; Panel **B**: measured and modelled particle mass concentrations; Panel **C**: measured and modelled DMS and  $\text{O}_3$  concentrations; and Panel **D**: measured and modelled particle number size distributions.

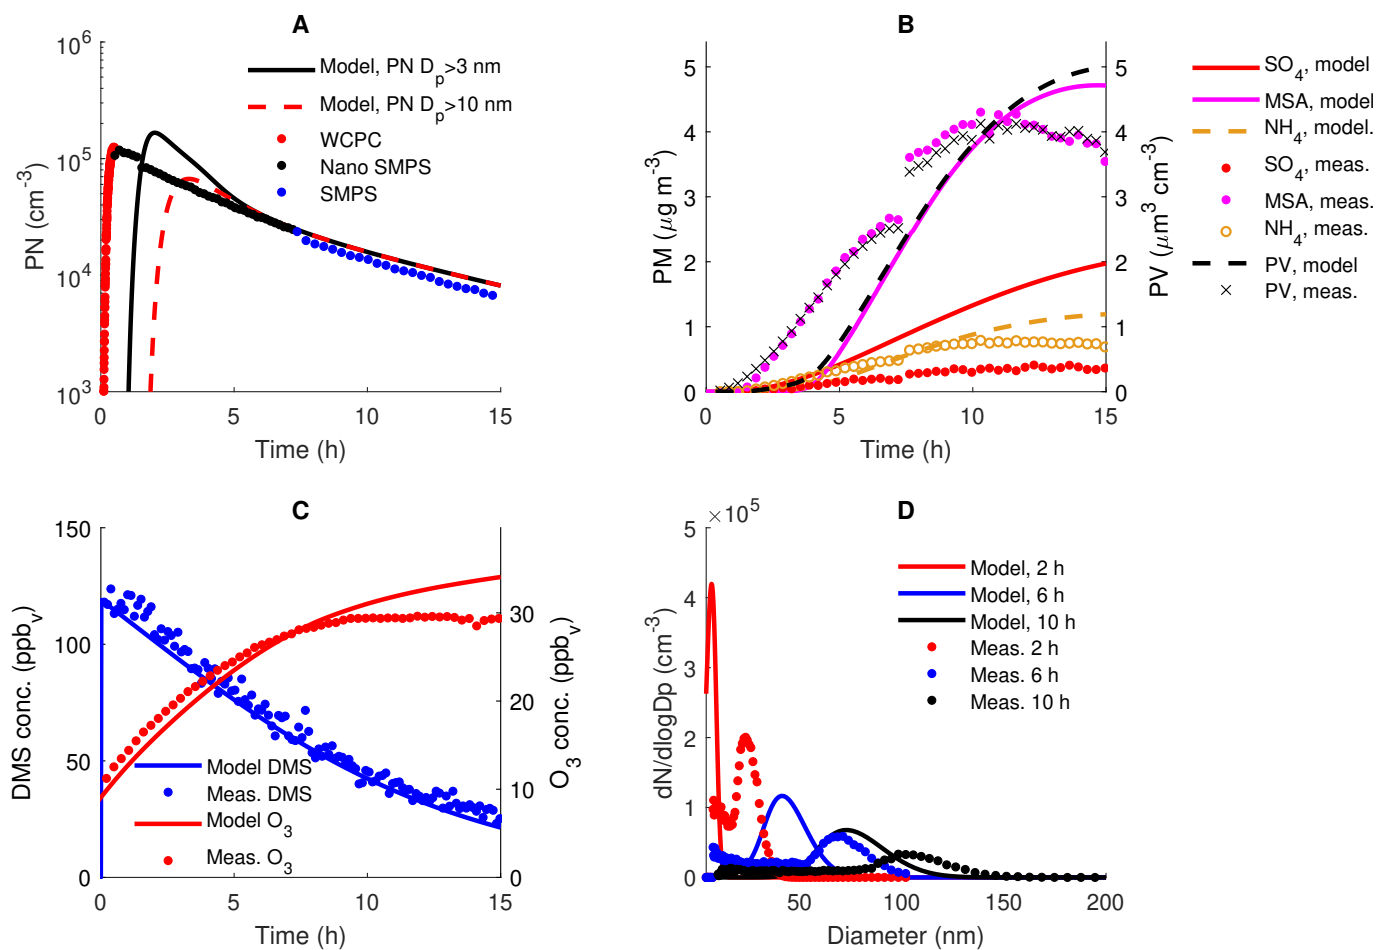

**Figure S28.** Model and measurement results from the dry DMS experiment DMS3. Panel **A**: measured and modelled particle number concentrations; Panel **B**: measured and modelled particle mass concentrations; Panel **C**: measured and modelled DMS and  $\text{O}_3$  concentrations; and Panel **D**: measured and modelled particle number size distributions.



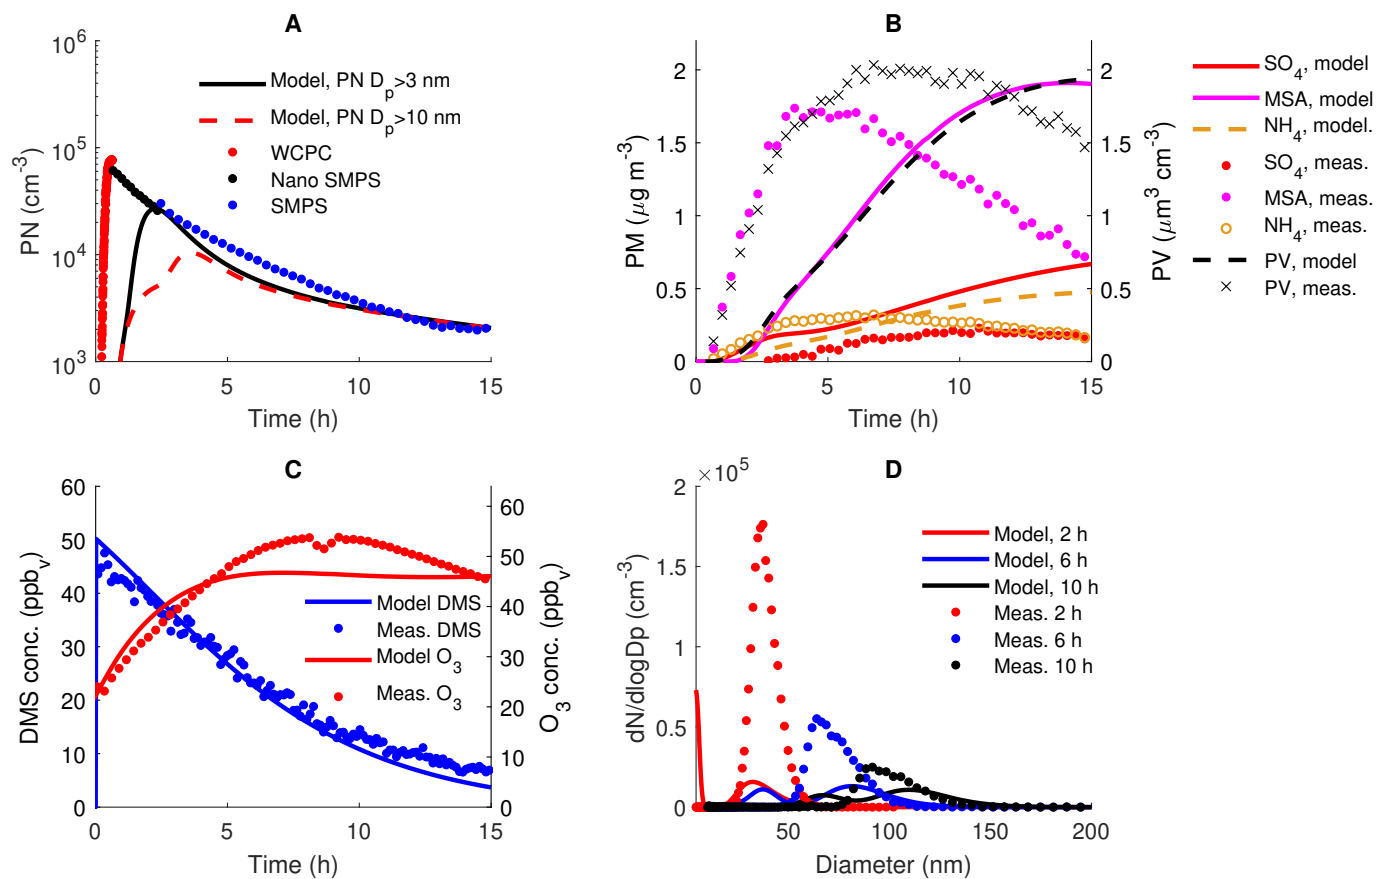

**Figure S29.** Model and measurement results from the dry DMS experiment DMS4. Panel **A**: measured and modelled particle number concentrations; Panel **B**: measured and modelled particle mass concentrations; Panel **C**: measured and modelled DMS and O<sub>3</sub> concentrations; and Panel **D**: measured and modelled particle number size distributions.

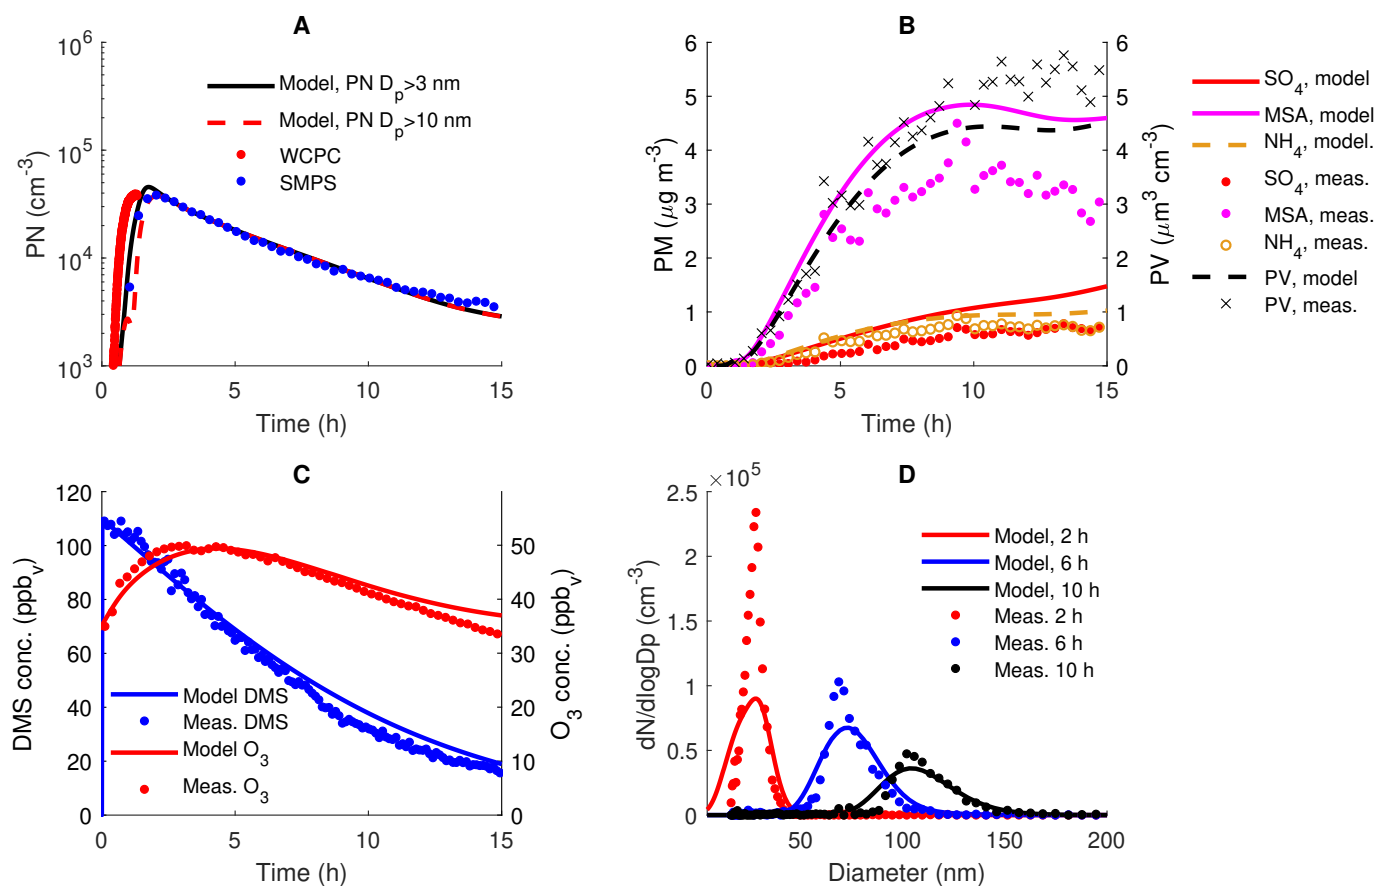

**Figure S30.** Model and measurement results from the dry DMS experiment DMS5. Panel **A**: measured and modelled particle number concentrations; Panel **B**: measured and modelled particle mass concentrations; Panel **C**: measured and modelled DMS and O<sub>3</sub> concentrations; and Panel **D**: measured and modelled particle number size distributions.

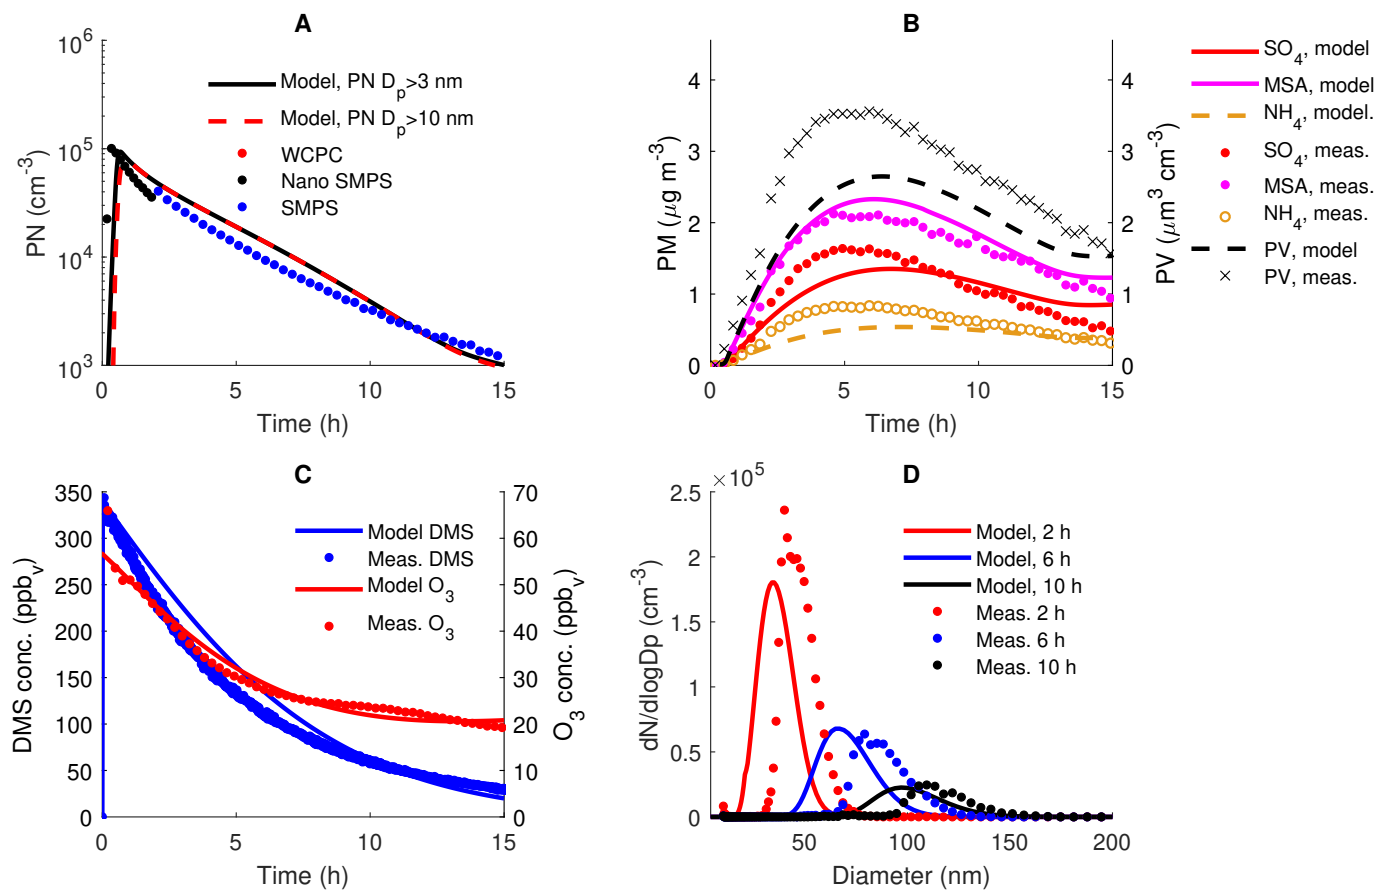

**Figure S31.** Model and measurement results from the humid DMS experiment DMS6. Panel **A**: measured and modelled particle number concentrations; Panel **B**: measured and modelled particle mass concentrations; Panel **C**: measured and modelled DMS and  $\text{O}_3$  concentrations; and Panel **D**: measured and modelled particle number size distributions.

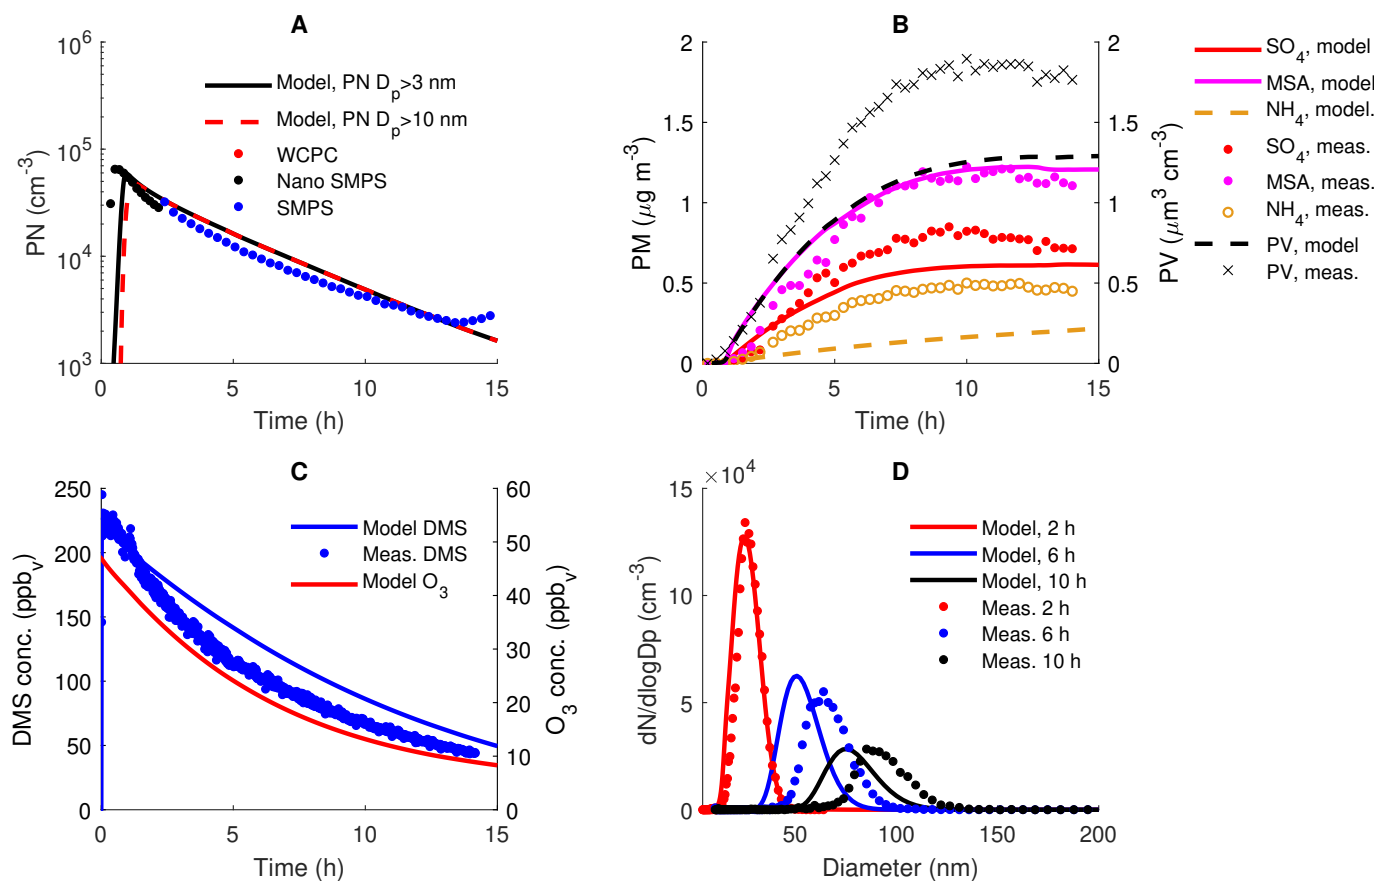

**Figure S32.** Model and measurement results from the humid and cold DMS experiment DMS7. Panel **A**: measured and modelled particle number concentrations; Panel **B**: measured and modelled particle mass concentrations; Panel **C**: measured and modelled DMS and O<sub>3</sub> concentrations; and Panel **D**: measured and modelled particle number size distributions.

### S3.2 HMPTF and MSIA gas-phase chemistry

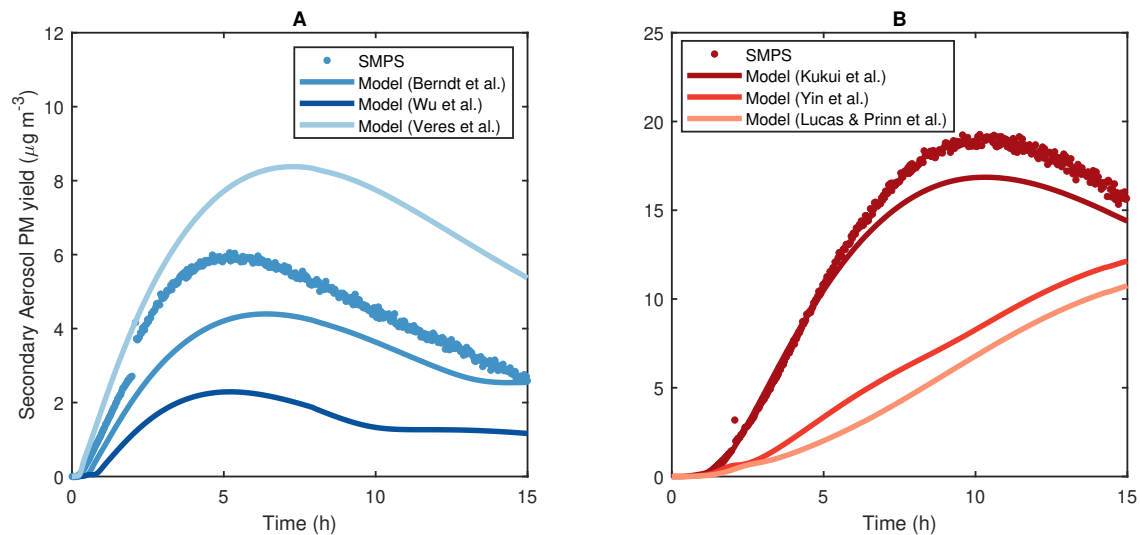

**Figure S33.** Modelled and measured (SMPS) PM using the  $\text{CH}_3\text{SCH}_2\text{OO}$  radical autoxidation rate from Berndt et al. (2019), Veres et al. (2020) or Yin et al. (1990), panel **A**, and the MSIA + OH oxidation rate by Kukui et al. (2003), Yin et al. (1990) or Lucas and Prinn (2002), panel **B**. Model runs are color-coded by their reaction constant - a strong color denoting a high value.

### **S3.3 Atmospheric implication**

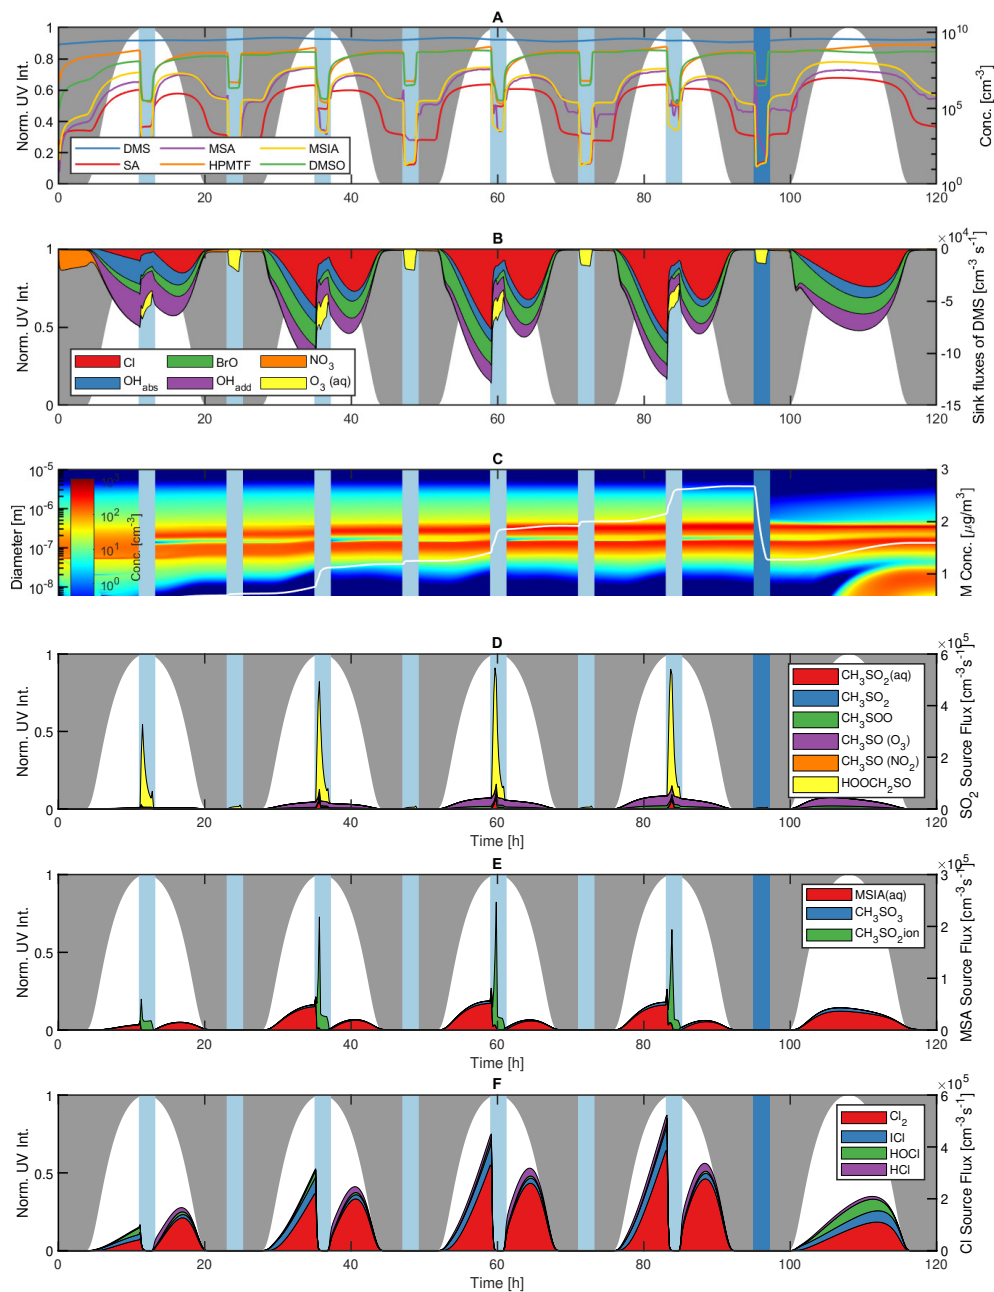

**Figure S34.** Modelled DMS oxidation and subsequent PM production related to the PolAtm sensitivity run. Panel A illustrates the evolution of DMS, SA, MSA, HMPMTF, MSIA and DMSO gas-phase concentrations, B the sink fluxes of DMS due to Cl, OH, BrO,  $\text{NO}_3$  and  $\text{O}_3$  and C the number size distribution and secondary aerosol PM production. Panel D, E and F denote the source flux of  $\text{SO}_2$ , MSA and Cl, respectively. Light blue areas denote in-cloud period, in which rain events are represented as dark blue. Night and daytime periods are represented by the normalised UV-intensity and marked by grey and white areas, respectively.

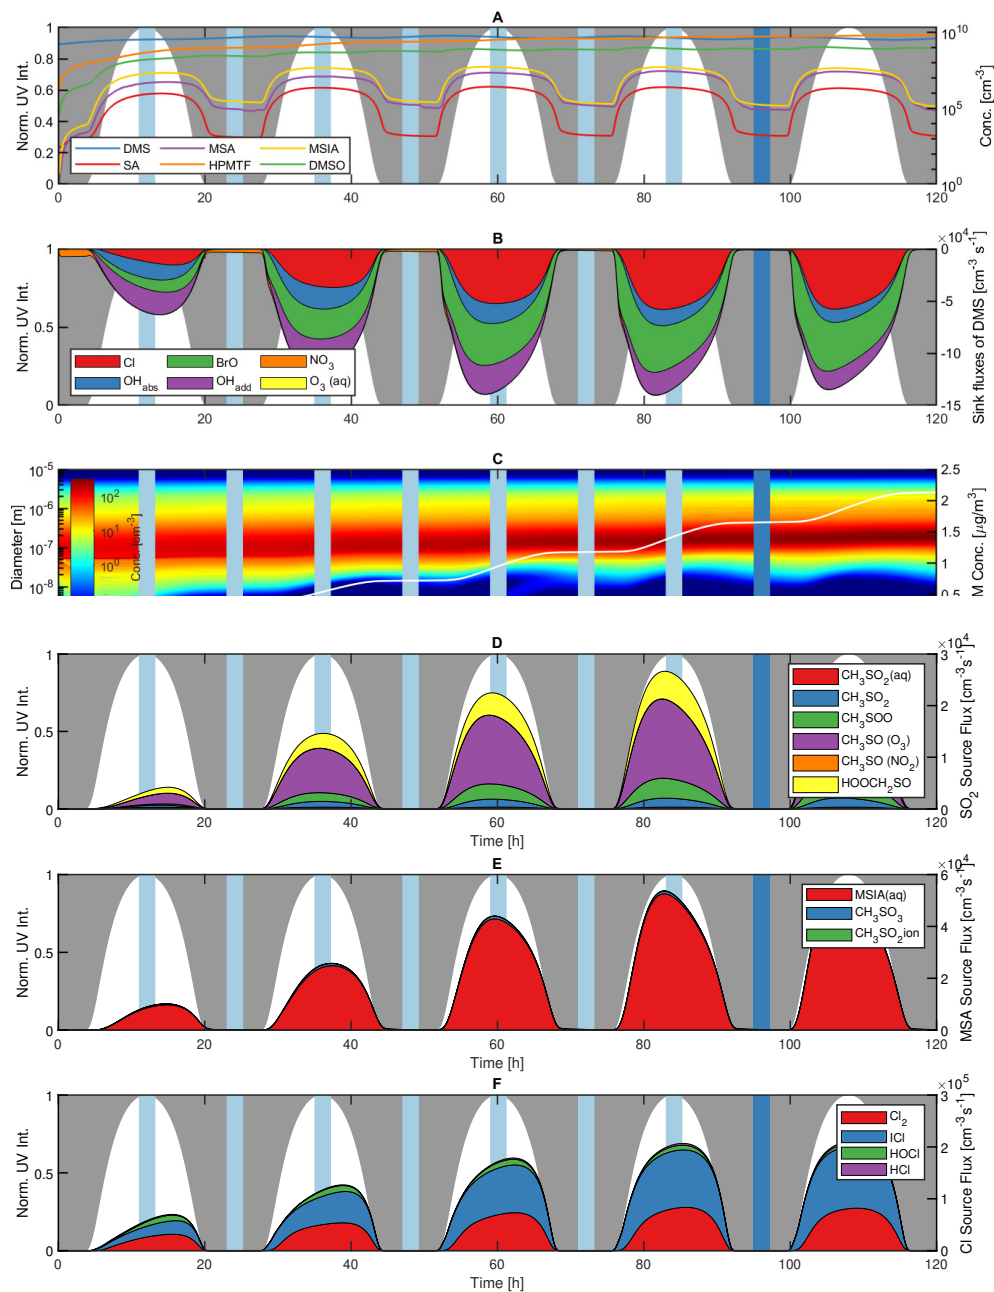

**Figure S35.** Modelled DMS oxidation and subsequent PM production related to the woCloudAtm sensitivity run. Panel **A** illustrates the evolution of DMS, SA, MSA, HPMTF, MSIA and DMSO gas-phase concentrations, **B** the sink fluxes of DMS due to Cl, OH, BrO, NO<sub>3</sub> and O<sub>3</sub> and **C** the number size distribution and secondary aerosol PM production. Panel **D**, **E** and **F** denote the source flux of SO<sub>2</sub>, MSA and Cl, respectively. Light blue areas denote in-cloud period, in which rain events are represented as dark blue. Night and daytime periods are represented by the normalised UV-intensity and marked by grey and white areas, respectively.



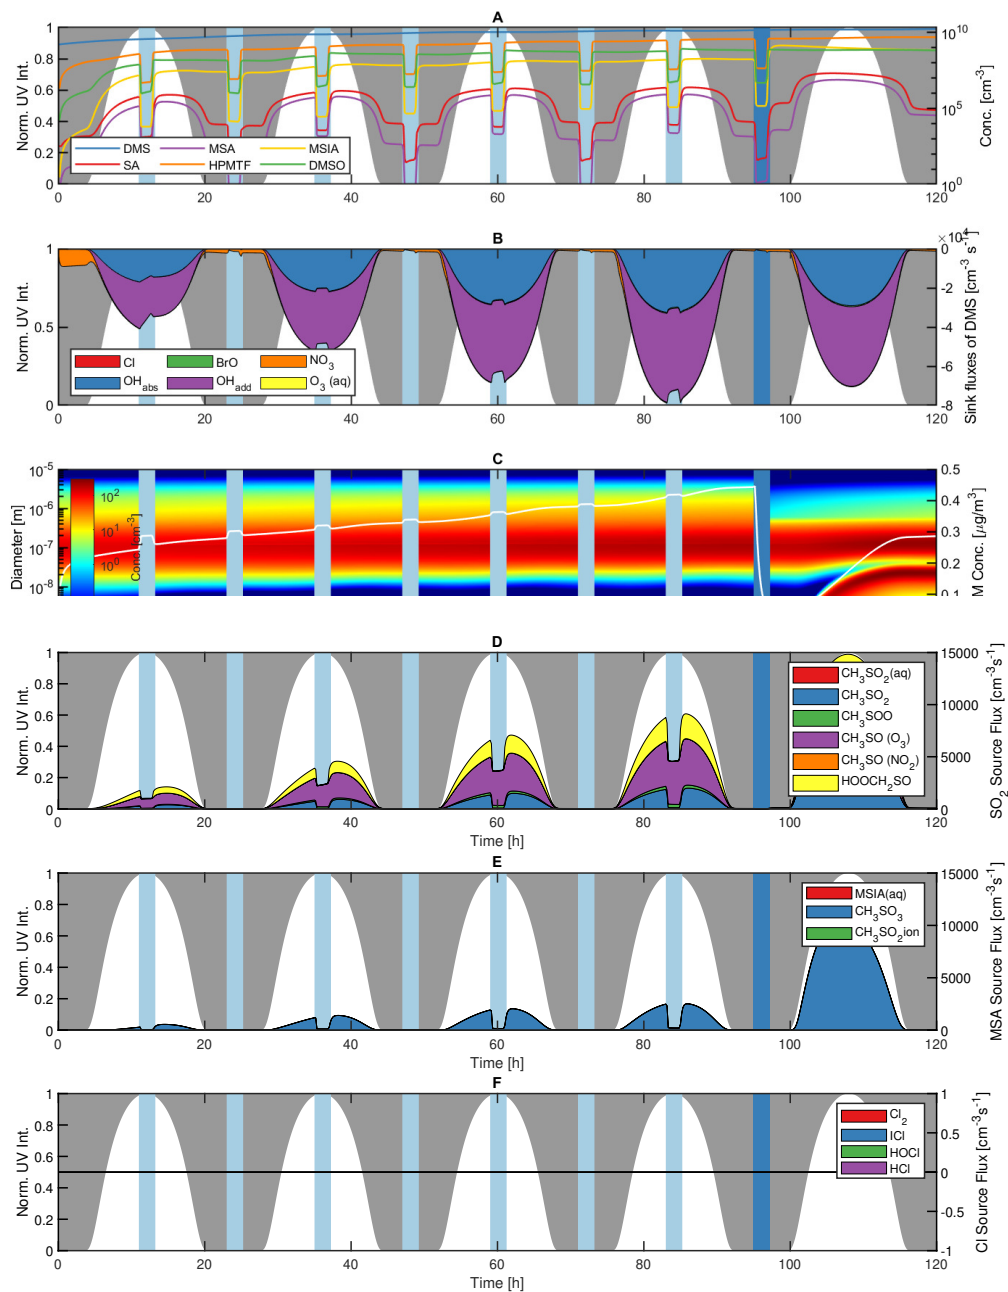

**Figure S36.** Modelled DMS oxidation and subsequent PM production related to the woAqAtm sensitivity run. Panel A illustrates the evolution of DMS, SA, MSA, HPMTF, MSIA and DMSO gas-phase concentrations, B the sink fluxes of DMS due to Cl, OH, BrO, NO<sub>3</sub> and O<sub>3</sub> and C the number size distribution and secondary aerosol PM production. Panel D, E and F denote the source flux of SO<sub>2</sub>, MSA and Cl, respectively. Light blue areas denote in-cloud period, in which rain events are represented as dark blue. Night and daytime periods are represented by the normalised UV-intensity and marked by grey and white areas, respectively.

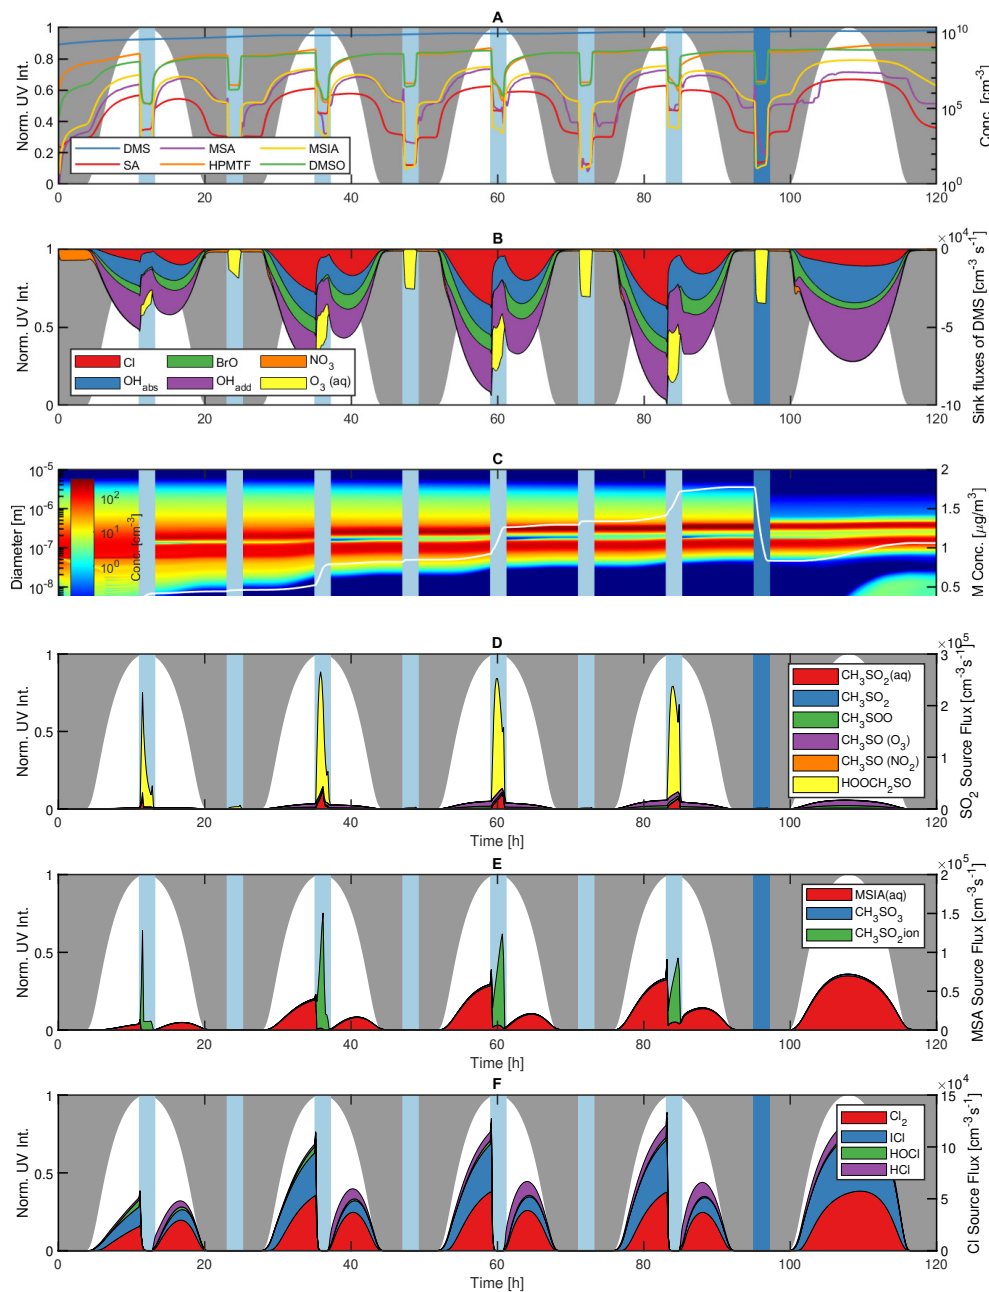

**Figure S37.** Modelled DMS oxidation and subsequent PM production related to the lowWindAtm sensitivity run. Panel A illustrates the evolution of DMS, SA, MSA, HPMTF, MSIA and DMSO gas-phase concentrations, B the sink fluxes of DMS due to Cl, OH, BrO, NO<sub>3</sub> and O<sub>3</sub> and C the number size distribution and secondary aerosol PM production. Panel D, E and F denote the source flux of SO<sub>2</sub>, MSA and Cl, respectively. Light blue areas denote in-cloud period, in which rain events are represented as dark blue. Night and daytime periods are represented by the normalised UV-intensity and marked by grey and white areas, respectively.

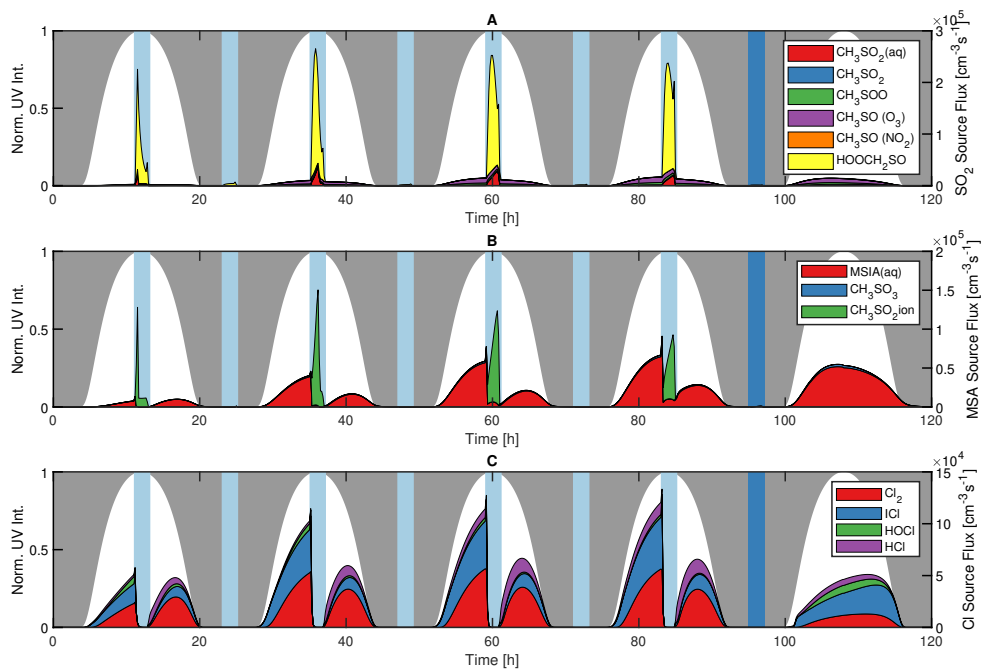

**Figure S38.** Modelled DMS oxidation related to the AtmMain base run. Panel **A**, **B** and **C** denote the source flux of  $\text{SO}_2$ , MSA and Cl, respectively. Light blue areas denote in-cloud period, in which rain events are represented as dark blue. Night and daytime periods are represented by the normalised UV-intensity and marked by grey and white areas, respectively.

## References

- 85 Atkinson, R., Baulch, D., Cox, R., Crowley, J., Hampson, R., Hynes, R., Jenkin, M., Rossi, M., and Troe, J.: Evaluated kinetic and photochemical data for atmospheric chemistry: Volume III - Gas phase reactions of inorganic halogens, *Atmospheric Chemistry and Physics*, 7, <https://doi.org/10.5194/acp-7-981-2007>, 2007.
- Atkinson, R., Baulch, D., Cox, R., Crowley, J., Hampson, R., Hynes, R., Jenkin, M., Rossi, M., J. T., and Wallington, T.: Evaluated kinetic and photochemical data for atmospheric chemistry: Volume IV—gas phase reactions of organic halogen species, *Atmospheric Chemistry and Physics*, 8, <https://doi.org/10.5194/acp-8-4141-2008>, 2008.
- 90 Berndt, T., Scholz, W., Mentler, B., Fischer, L., Hoffmann, E., Tilgner, A., Hyttinen, N., Prisle, N. L., Hansel, A., and Herrmann, H.: Fast Peroxy Radical Isomerization and OH Recycling in the Reaction of OH Radicals with Dimethyl Sulfide, *The Journal of Physical Chemistry Letters*, 2019, <https://doi.org/10.1021/acs.jpcclett.9b02567>, 2019.
- Berndt, T., Chen, J., Møller, K. H., Hyttinen, N., Prisle, N. L., Tilgner, A., Hoffmann, E. H., Herrmann, H., and Kjaergaard, H. G.: SO<sub>2</sub> formation and peroxy radical isomerization in the atmospheric reaction of OH radicals with dimethyl disulfide, *Chem. Commun.*, 56, 13 634–13 637, <https://doi.org/10.1039/D0CC05783E>, <http://dx.doi.org/10.1039/D0CC05783E>, 2020.
- Braeuer, P., Tilgner, A., Wolke, R., and Herrmann, H.: Mechanism development and modelling of tropospheric multiphase halogen chemistry: The CAPRAM Halogen Module 2.0 (HM2), *JOURNAL OF ATMOSPHERIC CHEMISTRY*, 70, 19–52, <https://doi.org/10.1007/s10874-013-9249-6>, 2013.
- 100 Burkholder, J. B., Sander, S. P., Abbatt, J., Barker, J. R., Huie, R. E., Kolb, C. E., Kurylo, M. J., Orkin, V. L., Wilmouth, D. M., and H. W. P.: Chemical Kinetics and Photochemical Data for Use in Atmospheric Studies, Evaluation No. 18, JPL Publication, 15-10, <https://doi.org/http://jpldataeval.jpl.nasa.gov>, 2015.
- COSMOconf: version 4.3, COSMOlogic GmbH & Co. KG., Leverkusen, Germany, 2013.
- Demore, W., Sander, S., Golden, D., Hampson, R., Kurylo, M., Howard, C., Ravishankara, A., Kolb, C., and Molina, M.: Chemical Kinetics and Photochemical Data for Use in Stratospheric Modeling, JPL Publication, 90, 1997.
- 105 Hoffmann, E. H., Tilgner, A., Schrödner, R., Bräuer, P., Wolke, R., and Herrmann, H.: An advanced modeling study on the impacts and atmospheric implications of multiphase dimethyl sulfide chemistry, *Proceedings of the National Academy of Sciences*, 113, 11 776–11 781, <https://doi.org/10.1073/pnas.1606320113>, <https://www.pnas.org/content/113/42/11776>, 2016.
- Jacobson, M. Z.: *Fundamentals of Atmospheric Modelling* (2nd edition), Cambridge University Press, Cambridge, United Kingdom and New York, NY, USA, 2005.
- 110 Kahan, T., Washenfelder, R., Vaida, V., and Brown, S.: Cavity-Enhanced Measurements of Hydrogen Peroxide Absorption Cross Sections from 353 to 410 nm, *The journal of physical chemistry. A*, 116, 5941–7, <https://doi.org/10.1021/jp2104616>, 2012.
- Kukui, A., Borissenko, D., Laverdet, G., and Bras, G.: Gas-Phase Reactions of OH Radicals with Dimethyl Sulfoxide and Methane Sulfinic Acid Using Turbulent Flow Reactor and Chemical Ionization Mass Spectrometry, *Journal of Physical Chemistry A*, 107, <https://doi.org/10.1021/jp0276911>, 2003.
- 115 Kulmala, M. and Laaksonen, A.: Binary nucleation of water–sulfuric acid system: Comparison of classical theories with different H<sub>2</sub>SO<sub>4</sub> saturation vapor pressures, *The Journal of Chemical Physics*, 93, 696–701, <https://doi.org/10.1063/1.459519>, <https://doi.org/10.1063/1.459519>, 1990.

- Kurtén, T., Hyttinen, N., D'Ambro, E. L., Thornton, J., and Prisle, N. L.: Estimating the saturation vapor pressures of isoprene oxidation products  $C_5H_{12}O_6$  and  $C_5H_{10}O_6$  using COSMO-RS, *Atmos. Chem. Phys.*, 18, 17 589–17 600, <https://doi.org/10.5194/acp-18-17589-2018>, 2018.
- Lucas, D. D. and Prinn, R. G.: Mechanistic studies of dimethylsulfide oxidation products using an observationally constrained model, *Journal of Geophysical Research: Atmospheres*, 107, ACH 12–1–ACH 12–26, <https://doi.org/10.1029/2001JD000843>, <https://agupubs.onlinelibrary.wiley.com/doi/abs/10.1029/2001JD000843>, 2002.
- 125 McMurry, P. H. and Grosjean, D.: Gas and Aerosol Wall Losses in Teflon Film Smog Chambers, *Environ. Sci. Technol.*, Vol. 19, No. 12., 19, 1176–1182, 1985.
- Quéléver, L. L. J., Kristensen, K., Jensen, L. N., Rosati, B., Teiwes, R., Daellenbach, K. R., Peräkylä, O., Roldin, P., Bossi, R., Pedersen, H. B., Glasius, M., Bilde, M., and Ehn, M.: Effect of temperature on the formation of highly oxygenated organic molecules (HOMs) from alpha-pinene ozonolysis, *Atmos. Chem. Phys.*, 19, 7609–7625, <https://doi.org/10.5194/acp-19-7609-2019>, 2019.
- 130 Sander, S., Friedl, R., Golden, D., Kurylo, M., Moortgat, G., Wine, P., Ravishankara, A., Kolb, C., Molina, M., Finlayson-Pitts, B., Huie, R., and Orkin, V.: Chemical Kinetics and Photochemical Data for Use in Atmospheric Studies, JPL Publication, 06–2, 2006.
- TURBOMOLE: Version 7.11, a development of University of Karlsruhe and Forschungszentrum Karlsruhe GmbH, TURBOMOLE GmbH, 2010.
- Veres, P. R., Neuman, J. A., Bertram, T. H., Assaf, E., Wolfe, G. M., Williamson, C. J., Weinzierl, B., Tilmes, S., Thompson, C. R., 135 Thames, A. B., Schroder, J. C., Saiz-Lopez, A., Rollins, A. W., Roberts, J. M., Price, D., Peischl, J., Nault, B. A., Møller, K. H., Miller, D. O., Meinardi, S., Li, Q., Lamarque, J.-F., Kupc, A., Kjaergaard, H. G., Kinnison, D., Jimenez, J. L., Jernigan, C. M., Hornbrook, R. S., Hills, A., Dollner, M., Day, D. A., Cuevas, C. A., Campuzano-Jost, P., Burkholder, J., Bui, T. P., Brune, W. H., Brown, S. S., Brock, C. A., Bourgeois, I., Blake, D. R., Apel, E. C., and Ryerson, T. B.: Global airborne sampling reveals a previously unobserved dimethyl sulfide oxidation mechanism in the marine atmosphere, *Proceedings of the National Academy of Sciences*, 117, 4505–4510, 140 <https://doi.org/10.1073/pnas.1919344117>, <https://www.pnas.org/content/117/9/4505>, 2020.
- Wu, R., Wang, S., and Wang, L.: A New Mechanism for The Atmospheric Oxidation of Dimethyl Sulfide. The Importance of Intramolecular Hydrogen Shift in  $CH_3SCH_2OO$  Radical., *The journal of physical chemistry. A*, 119, <https://doi.org/10.1021/jp511616j>, 2014.
- Yin, F., Grosjean, D., Flagan, R. C., and Seinfeld, J. H.: Photooxidation of dimethyl sulfide and dimethyl disulfide. II: Mechanism evaluation, *Journal of Atmospheric Chemistry*, 11, 365–399, <https://doi.org/10.1007/BF00053781>, <https://doi.org/10.1007/BF00053781>, 1990.
